# Supplementary material for: Natural Selection on Individual Variation in Tolerance of Gastrointestinal Nematode Infection
Source: PLoS Biol. 2014 Jul 29;12(7):e1001917. doi: 10.1371/journal.pbio.1001917 (PMC4114752; doi:10.1371/journal.pbio.1001917)
Supplement: Table S2 — The phenotypic data used for all analyses described in the manuscript. Any abbreviations given are as in the article. (XLSX) [file pbio.1001917.s003.xlsx]

## Sheet: Table S2
ID	Sex	MumID	Year	Weight	FEC	LBS	Age
777	1	625	4	28.6	0	11	11
777	1	625	5	27.8	100	11	11
777	1	625	6	28	0	11	11
1104	1	615	1	26	300	10	6
1104	1	615	2	20	0	10	7
1277	1	772	3	30.6	0	5	7
1277	1	772	4	29	0	5	8
1277	1	772	5	28.8	0	5	9
1277	1	772	6	29.4	0	5	10
1277	1	772	9	27.4	100	5	11
1277	1	772	10	26	0	5	11
1277	1	772	11	24.9	0	5	11
1289	1	626	5	18	500	4	9
1298	1	624	4	24.8	0	9	8
1298	1	624	5	23.6	0	9	9
1423	2	949	2	29.6	900	56	5
1442	1	1105	3	28.5	0	15	6
1442	1	1105	4	27.9	0	15	7
1442	1	1105	5	27.7	300	15	8
1442	1	1105	6	25.8	300	15	9
1442	1	1105	7	25.3	300	15	10
1444	1	1099	4	23.4	0	9	7
1444	1	1099	5	21.6	100	9	8
1446	1	409	1	27	0	10	4
1446	1	409	5	27.6	200	10	8
1446	1	409	6	27.1	100	10	9
1446	1	409	7	29.6	300	10	10
1446	1	409	8	27.3	0	10	11
1446	1	409	9	27.7	0	10	11
1455	1	503	2	24.6	0	13	5
1455	1	503	4	23.6	0	13	7
1455	1	503	6	24.9	100	13	9
1455	1	503	7	24.3	500	13	10
1455	1	503	8	23.1	100	13	11
1455	1	503	9	21.5	300	13	11
1463	1	774	1	26.1	300	7	4
1463	1	774	4	21.3	600	7	7
1754	1	951	4	23.8	0	8	6
1754	1	951	5	24.5	0	8	7
1754	1	951	6	21.8	200	8	8
1792	2	777	1	29.6	700	1	2
1797	1	949	1	22.8	0	2	2
1798	2	620	1	24.2	0	1	2
1804	2	1783	1	33	600	4	2
1805	1	1280	1	19.3	0	2	2
1814	2	1105	1	35.5	700	4	2
1815	2	1276	1	27.2	200	4	2
1821	2	1278	1	30.4	200	2	2
1825	2	947	1	29.8	0	0	2
1829	2	205	1	30.8	0	7	2
1832	1	951	1	18	500	2	2
1839	1	221	1	20.3	0	2	2
1842	2	1489	1	26.7	500	1	2
1845	1	1786	1	15.8	0	2	2
1848	2	625	1	24.8	300	2	2
1849	1	751	8	22.3	200	12	9
1860	1	755	1	24.7	300	8	2
1860	1	755	3	29	0	8	4
1860	1	755	7	27.8	0	8	8
1863	1	1309	4	27.9	0	12	5
1863	1	1309	7	25.8	800	12	8
1863	1	1309	14	25.3	0	12	11
1864	1	616	1	18.5	0	15	2
1864	1	616	3	27.7	200	15	4
1864	1	616	4	24.6	0	15	5
1864	1	616	6	26.3	0	15	7
1864	1	616	8	23.1	0	15	9
1866	1	1282	2	17.1	0	7	3
1866	1	1282	7	23	100	7	8
1866	1	1282	8	21	0	7	9
1866	1	1282	10	19.8	300	7	11
1935	2	1832	1	19.5	0	1	1
1938	2	774	1	24.5	700	1	1
1939	2	405	1	27.4	500	1	1
1941	1	757	3	24.6	0	12	3
1941	1	757	4	24	100	12	4
1941	1	757	5	22.4	0	12	5
1941	1	757	8	24.7	0	12	8
1944	1	1301	1	18.3	300	1	1
1945	2	618	1	29.6	800	0	1
1946	2	1754	1	24.6	500	2	1
1946	2	1754	2	20	600	2	2
1947	1	1295	1	17	0	1	1
1950	1	1280	1	19.8	0	1	1
1951	2	1280	1	26.4	500	1	1
1955	2	777	1	35	600	0	1
1956	1	1426	1	19	0	2	1
1957	1	1298	4	21.8	0	9	4
1957	1	1298	5	24.2	0	9	5
1960	2	1106	1	28.1	300	1	1
1961	1	1425	1	17.2	800	1	1
1968	2	1463	1	27.1	400	0	1
1974	1	1294	1	21	0	1	1
1975	2	205	1	28	0	2	1
1976	2	205	1	29	400	0	1
1979	1	616	1	17	100	1	1
1982	2	1276	1	22.4	0	1	1
1984	1	1797	3	23.7	0	6	3
1984	1	1797	4	23.3	0	6	4
1984	1	1797	5	23.2	0	6	5
1984	1	1797	7	23	0	6	7
1984	1	1797	9	22.3	100	6	9
1984	1	1797	10	22.4	0	6	10
1991	2	1810	1	20.8	0	0	1
2003	2	223	2	17.8	1100	2	2
2016	2	755	1	26.4	700	0	1
2017	1	1831	1	25.3	400	4	1
2019	2	1805	1	27.6	300	0	1
2020	1	1462	4	30.8	100	11	4
2025	1	1283	2	24.6	0	8	2
2025	1	1283	4	25.8	0	8	4
2025	1	1283	7	26	0	8	7
2033	2	1451	1	25.2	0	0	1
2034	1	760	4	22.6	0	11	4
2034	1	760	5	22.6	0	11	5
2034	1	760	6	22.4	0	11	6
2034	1	760	7	21.6	0	11	7
2034	1	760	8	21.2	0	11	8
2034	1	760	10	22.6	100	11	10
2035	1	1783	1	17	300	3	1
2035	1	1783	2	23.4	0	3	2
2035	1	1783	4	24.1	0	3	4
2046	2	949	1	30.8	0	0	1
2055	2	221	1	28.8	0	0	1
2076	1	625	1	19.2	200	8	1
2076	1	625	2	24.4	0	8	2
2076	1	625	3	26.4	0	8	3
2076	1	625	4	26.4	0	8	4
2076	1	625	5	23.9	200	8	5
2076	1	625	6	25	200	8	6
2076	1	625	7	24.1	100	8	7
2076	1	625	8	25.4	0	8	8
2076	1	625	9	25.3	0	8	9
2076	1	625	10	23.3	0	8	10
2077	1	626	5	24.9	100	16	5
2077	1	626	7	25	100	16	7
2080	1	1272	1	19.8	100	11	1
2080	1	1272	2	24.4	0	11	2
2080	1	1272	3	26.4	0	11	3
2080	1	1272	4	25.1	0	11	4
2080	1	1272	6	25.8	100	11	6
2080	1	1272	9	24.2	100	11	9
2080	1	1272	10	25.4	0	11	10
2082	1	1101	4	21.2	0	9	4
2083	2	1458	2	20	0	15	2
2084	2	1309	6	40.1	400	11	6
2085	1	952	1	21.6	200	7	1
2085	1	952	4	26.7	0	7	4
2085	1	952	6	28.1	0	7	6
2085	1	952	7	25.9	100	7	7
2087	1	1460	2	18.2	0	9	2
2087	1	1460	4	23.8	0	9	4
2087	1	1460	7	23.6	200	9	7
2090	2	1282	1	22	700	20	1
2090	2	1282	4	23.8	400	20	4
2090	2	1282	6	34.6	1200	20	6
2091	1	1279	2	23.2	400	9	2
2091	1	1279	3	26.7	100	9	3
2091	1	1279	4	25.9	0	9	4
2091	1	1279	9	25	0	9	9
2091	1	1279	10	25	600	9	10
2108	1	1783	1	18.8	0	0	0
2113	2	1974	1	13.1	400	0	0
2115	2	1862	1	20.6	300	0	0
2116	1	1950	1	12.2	100	0	0
2119	1	620	1	16.6	200	0	0
2128	2	1106	1	13.8	100	0	0
2129	1	1106	1	13.2	400	0	0
2132	1	405	1	9.5	1100	0	0
2134	2	1810	1	13	1300	0	0
2141	1	755	1	15.8	200	0	0
2152	1	1104	1	15.2	0	0	0
2163	2	1289	1	18.8	200	0	0
2166	1	1425	1	14.4	0	0	0
2168	1	1805	1	15.1	200	0	0
2169	2	1823	1	15	1000	0	0
2172	2	1461	1	22	100	0	0
2173	2	1860	1	17.6	500	0	0
2174	1	1864	1	16	1000	0	0
2176	2	1963	1	9	400	0	0
2181	1	1273	5	21.1	0	5	4
2182	2	1948	1	11.1	500	0	0
2184	2	1845	1	14.2	700	0	0
2189	1	1460	1	16.4	0	0	0
2190	1	1290	1	12.2	800	0	0
2191	2	1290	1	15.6	500	0	0
2196	2	1488	1	17.5	400	0	0
2201	2	1455	1	19.8	100	2	0
2202	2	1444	1	20	300	0	0
2207	2	951	1	20.5	500	1	0
2216	2	1276	1	19.5	700	0	0
2219	2	1282	1	17.7	600	0	0
2220	2	1282	1	14.8	100	0	0
2228	2	2099	1	18.8	300	0	0
2232	1	1961	1	11.4	600	0	0
2240	2	626	1	19.4	500	0	0
2241	2	2091	1	10.3	500	0	0
2242	2	1451	1	18.3	200	0	0
2254	2	1832	1	13.5	1000	0	0
2256	1	771	1	11.4	400	0	0
2264	1	1272	1	16.2	200	7	0
2264	1	1272	2	20.2	200	7	1
2264	1	1272	4	22.2	100	7	3
2264	1	1272	5	24	0	7	4
2264	1	1272	6	27.5	400	7	5
2266	1	1099	5	22.2	0	12	4
2266	1	1099	6	23.2	0	12	5
2266	1	1099	11	23.3	100	12	10
2266	1	1099	12	20.9	100	12	11
2267	1	1104	1	14	500	1	0
2267	1	1104	2	20.7	0	1	1
2267	1	1104	3	23.8	0	1	2
2267	1	1104	4	20.4	0	1	3
2268	1	1283	3	25	0	0	2
2268	1	1283	7	31	0	0	6
2268	1	1283	9	29.5	0	0	8
2269	1	1295	5	23.4	200	11	4
2269	1	1295	6	25.3	400	11	5
2269	1	1295	7	25.6	400	11	6
2269	1	1295	8	25.6	400	11	7
2269	1	1295	9	26.2	400	11	8
2270	1	1302	4	25.7	0	0	3
2270	1	1302	5	26	300	0	4
2271	1	1446	1	18	800	9	0
2271	1	1446	5	16.2	500	9	4
2271	1	1446	7	26.2	200	9	6
2271	1	1446	8	23.1	200	9	7
2271	1	1446	10	22.1	200	9	9
2271	1	1446	11	19.3	1400	9	10
2272	1	947	1	16.8	500	0	0
2272	1	947	3	21.4	100	0	2
2272	1	947	4	22.4	0	0	3
2272	1	947	5	21.6	100	0	4
2272	1	947	10	22	200	0	9
2273	1	1105	1	17.9	200	17	0
2273	1	1105	3	25.6	0	17	2
2273	1	1105	4	25.3	0	17	3
2273	1	1105	5	25.1	0	17	4
2273	1	1105	6	26.2	0	17	5
2273	1	1105	8	25.7	200	17	7
2273	1	1105	10	24.1	200	17	9
2273	1	1105	11	23.1	0	17	10
2274	1	1754	1	17.2	500	2	0
2275	1	760	5	22.5	300	9	4
2275	1	760	6	24.1	0	9	5
2275	1	760	7	21.9	200	9	6
2275	1	760	8	22.5	0	9	7
2275	1	760	9	23.8	0	9	8
2296	2	1446	3	27.9	200	56	1
2296	2	1446	4	20.7	0	56	2
2296	2	1446	5	40.2	300	56	3
2296	2	1446	6	43.7	900	56	4
2296	2	1446	9	46.2	600	56	6
2296	2	1446	10	40.6	900	56	6
2299	2	777	2	15.1	600	9	0
2299	2	777	3	30.7	0	9	1
2299	2	777	4	31	300	9	2
2299	2	777	5	31.6	600	9	3
2299	2	777	6	36.6	900	9	4
2299	2	777	7	35	200	9	5
2305	1	955	3	15.3	100	2	1
2308	1	2087	2	15.8	200	0	0
2310	1	1282	2	10.2	600	0	0
2310	1	1282	3	14.6	0	0	1
2310	1	1282	4	16.8	100	0	2
2315	2	1105	3	22.3	200	49	1
2315	2	1105	4	32.9	400	49	2
2315	2	1105	5	35.4	100	49	3
2315	2	1105	6	37.9	100	49	4
2315	2	1105	7	37.5	400	49	5
2320	1	1462	3	19.6	200	3	1
2320	1	1462	4	22.2	200	3	2
2321	2	615	3	23.9	0	6	1
2323	2	1426	3	30.9	0	6	1
2326	2	1309	2	11.2	200	24	0
2326	2	1309	4	30.7	200	24	2
2326	2	1309	5	31.6	100	24	3
2326	2	1309	6	36.3	100	24	4
2333	2	1861	3	16	700	2	1
2335	2	1865	4	31.5	100	11	2
2335	2	1865	5	34.9	400	11	3
2341	2	1304	3	16.5	0	0	1
2341	2	1304	4	30.7	300	0	2
2343	1	2082	5	17.5	0	5	3
2346	1	1456	6	25.5	0	12	4
2349	2	2017	7	44.2	400	14	5
2354	1	1683	10	21.9	0	8	8
2359	1	1451	4	24.6	100	0	2
2359	1	1451	5	25.7	0	0	3
2359	1	1451	6	26.3	0	0	4
2359	1	1451	9	26.5	0	0	7
2362	2	1104	3	20.7	100	5	1
2362	2	1104	4	31.9	900	5	2
2362	2	1104	5	32.4	600	5	3
2362	2	1104	6	35.9	200	5	4
2362	2	1104	7	36.5	500	5	5
2362	2	1104	8	37.7	0	5	6
2362	2	1104	9	38	900	5	6
2362	2	1104	10	37.4	500	5	6
2363	1	1425	4	20.7	400	10	2
2363	1	1425	5	22.9	100	10	3
2363	1	1425	6	23.2	200	10	4
2363	1	1425	7	22.8	600	10	5
2363	1	1425	8	23.1	200	10	6
2363	1	1425	9	22	100	10	7
2363	1	1425	10	22.6	0	10	8
2363	1	1425	11	20.4	0	10	9
2364	1	1460	3	18.8	0	7	1
2364	1	1460	4	17.7	100	7	2
2365	1	1444	6	22	0	5	4
2365	1	1444	7	22.1	100	5	5
2367	1	1283	3	16.6	0	9	1
2367	1	1283	4	18.1	100	9	2
2367	1	1283	5	19.5	0	9	3
2367	1	1283	6	21.9	0	9	4
2367	1	1283	7	20.3	0	9	5
2367	1	1283	8	21.5	0	9	6
2367	1	1283	10	21.2	100	9	8
2368	1	1489	6	22.7	300	8	4
2368	1	1489	11	20.5	0	8	9
2369	1	1279	2	11	1200	8	0
2369	1	1279	3	19.8	200	8	1
2369	1	1279	4	20.2	400	8	2
2369	1	1279	5	21.4	100	8	3
2369	1	1279	6	17.9	0	8	4
2369	1	1279	7	23.1	100	8	5
2369	1	1279	8	22	0	8	6
2369	1	1279	9	20.7	300	8	7
2369	1	1279	10	22.4	100	8	8
2369	1	1279	11	18.9	0	8	9
2370	1	1278	3	22.4	100	8	1
2370	1	1278	4	21.7	0	8	2
2370	1	1278	6	24.3	200	8	4
2370	1	1278	7	23.8	400	8	5
2370	1	1278	10	24.5	200	8	8
2370	1	1278	11	23.9	100	8	9
2371	1	1280	3	22.7	0	5	1
2371	1	1280	6	24.9	300	5	4
2371	1	1280	7	26.3	600	5	5
2371	1	1280	9	27.3	300	5	7
2371	1	1280	10	27.3	200	5	8
2372	1	1282	2	11.2	0	8	0
2372	1	1282	6	23.1	100	8	4
2372	1	1282	7	31.2	200	8	5
2372	1	1282	9	20.7	200	8	7
2372	1	1282	10	20.8	0	8	8
2373	2	1786	2	18	800	6	0
2373	2	1786	3	28.7	400	6	1
2373	2	1786	4	30	200	6	2
2374	1	1272	2	17.2	100	2	0
2374	1	1272	3	24.8	0	2	1
2374	1	1272	4	23.5	0	2	2
2374	1	1272	5	25.1	0	2	3
2374	1	1272	6	27.7	0	2	4
2374	1	1272	9	28.2	100	2	7
2374	1	1272	12	21.8	1300	2	10
2375	1	1488	3	18.3	100	2	1
2375	1	1488	4	17.9	500	2	2
2376	1	1298	3	21.6	300	9	1
2376	1	1298	4	22	0	9	2
2376	1	1298	5	25	0	9	3
2376	1	1298	6	25.4	0	9	4
2376	1	1298	9	24.5	0	9	7
2377	1	1862	3	18	0	8	1
2377	1	1862	4	21.3	100	8	2
2377	1	1862	7	23.2	0	8	5
2377	1	1862	8	23.4	0	8	6
2377	1	1862	10	22.8	0	8	8
2378	1	625	4	24.4	0	13	2
2378	1	625	5	26.2	200	13	3
2378	1	625	6	27.3	100	13	4
2378	1	625	7	27.4	0	13	5
2378	1	625	9	26.3	0	13	7
2378	1	625	10	25.6	0	13	8
2378	1	625	11	26.5	0	13	9
2379	1	949	3	21.6	0	1	1
2380	1	951	4	15.2	1000	1	2
2381	1	1290	2	11.4	100	0	0
2381	1	1290	4	17.2	0	0	2
2414	1	2034	3	19.6	100	12	1
2414	1	2034	6	23.2	0	12	4
2414	1	2034	7	20.2	100	12	5
2414	1	2034	8	22.2	400	12	6
2414	1	2034	10	20.7	200	12	8
2418	1	1753	8	20.4	0	6	5
2419	1	1104	4	21.6	200	2	1
2419	1	1104	6	25.5	100	2	3
2432	1	2034	4	18	800	1	1
2436	1	2020	5	16.1	200	7	2
2436	1	2020	6	25.4	0	7	3
2436	1	2020	7	24.4	200	7	4
2436	1	2020	11	24.3	0	7	8
2438	2	1301	4	14.8	0	0	1
2439	2	1489	8	43.7	100	11	5
2439	2	1489	9	44.8	0	11	6
2439	2	1489	10	45	800	11	6
2439	2	1489	11	41.1	600	11	6
2443	2	1833	4	20.2	200	1	1
2445	1	1298	4	15.9	300	12	1
2445	1	1298	5	20.2	0	12	2
2445	1	1298	6	22.7	200	12	3
2445	1	1298	8	22.4	0	12	5
2445	1	1298	10	23.4	100	12	7
2445	1	1298	11	22.6	0	12	8
2445	1	1298	14	24.6	0	12	11
2448	1	1941	3	14.3	400	0	0
2448	1	1941	4	22.1	100	0	1
2448	1	1941	5	24.3	100	0	2
2448	1	1941	9	30.4	0	0	6
2450	2	1294	3	16.7	200	0	0
2452	1	1862	3	14	0	3	0
2452	1	1862	4	17.8	100	3	1
2452	1	1862	5	19.9	0	3	2
2452	1	1862	6	22.3	1200	3	3
2454	2	1280	3	19.1	400	1	0
2455	2	1106	3	19.1	100	6	0
2456	2	2181	4	22.7	200	2	1
2459	2	1459	3	19	400	0	0
2460	1	1444	5	21.3	100	10	2
2460	1	1444	6	23.6	0	10	3
2460	1	1444	9	24.4	0	10	6
2460	1	1444	11	22.9	0	10	8
2462	1	1864	3	14.6	200	19	0
2462	1	1864	4	15.2	100	19	1
2462	1	1864	6	22.7	0	19	3
2462	1	1864	8	22.8	0	19	5
2462	1	1864	11	22	0	19	8
2462	1	1864	12	22.6	100	19	9
2463	2	1864	3	15.9	100	3	0
2463	2	1864	4	22.6	300	3	1
2465	2	229	3	16.8	100	0	0
2465	2	229	4	27.6	400	0	1
2465	2	229	5	29.8	100	0	2
2466	2	1309	4	11.4	200	0	1
2469	2	1282	3	14.8	200	12	0
2469	2	1282	4	21.7	300	12	1
2470	2	1306	4	26.8	200	1	1
2470	2	1306	5	32	0	1	2
2471	2	2264	4	22.8	300	5	1
2471	2	2264	5	31.6	0	5	2
2473	1	224	4	13.4	200	1	1
2474	2	2021	3	16.8	200	6	0
2474	2	2021	4	24.2	600	6	1
2475	1	1273	8	24.4	0	7	5
2475	1	1273	10	24.3	0	7	7
2476	2	2377	4	14.4	100	1	1
2476	2	2377	5	34.8	0	1	2
2477	2	2269	4	15.4	600	0	1
2478	1	1462	6	21.9	100	7	3
2479	2	1455	3	14.5	0	4	0
2479	2	1455	4	24.4	100	4	1
2479	2	1455	5	33.2	0	4	2
2480	2	2271	4	24.4	1500	2	1
2480	2	2271	5	28.9	0	2	2
2481	2	1279	3	18.5	600	0	0
2482	2	2253	4	24.7	200	14	1
2482	2	2253	5	31.2	0	14	2
2485	2	2077	3	14.1	600	2	0
2485	2	2077	4	20.8	0	2	1
2485	2	2077	5	23.5	200	2	2
2487	2	2375	3	14.5	100	7	0
2487	2	2375	4	23.4	100	7	1
2487	2	2375	5	30.8	0	7	2
2487	2	2375	7	33	600	7	4
2490	2	1754	4	14.2	400	1	1
2491	1	1754	4	16.1	100	1	1
2492	1	1458	4	18.2	100	8	1
2492	1	1458	5	19.2	0	8	2
2492	1	1458	6	20.3	200	8	3
2492	1	1458	10	20.8	100	8	7
2492	1	1458	11	20.5	200	8	8
2493	1	2320	3	12.2	100	0	0
2494	2	1451	3	14.9	0	4	0
2494	2	1451	4	27.8	200	4	1
2495	1	1849	4	17.2	100	1	1
2496	2	2343	4	20.5	100	1	1
2496	2	2343	5	23.4	800	1	2
2496	2	2343	7	29.3	700	1	4
2497	2	1272	4	29	100	7	1
2497	2	1272	5	30.6	0	7	2
2497	2	1272	8	36.1	100	7	5
2497	2	1272	9	38.7	0	7	6
2497	2	1272	10	34.8	300	7	6
2500	2	949	3	17.4	100	8	0
2500	2	949	4	26	100	8	1
2500	2	949	5	31.4	600	8	2
2500	2	949	6	35.5	200	8	3
2501	2	2371	3	14.8	0	1	0
2501	2	2371	4	25.8	700	1	1
2502	1	777	3	16.4	0	1	0
2502	1	777	4	20.8	200	1	1
2503	2	1425	3	21	0	46	0
2503	2	1425	4	29.6	200	46	1
2503	2	1425	5	36.7	0	46	2
2503	2	1425	6	42.9	0	46	3
2503	2	1425	7	42.5	0	46	4
2503	2	1425	8	44.1	0	46	5
2503	2	1425	9	46	200	46	6
2505	2	1443	3	20.6	100	1	0
2506	2	1488	4	24	400	1	1
2508	1	2267	3	12	600	0	0
2510	2	2379	3	13.3	300	1	0
2511	1	221	3	15.7	600	1	0
2511	1	221	4	18.5	0	1	1
2514	1	1786	3	14.4	300	1	0
2514	1	1786	4	18.7	300	1	1
2515	1	1283	3	14.2	100	1	0
2523	1	1860	3	16.6	100	16	0
2523	1	1860	4	23.8	0	16	1
2523	1	1860	5	23.9	100	16	2
2523	1	1860	6	27.4	0	16	3
2523	1	1860	8	30.2	0	16	5
2523	1	1860	9	27.3	0	16	6
2523	1	1860	12	27.6	0	16	9
2527	1	2305	3	12.7	100	0	0
2527	1	2305	4	18	200	0	1
2539	1	236	3	16	100	5	0
2539	1	236	5	21.6	100	5	2
2539	1	236	8	22.6	0	5	5
2540	1	229	3	14.1	100	0	0
2540	1	229	4	21.2	200	0	1
2540	1	229	5	23.6	100	0	2
2540	1	229	16	27.75	0	0	11
2541	1	2035	5	19.5	0	10	2
2541	1	2035	6	22.1	50	10	3
2541	1	2035	7	24.4	400	10	4
2541	1	2035	8	22.9	0	10	5
2541	1	2035	9	22.7	100	10	6
2541	1	2035	10	22.2	500	10	7
2541	1	2035	14	25.3	0	10	11
2541	1	2035	15	25.6	0	10	11
2541	1	2035	16	25.35	0	10	11
2542	1	1277	3	14.9	0	9	0
2542	1	1277	4	20	100	9	1
2542	1	1277	5	22	0	9	2
2542	1	1277	6	22.8	300	9	3
2542	1	1277	7	22.6	300	9	4
2542	1	1277	9	23.4	0	9	6
2542	1	1277	10	23.2	0	9	7
2542	1	1277	12	23.9	0	9	9
2542	1	1277	13	25	0	9	10
2542	1	1277	14	23.2	200	9	11
2543	1	1278	3	16.5	0	1	0
2543	1	1278	5	22.9	0	1	2
2543	1	1278	6	23.1	0	1	3
2544	2	1969	3	18.2	0	1	0
2544	2	1969	4	28.8	100	1	1
2544	2	1969	5	39	0	1	2
2544	2	1969	8	45	0	1	5
2544	2	1969	9	45	700	1	6
2549	1	2364	3	14.2	0	5	0
2549	1	2364	4	20.1	100	5	1
2549	1	2364	5	22	0	5	2
2549	1	2364	6	23.7	100	5	3
2550	2	2378	3	16.4	400	7	0
2550	2	2378	4	25.6	200	7	1
2550	2	2378	5	30.2	600	7	2
2550	2	2378	7	32.6	400	7	4
2551	1	2363	3	13.5	400	2	0
2551	1	2363	4	14.7	0	2	1
2551	1	2363	5	16.7	0	2	2
2551	1	2363	6	15.9	400	2	3
2552	2	227	4	24.4	300	4	1
2552	2	227	5	32	0	4	2
2552	2	227	6	34.3	200	4	3
2552	2	227	7	35.5	1400	4	4
2552	2	227	8	37.6	0	4	5
2552	2	227	9	39.7	300	4	6
2552	2	227	10	36.8	400	4	6
2552	2	227	11	30.9	400	4	6
2553	1	1442	4	18	100	9	1
2553	1	1442	5	21.9	0	9	2
2553	1	1442	6	22.8	0	9	3
2553	1	1442	8	24.3	0	9	5
2553	1	1442	9	23	0	9	6
2553	1	1442	10	22.3	0	9	7
2553	1	1442	11	21.5	0	9	8
2554	2	1451	3	13.8	100	22	0
2554	2	1451	4	25.7	100	22	1
2554	2	1451	5	31.8	0	22	2
2554	2	1451	6	34.6	700	22	3
2555	1	1463	4	18.4	1100	5	1
2555	1	1463	5	19.9	300	5	2
2555	1	1463	6	22.7	600	5	3
2555	1	1463	7	22.5	600	5	4
2556	1	1282	3	14	100	6	0
2556	1	1282	4	20.8	100	6	1
2556	1	1282	6	26.1	200	6	3
2556	1	1282	7	24.7	100	6	4
2558	1	2091	3	14.6	0	8	0
2558	1	2091	5	21.2	100	8	2
2558	1	2091	6	21.5	400	8	3
2558	1	2091	7	22.4	200	8	4
2558	1	2091	9	22.3	0	8	6
2558	1	2091	10	22	0	8	7
2558	1	2091	11	20.5	0	8	8
2559	1	2077	3	12.1	200	5	0
2559	1	2077	4	18.8	100	5	1
2559	1	2077	5	31.7	0	5	2
2559	1	2077	6	24.3	100	5	3
2560	1	1295	4	18.9	100	8	1
2560	1	1295	5	20.4	0	8	2
2560	1	1295	7	22	0	8	4
2560	1	1295	13	25.6	0	8	10
2560	1	1295	14	23.2	200	8	11
2561	1	1865	7	24.6	0	7	4
2561	1	1865	8	24.7	0	7	5
2561	1	1865	11	21.8	0	7	8
2562	1	955	3	15.8	0	5	0
2562	1	955	7	25.2	0	5	4
2562	1	955	8	24.8	0	5	5
2563	1	2099	4	18	400	7	1
2563	1	2099	6	22.8	300	7	3
2563	1	2099	9	24.1	0	7	6
2564	1	2099	4	21.2	400	12	1
2564	1	2099	6	26.5	0	12	3
2564	1	2099	7	26	0	12	4
2564	1	2099	8	26.8	0	12	5
2564	1	2099	11	26.3	200	12	8
2565	1	1455	4	18	100	7	1
2565	1	1455	5	17.4	0	7	2
2565	1	1455	6	22.1	100	7	3
2565	1	1455	7	20.2	0	7	4
2565	1	1455	8	22.3	0	7	5
2565	1	1455	9	23.3	0	7	6
2566	1	1442	4	16.9	0	8	1
2566	1	1442	5	21.4	0	8	2
2566	1	1442	6	22.4	500	8	3
2566	1	1442	8	24.3	200	8	5
2566	1	1442	9	23.3	100	8	6
2566	1	1442	10	20.7	0	8	7
2568	1	2414	3	11.4	0	5	0
2568	1	2414	4	15.2	0	5	1
2568	1	2414	5	21.2	0	5	2
2568	1	2414	6	21.9	200	5	3
2568	1	2414	7	22.6	200	5	4
2568	1	2414	8	23.6	0	5	5
2568	1	2414	9	23.2	0	5	6
2568	1	2414	10	24	0	5	7
2568	1	2414	13	24	0	5	10
2569	1	1452	3	13.1	0	7	0
2569	1	1452	4	19.6	100	7	1
2569	1	1452	5	22.1	400	7	2
2569	1	1452	6	23.2	0	7	3
2569	1	1452	7	23.7	200	7	4
2569	1	1452	8	23.3	0	7	5
2569	1	1452	9	24	0	7	6
2569	1	1452	11	19.5	100	7	8
2570	2	951	4	16	1100	1	1
2570	2	951	5	23.4	0	1	2
2571	1	2275	4	16.9	400	2	1
2571	1	2275	5	21	0	2	2
2571	1	2275	6	21.3	100	2	3
2571	1	2275	7	17.4	1400	2	4
2572	2	774	4	27.4	300	18	1
2572	2	774	5	31.8	0	18	2
2572	2	774	7	35.8	300	18	4
2573	1	2085	4	21	0	11	1
2573	1	2085	5	23.5	0	11	2
2573	1	2085	6	26.2	0	11	3
2573	1	2085	7	24.9	0	11	4
2573	1	2085	9	25	0	11	6
2574	1	2367	3	12.6	0	8	0
2574	1	2367	6	24.3	200	8	3
2574	1	2367	7	23.9	100	8	4
2575	1	1957	3	15.8	100	10	0
2575	1	1957	4	19	100	10	1
2575	1	1957	5	19.9	0	10	2
2575	1	1957	7	23.3	0	10	4
2575	1	1957	8	22	0	10	5
2575	1	1957	9	22.7	0	10	6
2576	1	1452	3	12.4	0	7	0
2576	1	1452	5	21.1	0	7	2
2576	1	1452	7	23.7	200	7	4
2576	1	1452	8	23.5	0	7	5
2576	1	1452	9	23.9	0	7	6
2576	1	1452	10	24.2	0	7	7
2576	1	1452	11	22	0	7	8
2578	1	2273	3	15	100	4	0
2578	1	2273	6	25.4	100	4	3
2578	1	2273	7	24.7	200	4	4
2578	1	2273	9	24.1	0	4	6
2578	1	2273	10	25.5	0	4	7
2578	1	2273	11	22.5	0	4	8
2578	1	2273	14	24.6	0	4	11
2579	1	2080	3	17.1	200	11	0
2579	1	2080	5	21.9	0	11	2
2579	1	2080	6	23.9	0	11	3
2579	1	2080	8	25.2	0	11	5
2579	1	2080	9	25.2	0	11	6
2579	1	2080	10	24	100	11	7
2579	1	2080	12	23.9	0	11	9
2579	1	2080	13	23.7	100	11	10
2579	1	2080	14	23.3	0	11	11
2590	1	947	4	13.1	200	1	0
2590	1	947	5	12.2	1400	1	1
2593	2	1280	4	16.7	300	1	0
2593	2	1280	5	23.7	600	1	1
2593	2	1280	6	29.2	200	1	2
2597	1	1443	4	14.9	0	0	0
2601	1	1304	6	20.3	100	9	2
2601	1	1304	10	21	300	9	6
2601	1	1304	13	24.2	0	9	9
2606	2	2035	4	13.6	1500	0	0
2608	1	2445	4	8.8	100	0	0
2609	1	625	4	15.7	100	8	0
2609	1	625	5	20.2	100	8	1
2609	1	625	6	21.7	0	8	2
2609	1	625	7	22.8	200	8	3
2609	1	625	8	24.6	0	8	4
2609	1	625	9	24.3	0	8	5
2609	1	625	10	22	100	8	6
2609	1	625	11	22.3	200	8	7
2614	1	2376	4	14.2	100	4	0
2614	1	2376	5	16.1	200	4	1
2617	1	1104	4	15.3	0	3	0
2617	1	1104	6	22.7	200	3	2
2617	1	1104	7	25.3	0	3	3
2617	1	1104	8	23.6	200	3	4
2617	1	1104	9	26.2	0	3	5
2617	1	1104	11	21.8	0	3	7
2620	1	777	4	13.2	200	1	0
2621	1	777	4	11.6	0	9	0
2621	1	777	5	16.5	100	9	1
2621	1	777	6	20.8	0	9	2
2621	1	777	7	21.8	0	9	3
2621	1	777	8	22.8	0	9	4
2621	1	777	9	21.8	0	9	5
2621	1	777	10	21.4	200	9	6
2621	1	777	11	20.9	0	9	7
2622	2	2363	4	14.9	400	0	0
2624	2	1488	4	12.6	500	0	0
2631	1	955	4	14	0	4	0
2631	1	955	5	16.6	0	4	1
2631	1	955	6	20.4	0	4	2
2631	1	955	7	20.4	0	4	3
2632	2	2266	4	16	500	0	0
2632	2	2266	5	19.9	200	0	1
2634	2	2563	4	11.8	600	0	0
2635	2	1297	4	18.2	400	0	0
2636	1	2025	4	11.7	600	0	0
2637	1	2025	4	10.6	200	0	0
2640	2	2099	4	13.5	100	0	0
2641	1	2099	4	13.2	100	0	0
2642	1	2343	4	11.2	200	0	0
2644	2	1298	5	22.6	600	14	1
2647	1	1301	4	14.7	300	9	0
2647	1	1301	5	20.4	300	9	1
2647	1	1301	6	21.3	0	9	2
2647	1	1301	7	24	0	9	3
2647	1	1301	8	25	100	9	4
2648	2	1301	4	15	400	0	0
2650	2	1442	4	14.2	0	0	0
2651	1	2364	4	12.4	100	0	0
2652	2	2364	4	12.7	900	1	0
2656	1	2378	4	14.9	1300	0	0
2657	1	2372	4	14.1	300	0	0
2659	2	1941	4	18.2	400	7	0
2659	2	1941	5	23.5	600	7	1
2659	2	1941	8	38.6	0	7	4
2659	2	1941	11	37.7	300	7	6
2660	1	1459	4	15	0	10	0
2660	1	1459	5	18	0	10	1
2660	1	1459	6	22.2	100	10	2
2660	1	1459	8	23.7	300	10	4
2660	1	1459	9	23.2	200	10	5
2660	1	1459	10	23.5	400	10	6
2660	1	1459	11	21.9	0	10	7
2660	1	1459	12	24.1	500	10	8
2660	1	1459	14	20.9	0	10	10
2661	1	1290	4	11.4	500	0	0
2662	1	1290	6	21.4	0	3	2
2665	1	227	6	22.4	600	5	2
2666	1	1106	4	12.6	100	0	0
2667	1	1106	4	13.2	200	0	0
2668	2	1864	4	15.2	0	0	0
2669	2	1864	4	14.4	800	0	0
2671	1	1957	4	12.8	100	0	0
2672	2	2087	4	16.4	500	0	0
2673	1	2087	4	14.2	500	1	0
2675	1	2475	9	28.5	0	0	5
2675	1	2475	13	29.7	0	0	9
2675	1	2475	15	27.4	100	0	11
2676	1	2368	8	24	100	2	4
2676	1	2368	9	20.9	0	2	5
2676	1	2368	11	20.9	0	2	7
2679	1	2276	4	15.7	100	9	0
2679	1	2276	5	19.2	0	9	1
2679	1	2276	6	23	300	9	2
2679	1	2276	8	24.5	200	9	4
2679	1	2276	9	24.7	100	9	5
2679	1	2276	11	23.6	0	9	7
2679	1	2276	12	26.3	100	9	8
2680	1	2377	4	14.1	200	1	0
2681	2	1295	4	12.6	200	0	0
2683	1	1969	4	12.2	400	0	0
2684	1	1969	4	14.2	300	0	0
2687	2	1272	4	17.8	200	4	0
2687	2	1272	5	20.4	400	4	1
2688	2	2367	4	15.1	200	1	0
2688	2	2367	5	20.1	700	1	1
2688	2	2367	8	27.9	100	1	4
2688	2	2367	9	32.4	300	1	5
2689	1	1455	4	12.3	0	0	0
2690	1	1455	4	11.2	800	0	0
2694	2	229	4	18	100	6	0
2694	2	229	5	20.9	600	6	1
2694	2	229	8	40	0	6	4
2694	2	229	10	41	200	6	6
2694	2	229	11	34.4	100	6	6
2695	1	2553	4	9.2	0	0	0
2696	2	1309	4	13.4	600	0	0
2697	2	1309	4	11.4	1900	0	0
2698	1	1462	4	17.6	300	0	0
2702	2	2566	4	10.2	600	0	0
2704	1	1860	4	16	200	1	0
2705	1	1283	4	11.6	100	4	0
2705	1	1283	7	22.5	0	4	3
2705	1	1283	8	21.5	100	4	4
2705	1	1283	9	22.7	200	4	5
2705	1	1283	13	21.4	800	4	9
2708	1	2020	4	13.9	100	0	0
2709	2	2020	4	15.2	100	0	0
2709	2	2020	5	22.3	0	0	1
2710	1	2574	4	12	400	0	0
2716	2	2080	4	17.2	100	0	0
2717	2	2264	4	16.8	100	0	0
2717	2	2264	5	20.8	0	0	1
2717	2	2264	6	29.1	600	0	2
2719	2	1754	4	17.9	500	0	0
2720	2	1863	4	18.5	1100	2	0
2720	2	1863	5	22.5	200	2	1
2720	2	1863	7	31.6	1100	2	3
2721	2	2375	4	14.3	400	0	0
2723	1	1279	4	16	100	5	0
2723	1	1279	5	15	0	5	1
2723	1	1279	6	18.9	200	5	2
2723	1	1279	7	19.8	400	5	3
2725	2	1452	4	14.3	300	0	0
2726	1	2462	4	10.3	300	0	0
2727	1	2515	4	9.6	200	0	0
2728	2	2082	4	16.2	100	1	0
2730	2	951	4	6.7	200	0	0
2732	1	1753	9	19.7	400	3	5
2734	1	1984	4	15.4	100	6	0
2734	1	1984	5	19.6	0	6	1
2734	1	1984	6	22.5	100	6	2
2734	1	1984	7	23.1	200	6	3
2734	1	1984	9	25.2	100	6	5
2734	1	1984	10	22.5	300	6	6
2734	1	1984	11	19.6	200	6	7
2736	1	221	4	14.2	600	7	0
2736	1	221	5	18.6	0	7	1
2736	1	221	6	21	100	7	2
2736	1	221	7	22.6	300	7	3
2736	1	221	8	25.1	0	7	4
2736	1	221	10	22.4	0	7	6
2736	1	221	11	23.1	0	7	7
2737	1	1446	4	15.8	200	0	0
2739	2	2273	4	14	1500	0	0
2740	2	2085	5	22.9	100	30	1
2740	2	2085	7	34.6	200	30	3
2740	2	2085	10	39.5	300	30	6
2741	2	2370	4	15	500	0	0
2742	1	2514	4	9.6	300	0	0
2743	1	2511	4	11.7	300	0	0
2744	1	1425	4	15.6	100	0	0
2745	1	949	4	14.6	100	5	0
2745	1	949	5	18.7	0	5	1
2745	1	949	6	22.2	0	5	2
2745	1	949	7	23.9	500	5	3
2745	1	949	8	23.2	300	5	4
2745	1	949	9	22.8	100	5	5
2745	1	949	10	22.6	400	5	6
2745	1	949	11	21.3	400	5	7
2747	2	232	4	13.9	400	0	0
2748	1	1102	4	10.8	400	0	0
2749	1	1752	4	12.4	300	10	0
2749	1	1752	5	16	400	10	1
2749	1	1752	13	23.6	100	10	9
2750	2	1752	4	14	300	0	0
2750	2	1752	5	17.7	500	0	1
2756	1	2419	4	13	200	0	0
2769	1	230	4	17.9	200	3	0
2769	1	230	5	19.6	300	3	1
2771	1	2320	5	18.3	0	6	1
2771	1	2320	6	24.3	200	6	2
2771	1	2320	8	22.9	0	6	4
2771	1	2320	11	21.4	100	6	7
2772	1	1105	4	16.8	100	7	0
2772	1	1105	5	22.8	0	7	1
2772	1	1105	6	25	0	7	2
2772	1	1105	7	23.9	0	7	3
2772	1	1105	8	25.7	0	7	4
2772	1	1105	9	26	100	7	5
2772	1	1105	10	25.3	300	7	6
2772	1	1105	11	26.1	0	7	7
2796	2	2370	5	12.9	200	2	0
2800	2	1754	5	12.1	200	0	0
2800	2	1754	6	24.7	500	0	1
2800	2	1754	7	27.6	300	0	2
2801	1	1425	7	16	300	0	2
2801	1	1425	8	17	0	0	3
2801	1	1425	10	16	0	0	5
2802	2	2445	5	14.2	0	0	0
2805	2	2549	6	21.2	100	1	1
2805	2	2549	7	28	100	1	2
2806	2	2378	5	12.6	300	6	0
2806	2	2378	6	24.8	600	6	1
2806	2	2378	7	29.7	300	6	2
2806	2	2378	8	36.4	0	6	3
2806	2	2378	9	34.7	0	6	4
2806	2	2378	10	34.5	300	6	5
2807	1	2523	5	12.2	0	10	0
2807	1	2523	6	16.5	100	10	1
2807	1	2523	8	20.6	100	10	3
2807	1	2523	9	20.7	100	10	4
2807	1	2523	10	22.6	0	10	5
2807	1	2523	14	21.1	100	10	9
2808	1	2575	5	12.1	0	1	0
2808	1	2575	6	13.7	0	1	1
2810	1	2346	10	18	0	4	5
2811	1	224	9	26.3	0	5	4
2811	1	224	10	24.3	0	5	5
2812	1	224	10	21.2	200	5	5
2812	1	224	11	20.5	100	5	6
2813	2	2462	5	11.3	700	0	0
2814	2	1941	5	16.9	0	26	0
2814	2	1941	6	25.5	400	26	1
2814	2	1941	7	30.3	700	26	2
2814	2	1941	10	36.4	100	26	5
2816	2	2082	5	15.7	100	2	0
2817	1	777	5	11.1	100	9	0
2817	1	777	6	19	0	9	1
2817	1	777	7	22.4	100	9	2
2817	1	777	8	23.1	0	9	3
2817	1	777	10	23.1	0	9	5
2817	1	777	11	23.8	0	9	6
2818	2	1957	5	17.7	2900	1	0
2819	2	1442	6	21.4	500	0	1
2820	1	1297	5	14.1	300	1	0
2820	1	1297	6	19.1	200	1	1
2821	2	2460	5	12	600	0	0
2821	2	2460	6	19.1	200	0	1
2823	1	2364	5	10.6	0	7	0
2823	1	2364	6	15.7	0	7	1
2823	1	2364	8	19.7	0	7	3
2823	1	2364	9	19	0	7	4
2823	1	2364	10	21.2	0	7	5
2823	1	2364	11	19.9	0	7	6
2824	2	1459	5	12.3	200	5	0
2824	2	1459	6	21.7	800	5	1
2824	2	1459	7	25.6	1200	5	2
2824	2	1459	9	30.7	900	5	4
2824	2	1459	10	32.4	900	5	5
2827	1	1273	9	27.1	0	13	4
2827	1	1273	13	29	0	13	8
2827	1	1273	15	27.2	100	13	10
2829	1	2343	5	8.8	100	0	0
2831	1	2275	5	11.6	100	10	0
2831	1	2275	6	15	100	10	1
2831	1	2275	7	19	200	10	2
2831	1	2275	8	18.2	200	10	3
2831	1	2275	9	20	0	10	4
2832	1	1456	5	13.8	600	5	0
2832	1	1456	9	24.3	0	5	4
2833	2	1752	5	13.3	1700	0	0
2834	1	1105	5	16.5	200	0	0
2835	2	2563	6	22	300	3	1
2835	2	2563	7	27.4	600	3	2
2837	1	1280	5	12.6	100	9	0
2837	1	1280	6	17	0	9	1
2837	1	1280	7	20.2	300	9	2
2837	1	1280	8	22.7	200	9	3
2837	1	1280	11	19.3	0	9	6
2838	1	2553	5	11.9	100	0	0
2840	1	2564	7	21.5	0	13	2
2840	1	2564	10	24	200	13	5
2840	1	2564	11	22.4	0	13	6
2840	1	2564	14	23.2	0	13	9
2840	1	2564	17	22.4	50	13	11
2841	1	2087	6	17.4	800	7	1
2841	1	2087	8	22.9	200	7	3
2841	1	2087	9	21.8	0	7	4
2841	1	2087	10	21.5	800	7	5
2842	2	1458	5	14.7	700	0	0
2843	1	2085	5	15.9	0	1	0
2844	1	1862	5	14.9	0	5	0
2844	1	1862	6	20.4	0	5	1
2844	1	1862	7	22	0	5	2
2844	1	1862	8	23.9	100	5	3
2845	2	1272	5	15.8	600	8	0
2845	2	1272	6	24.5	300	8	1
2845	2	1272	7	29.8	200	8	2
2845	2	1272	9	33.3	0	8	4
2845	2	1272	10	33.4	100	8	5
2845	2	1272	12	33.9	300	8	6
2845	2	1272	13	34.2	200	8	6
2848	2	1865	6	18.4	300	4	1
2848	2	1865	7	26.3	200	4	2
2849	2	1110	5	12.4	400	0	0
2849	2	1110	6	18.8	1200	0	1
2850	2	1455	5	15.6	0	0	0
2850	2	1455	7	33.5	100	0	2
2851	1	234	10	21.8	0	6	5
2853	1	1304	9	24.1	0	5	4
2854	2	1849	5	14.9	200	2	0
2855	2	2080	5	15.8	800	0	0
2858	1	1488	5	15.4	0	7	0
2858	1	1488	6	19.7	0	7	1
2858	1	1488	7	22.5	400	7	2
2858	1	1488	8	24.1	0	7	3
2858	1	1488	9	23.4	0	7	4
2858	1	1488	10	21.4	100	7	5
2859	1	2537	9	23.3	0	4	4
2859	1	2537	12	23.9	300	4	7
2860	2	1451	5	16.2	100	0	0
2861	2	1444	5	15.8	100	11	0
2861	2	1444	6	22.8	200	11	1
2861	2	1444	9	33.1	200	11	4
2861	2	1444	10	30.6	0	11	5
2862	2	2091	5	17.1	100	30	0
2862	2	2091	6	25.4	1000	30	1
2863	1	2367	5	11.4	1400	1	0
2863	1	2367	6	15.6	0	1	1
2864	1	1753	5	6.8	300	0	0
2866	1	2269	6	20.4	0	5	1
2866	1	2269	7	24.6	0	5	2
2866	1	2269	8	25.9	100	5	3
2867	2	2369	5	14.3	700	0	0
2868	1	2276	5	12.8	200	10	0
2868	1	2276	6	17.2	300	10	1
2868	1	2276	8	23.1	0	10	3
2868	1	2276	9	24.2	0	10	4
2868	1	2276	11	22.7	0	10	6
2868	1	2276	12	24.1	0	10	7
2869	2	2377	5	10.2	300	1	0
2869	2	2377	6	20	100	1	1
2870	2	1446	5	12.4	1500	2	0
2871	1	1446	5	11.1	300	2	0
2871	1	1446	7	21.2	800	2	2
2872	2	1786	5	14	0	1	0
2872	2	1786	6	23.3	500	1	1
2873	1	1786	6	17.8	300	5	1
2873	1	1786	7	21.7	100	5	2
2873	1	1786	8	23.5	200	5	3
2873	1	1786	9	22.6	0	5	4
2873	1	1786	10	22.6	0	5	5
2873	1	1786	11	22.3	0	5	6
2873	1	1786	12	23.7	100	5	7
2873	1	1786	14	24.9	100	5	9
2874	2	2368	6	21.4	900	0	1
2874	2	2368	7	25	400	0	2
2875	2	2492	5	13	100	0	0
2875	2	2492	6	12.6	2000	0	1
2876	1	2076	5	13.6	200	9	0
2876	1	2076	6	19.8	0	9	1
2876	1	2076	7	21	500	9	2
2876	1	2076	8	23	600	9	3
2876	1	2076	9	24.6	0	9	4
2876	1	2076	10	22.6	0	9	5
2877	2	236	5	12.2	1200	2	0
2877	2	236	6	19.4	800	2	1
2877	2	236	7	26	800	2	2
2878	2	2077	5	11.9	400	0	0
2879	1	221	5	10.7	200	0	0
2880	2	2181	5	10.9	500	11	0
2880	2	2181	6	22.1	400	11	1
2880	2	2181	7	26.2	800	11	2
2882	2	2569	5	8.1	0	2	0
2882	2	2569	6	19.8	1100	2	1
2883	1	230	5	11.3	400	12	0
2883	1	230	7	23.7	0	12	2
2883	1	230	11	26.3	0	12	6
2883	1	230	14	27.7	0	12	9
2885	2	2273	5	14	200	3	0
2885	2	2273	6	23.7	100	3	1
2885	2	2273	7	26.7	500	3	2
2885	2	2273	8	34.2	0	3	3
2885	2	2273	9	36.8	200	3	4
2886	1	2034	5	13.8	300	12	0
2886	1	2034	7	19.4	200	12	2
2886	1	2034	8	21	0	12	3
2886	1	2034	9	22.9	200	12	4
2886	1	2034	10	22.1	0	12	5
2888	1	1864	5	13.6	100	4	0
2888	1	1864	6	19.3	200	4	1
2888	1	1864	8	21.5	0	4	3
2888	1	1864	9	21.9	100	4	4
2895	1	2273	5	7.4	600	5	0
2895	1	2273	6	15	500	5	1
2895	1	2273	7	17.8	500	5	2
2895	1	2273	8	19.1	200	5	3
2895	1	2273	9	19	0	5	4
2895	1	2273	10	19.6	0	5	5
2895	1	2273	11	17.6	100	5	6
2896	2	1289	5	9.4	100	0	0
2896	2	1289	6	13.8	600	0	1
2897	1	2364	6	17.1	300	8	1
2897	1	2364	7	18	200	8	2
2897	1	2364	8	20.7	100	8	3
2897	1	2364	9	20.2	0	8	4
2897	1	2364	10	21.8	100	8	5
2898	1	1860	5	14.6	0	7	0
2898	1	1860	6	18.5	200	7	1
2898	1	1860	8	22.5	100	7	3
2898	1	1860	10	23.5	100	7	5
2898	1	1860	12	24	0	7	7
2899	1	2266	5	12.3	300	12	0
2899	1	2266	6	16.9	200	12	1
2899	1	2266	8	20	100	12	3
2899	1	2266	9	21.5	0	12	4
2899	1	2266	11	20.4	0	12	6
2899	1	2266	12	21.6	0	12	7
2899	1	2266	16	19.7	0	12	11
2900	2	2077	5	9.8	600	2	0
2900	2	2077	6	18.9	700	2	1
2900	2	2077	7	24.7	800	2	2
2903	1	2020	6	16.3	200	6	1
2903	1	2020	8	23.1	0	6	3
2903	1	2020	11	22.5	0	6	6
2903	1	2020	12	22.9	0	6	7
2903	1	2020	14	21.3	100	6	9
2904	2	1301	6	25.7	100	11	1
2904	2	1301	7	31	300	11	2
2906	1	615	5	14.8	0	14	0
2906	1	615	7	21.7	0	14	2
2906	1	615	8	24.2	0	14	3
2906	1	615	9	25.7	0	14	4
2906	1	615	11	22.5	0	14	6
2906	1	615	12	24.1	0	14	7
2906	1	615	13	24	200	14	8
2906	1	615	14	22.9	0	14	9
2906	1	615	15	24.5	100	14	10
2906	1	615	16	24.2	0	14	11
2906	1	615	17	22	0	14	11
2907	1	2271	5	13.1	800	13	0
2907	1	2271	6	18.1	150	13	1
2907	1	2271	7	20.6	400	13	2
2907	1	2271	8	20.2	0	13	3
2907	1	2271	9	25	0	13	4
2907	1	2271	10	24.7	0	13	5
2907	1	2271	11	24	100	13	6
2907	1	2271	15	23.8	0	13	10
2982	2	2617	6	15.5	0	0	0
2984	1	2419	6	16.2	0	9	0
2984	1	2419	7	19.6	100	9	1
2984	1	2419	9	24.1	100	9	3
2984	1	2419	10	23.6	100	9	4
2984	1	2419	11	23.7	0	9	5
2984	1	2419	12	26.4	100	9	6
2984	1	2419	13	25.8	0	9	7
2984	1	2419	14	26	0	9	8
2984	1	2419	15	26	300	9	9
2984	1	2419	17	22.75	400	9	11
2985	1	2371	6	12.5	200	0	0
2986	1	2371	6	10.7	1600	0	0
2987	1	2567	6	15.4	0	15	0
2987	1	2567	8	23	200	15	2
2987	1	2567	9	23.5	0	15	3
2987	1	2567	10	25.3	200	15	4
2987	1	2567	11	25.1	0	15	5
2987	1	2567	12	25.5	0	15	6
2987	1	2567	13	25.7	0	15	7
2987	1	2567	14	25.7	0	15	8
2987	1	2567	15	25.5	100	15	9
2987	1	2567	16	26.15	200	15	10
2987	1	2567	17	24.2	0	15	11
2987	1	2567	18	21.25	100	15	11
2992	1	2614	10	22.4	100	4	4
2994	1	2631	6	14.6	300	0	0
2995	2	2579	6	17.7	600	16	0
2995	2	2579	8	33.5	100	16	2
2995	2	2579	9	39.4	0	16	3
2995	2	2579	10	38.2	400	16	4
2996	2	2376	6	19.4	100	0	0
2999	1	2660	6	10.5	200	5	0
2999	1	2660	8	20.8	500	5	2
2999	1	2660	10	22.5	0	5	4
2999	1	2660	11	20.9	0	5	5
3000	1	1298	7	19.7	300	13	1
3000	1	1298	9	24.4	200	13	3
3000	1	1298	16	25.75	0	13	10
3000	1	1298	17	21.85	0	13	11
3001	2	2460	6	17.8	300	2	0
3002	2	2556	6	11.6	400	0	0
3003	1	2556	6	11.9	1200	0	0
3004	1	2564	6	15	200	9	0
3004	1	2564	9	22	300	9	3
3006	1	2364	6	12.6	1300	0	0
3007	1	2563	6	16.6	900	17	0
3007	1	2563	7	21.5	1000	17	1
3007	1	2563	8	25.7	200	17	2
3007	1	2563	9	25.7	300	17	3
3008	2	1446	6	13.2	1300	0	0
3009	1	1446	6	11.8	900	0	0
3011	2	2346	6	17	200	0	0
3012	2	2679	6	16.9	900	3	0
3012	2	2679	8	28.2	600	3	2
3012	2	2679	9	38.2	300	3	3
3012	2	2679	10	33.5	300	3	4
3017	2	2609	6	15.9	200	7	0
3017	2	2609	8	35.4	100	7	2
3017	2	2609	10	41	600	7	4
3017	2	2609	11	38.4	400	7	5
3018	2	2372	6	21	1000	0	0
3019	1	2749	10	22.4	100	8	4
3019	1	2749	13	23	100	8	7
3022	2	2363	6	18	200	0	0
3023	1	777	6	10.1	500	0	0
3024	1	777	6	10.6	1500	0	0
3029	1	2662	6	13.9	0	11	0
3029	1	2662	8	23.4	100	11	2
3029	1	2662	12	23.1	0	11	6
3029	1	2662	14	22.5	0	11	8
3030	1	2266	6	15	0	9	0
3030	1	2266	9	23	0	9	3
3030	1	2266	11	22.3	0	9	5
3033	1	2370	6	14.9	800	0	0
3034	1	2553	7	18.1	500	17	1
3034	1	2553	8	22.8	100	17	2
3034	1	2553	9	23.1	100	17	3
3034	1	2553	10	18	500	17	4
3034	1	2553	11	23.1	0	17	5
3034	1	2553	12	25.2	0	17	6
3034	1	2553	13	25.1	300	17	7
3034	1	2553	14	24.9	300	17	8
3034	1	2553	16	27.15	400	17	10
3034	1	2553	17	23	0	17	11
3041	1	1455	6	15	500	5	0
3041	1	1455	7	18.4	100	5	1
3041	1	1455	8	22.5	100	5	2
3041	1	1455	10	23.8	0	5	4
3041	1	1455	12	23.9	0	5	6
3042	1	1864	6	16.2	400	7	0
3042	1	1864	8	25.3	0	7	2
3042	1	1864	9	22.5	500	7	3
3042	1	1864	10	24.5	100	7	4
3043	1	1273	9	25	0	5	3
3045	1	2025	7	17.2	200	1	1
3046	1	2436	6	13.4	300	0	0
3047	1	2365	6	15.8	200	8	0
3047	1	2365	9	24.2	0	8	3
3047	1	2365	11	23	0	8	5
3047	1	2365	12	26.5	0	8	6
3047	1	2365	14	22.7	0	8	8
3048	2	2523	6	13	700	1	0
3050	2	1425	6	17.8	200	0	0
3050	2	1425	8	30.8	0	0	2
3051	2	2566	6	16.9	200	0	0
3051	2	2566	7	22.2	200	0	1
3052	2	2843	6	10.2	400	4	0
3052	2	2843	7	15.2	300	4	1
3052	2	2843	8	21.1	400	4	2
3053	1	2772	6	13.6	800	8	0
3053	1	2772	8	20.7	100	8	2
3053	1	2772	9	20.9	100	8	3
3053	1	2772	10	18.7	300	8	4
3053	1	2772	11	20.6	0	8	5
3053	1	2772	12	22.7	100	8	6
3054	1	2541	6	11.9	1400	0	0
3056	2	1456	8	30.9	100	3	2
3056	2	1456	9	35.7	200	3	3
3056	2	1456	10	38.5	300	3	4
3056	2	1456	11	36.3	300	3	5
3057	2	2099	6	15.3	200	0	0
3058	2	2099	6	17.6	300	0	0
3058	2	2099	7	20.2	200	0	1
3058	2	2099	10	39.2	500	0	4
3060	1	2575	7	17	400	11	1
3060	1	2575	9	23	0	11	3
3060	1	2575	10	22.4	0	11	4
3060	1	2575	11	22.6	0	11	5
3060	1	2575	12	23.5	0	11	6
3060	1	2575	14	23.1	0	11	8
3060	1	2575	17	20	100	11	11
3061	1	1459	6	15.7	300	11	0
3061	1	1459	8	24.6	500	11	2
3061	1	1459	9	24.2	0	11	3
3061	1	1459	11	23.5	0	11	5
3061	1	1459	14	24.3	200	11	8
3063	2	2452	6	18.7	200	0	0
3064	2	2574	6	16.6	1000	1	0
3066	1	2414	6	10	2500	0	0
3067	1	2414	6	11.2	300	0	0
3068	1	2369	6	17	500	0	0
3068	1	2369	8	22.4	400	0	2
3068	1	2369	9	21.5	0	0	3
3068	1	2369	10	26.2	0	0	4
3068	1	2369	11	27.6	0	0	5
3068	1	2369	12	27.5	0	0	6
3068	1	2369	13	27.8	100	0	7
3068	1	2369	14	28.9	0	0	8
3068	1	2369	15	27.6	0	0	9
3068	1	2369	16	28.8	0	0	10
3068	1	2369	17	27.65	0	0	11
3068	1	2369	18	26.2	1200	0	11
3069	2	2568	6	12.1	2000	0	0
3070	1	2568	6	10.6	600	0	0
3071	1	2723	6	12.3	400	2	0
3071	1	2723	7	18	200	2	1
3071	1	2723	9	23.2	100	2	3
3071	1	2723	10	23.4	0	2	4
3071	1	2723	11	21.4	0	2	5
3073	1	2367	6	13.2	200	8	0
3073	1	2367	8	18.7	300	8	2
3073	1	2367	10	19.8	0	8	4
3073	1	2367	11	18.8	0	8	5
3073	1	2367	12	19.3	0	8	6
3075	2	2906	6	10.2	200	0	0
3080	2	2368	8	28.3	400	1	2
3080	2	2368	11	30.4	300	1	5
3081	1	2555	6	11.3	1800	0	0
3082	1	2665	6	12.4	500	0	0
3084	2	2020	8	28.9	200	6	2
3084	2	2020	9	32.9	0	6	3
3085	1	2377	6	16.6	0	4	0
3087	1	2269	6	10.8	800	0	0
3088	2	1860	6	14.9	200	0	0
3092	1	1865	9	22.3	200	10	3
3092	1	1865	11	21.7	0	10	5
3092	1	1865	12	21.5	200	10	6
3092	1	1865	13	22.8	0	10	7
3093	1	1442	6	11.5	700	0	0
3094	2	1442	6	12.5	300	0	0
3094	2	1442	7	14	1700	0	1
3098	1	1462	6	12.7	700	3	0
3098	1	1462	8	20.8	100	3	2
3098	1	1462	10	23.2	300	3	4
3099	1	1462	6	12.7	100	4	0
3099	1	1462	10	23.4	100	4	4
3099	1	1462	11	22.9	0	4	5
3103	1	2539	8	20.7	0	6	2
3103	1	2539	9	22.4	50	6	3
3106	1	2478	6	14.7	0	2	0
3106	1	2478	7	17	200	2	1
3106	1	2478	8	20.9	200	2	2
3106	1	2478	11	21.5	0	2	5
3108	1	230	8	22.3	200	18	2
3108	1	230	10	23.3	100	18	4
3108	1	230	12	23.5	100	18	6
3108	1	230	14	22.2	50	18	8
3109	1	2736	6	14.6	1000	1	0
3110	2	2080	6	17.4	100	0	0
3111	2	2445	6	15	600	0	0
3112	1	1488	6	10.6	200	0	0
3113	2	1488	6	12.6	400	0	0
3114	2	2542	6	16.6	500	0	0
3115	2	2734	6	17.3	0	0	0
3116	1	1754	6	11.4	500	0	0
3116	1	1754	7	13.9	100	0	1
3117	2	1754	6	11	600	0	0
3119	2	2863	6	10.3	100	0	0
3120	2	2077	6	14.2	400	0	0
3121	1	2077	7	19.5	200	5	1
3121	1	2077	8	20.7	200	5	2
3122	1	2647	6	12.2	200	0	0
3126	1	1279	6	11.2	600	0	0
3127	1	1279	7	15.8	200	10	1
3127	1	1279	9	18.1	200	10	3
3127	1	1279	10	22.4	400	10	4
3127	1	1279	11	19.1	100	10	5
3127	1	1279	12	21.2	400	10	6
3127	1	1279	14	22.5	200	10	8
3127	1	1279	15	20	600	10	9
3127	1	1279	16	20.55	900	10	10
3128	2	2558	6	17.5	0	1	0
3131	1	1309	7	16.4	400	9	1
3131	1	1309	8	19.1	400	9	2
3131	1	1309	9	21.2	100	9	3
3131	1	1309	11	21.3	0	9	5
3131	1	1309	14	20.9	0	9	8
3132	2	2273	6	14.8	600	0	0
3133	2	1984	9	41.4	100	15	3
3133	2	1984	10	40.2	300	15	4
3135	2	2034	6	15	600	0	0
3139	1	2898	6	5.4	200	0	0
3140	2	2837	6	9.6	700	0	0
3141	1	2551	6	14.5	800	12	0
3141	1	2551	7	18.4	100	12	1
3141	1	2551	8	24.8	300	12	2
3141	1	2551	9	24.7	200	12	3
3141	1	2551	10	24.8	200	12	4
3141	1	2551	11	24.7	0	12	5
3141	1	2551	12	21.3	0	12	6
3142	1	2085	6	13.9	300	9	0
3142	1	2085	7	19.3	100	9	1
3142	1	2085	9	25	0	9	3
3142	1	2085	10	25.2	200	9	4
3142	1	2085	11	25.5	0	9	5
3142	1	2085	14	24.8	0	9	8
3144	1	1110	6	6.2	1800	0	0
3145	2	2276	6	18.9	300	3	0
3146	2	2569	6	15.2	400	1	0
3147	1	2076	6	13.7	200	1	0
3149	2	2771	6	14.5	0	0	0
3151	2	2745	6	14.3	700	0	0
3152	2	239	6	17.2	1000	0	0
3156	1	2543	6	14.2	200	0	0
3162	2	2565	6	15.2	400	0	0
3163	1	2577	6	15.7	0	8	0
3163	1	2577	7	21.9	0	8	1
3163	1	2577	9	25.6	100	8	3
3163	1	2577	10	26.8	0	8	4
3163	1	2577	11	24.6	0	8	5
3163	1	2577	12	29.3	0	8	6
3163	1	2577	13	29.6	0	8	7
3163	1	2577	14	27.9	0	8	8
3164	1	2273	6	12.3	300	4	0
3164	1	2273	7	15	200	4	1
3164	1	2273	8	21	100	4	2
3164	1	2273	10	22.8	600	4	4
3164	1	2273	11	20.5	400	4	5
3202	1	2376	8	15.1	300	9	1
3202	1	2376	9	20.3	200	9	2
3202	1	2376	10	22	0	9	3
3202	1	2376	12	22.6	50	9	5
3202	1	2376	16	20.6	200	9	9
3205	2	2560	7	16.4	400	0	0
3208	1	2631	7	13.5	500	0	0
3209	1	2445	9	19.3	200	10	2
3209	1	2445	10	20.6	0	10	3
3209	1	2445	11	19.5	0	10	4
3209	1	2445	12	21.3	0	10	5
3209	1	2445	14	21.7	0	10	7
3209	1	2445	17	20.35	0	10	10
3211	1	2558	7	12	900	0	0
3212	1	2563	7	15.4	200	0	0
3213	2	2564	7	17.6	2200	0	0
3214	1	2025	7	13.6	500	3	0
3218	1	2876	7	14.8	1900	0	0
3221	2	2565	7	15	400	1	0
3222	1	2541	7	14.1	600	0	0
3227	1	2460	8	21.6	100	3	1
3227	1	2460	10	23.8	200	3	3
3227	1	2460	11	24	100	3	4
3228	2	2561	7	17.4	700	1	0
3229	1	2609	7	12	600	0	0
3230	2	2372	7	16.2	1300	0	0
3233	1	2537	9	20	1200	2	2
3233	1	2537	11	19	100	2	4
3234	2	2369	7	14	2100	0	0
3235	1	1105	7	15.9	1500	0	0
3236	2	2772	7	15	1200	0	0
3238	1	2363	7	13.8	400	0	0
3239	1	2837	7	12	200	0	0
3241	2	2569	7	15	1000	0	0
3242	2	2377	7	17.5	0	0	0
3244	1	2556	7	13.7	800	0	0
3245	2	1957	7	11.8	1600	0	0
3247	1	1459	7	11.8	1400	0	0
3248	1	234	12	24	0	8	5
3253	1	1455	7	13.6	200	0	0
3254	1	2099	7	13.8	800	0	0
3256	1	2576	7	11.8	200	0	0
3258	1	2436	7	14	0	0	0
3259	1	2621	7	12.7	700	0	0
3260	1	2559	7	15.6	1400	0	0
3261	2	2368	10	34.5	600	0	3
3262	1	2844	7	13.4	1400	0	0
3265	1	2523	7	12.5	2300	0	0
3271	2	2275	7	14.9	500	0	0
3272	1	2736	7	14.1	1200	0	0
3274	2	2573	7	16.8	600	1	0
3275	2	2542	7	11.6	1200	0	0
3276	1	2575	7	13.3	0	11	0
3276	1	2575	8	19	100	11	1
3276	1	2575	10	21	100	11	3
3276	1	2575	11	20.9	0	11	4
3276	1	2575	15	19.8	100	11	8
3276	1	2575	16	22.15	0	11	9
3277	1	1272	7	14.1	200	0	0
3278	2	2566	7	13.6	2000	1	0
3283	1	239	7	14.2	0	0	0
3284	2	1863	7	14.4	400	0	0
3285	1	2269	7	13.5	400	0	0
3287	2	1849	7	8.5	2400	0	0
3290	1	1425	7	13.5	1700	0	0
3294	2	2077	7	14.4	2700	0	0
3296	1	2273	7	9.3	1800	0	0
3297	1	2734	7	14	500	0	0
3300	1	2859	9	18.1	300	1	2
3301	1	2091	7	14	700	0	0
3302	2	3004	7	9.2	200	0	0
3305	1	2087	7	15	1400	0	0
3306	2	2085	7	11.2	1500	0	0
3307	2	2085	7	12.6	1100	0	0
3308	2	1860	7	15.6	1600	0	0
3311	1	1984	7	16.1	600	5	0
3311	1	1984	9	21.6	200	5	2
3311	1	1984	10	23.3	0	5	3
3311	1	1984	11	23.1	100	5	4
3311	1	1984	12	23.8	0	5	5
3313	2	2034	7	16	1000	0	0
3316	1	2577	8	20.3	300	1	1
3316	1	2577	9	21.9	0	1	2
3317	2	2858	7	11.5	1400	0	0
3321	1	1862	10	25.2	300	9	3
3321	1	1862	11	25.7	100	9	4
3321	1	1862	14	25.1	0	9	7
3322	2	2817	7	14	800	0	0
3323	1	2076	7	15.6	800	8	0
3323	1	2076	8	16.9	500	8	1
3323	1	2076	10	22.5	300	8	3
3323	1	2076	11	22.6	200	8	4
3323	1	2076	12	22.1	0	8	5
3324	2	2574	7	13.8	400	0	0
3326	1	2886	7	7.7	2500	0	0
3327	1	2492	7	12.7	600	0	0
3329	1	2771	8	19.1	200	7	1
3329	1	2771	10	23.5	0	7	3
3329	1	2771	12	24.3	0	7	5
3331	2	2567	7	15.3	1200	0	0
3332	1	2378	7	14.7	0	0	0
3333	2	2370	7	13	800	0	0
3334	1	1442	7	9.7	400	0	0
3335	1	1458	7	13.6	100	0	0
3398	1	2539	8	9.9	1200	7	0
3398	1	2539	9	11.4	700	7	1
3398	1	2539	10	15.6	200	7	2
3398	1	2539	14	19.6	0	7	6
3398	1	2539	15	18.2	100	7	7
3399	1	2564	8	11.2	300	2	0
3399	1	2564	9	16.7	100	2	1
3399	1	2564	10	19	400	2	2
3401	1	2376	9	17.4	0	12	1
3401	1	2376	12	27.9	0	12	4
3401	1	2376	15	23.4	200	12	7
3401	1	2376	16	23.35	200	12	8
3401	1	2376	17	20.8	200	12	9
3402	1	2523	8	14.4	300	10	0
3402	1	2523	9	18.5	300	10	1
3402	1	2523	10	21.4	0	10	2
3402	1	2523	12	23.8	0	10	4
3402	1	2523	13	25.2	0	10	5
3402	1	2523	14	25.7	0	10	6
3402	1	2523	16	27.8	0	10	8
3403	1	2579	8	15	200	12	0
3403	1	2579	11	20.9	200	12	3
3403	1	2579	12	22.7	100	12	4
3403	1	2579	13	24.2	0	12	5
3403	1	2579	14	22.6	100	12	6
3403	1	2579	16	25.25	0	12	8
3404	2	2643	9	18.4	0	0	1
3408	2	2445	8	13.5	200	0	0
3409	1	2827	9	17.4	200	13	1
3409	1	2827	13	24.6	100	13	5
3409	1	2827	15	24.2	0	13	7
3409	1	2827	17	25.2	0	13	9
3414	1	2679	8	14.9	200	12	0
3414	1	2679	9	18.4	0	12	1
3414	1	2679	11	20.6	200	12	3
3414	1	2679	12	22.8	0	12	4
3414	1	2679	15	24.4	200	12	7
3415	2	2563	8	13.8	500	0	0
3420	1	2266	8	12.2	200	0	0
3421	1	2367	10	23	100	7	2
3422	1	3007	8	12.6	200	10	0
3422	1	3007	9	19.9	300	10	1
3422	1	3007	10	23.4	0	10	2
3424	1	3029	8	9.8	500	6	0
3424	1	3029	9	14	1100	6	1
3424	1	3029	10	17.5	700	6	2
3424	1	3029	12	20.5	100	6	4
3424	1	3029	14	20.9	0	6	6
3425	2	2372	8	15.4	400	0	0
3425	2	2372	9	22.6	0	0	1
3426	1	2378	8	13.5	100	1	0
3426	1	2378	9	14.8	800	1	1
3427	2	2573	9	21.7	600	2	1
3427	2	2573	10	24.7	1100	2	2
3427	2	2573	11	29.7	500	2	3
3429	1	2418	8	12.8	300	0	0
3429	1	2418	9	16.7	200	0	1
3430	2	1941	8	18.2	300	3	0
3430	2	1941	9	26.4	400	3	1
3431	1	2660	8	12.6	400	0	0
3432	1	3108	8	10.9	600	6	0
3432	1	3108	12	20.7	0	6	4
3436	1	2601	11	17.9	100	11	3
3436	1	2601	12	20.8	0	11	4
3436	1	2601	17	18.2	0	11	9
3437	1	2460	9	18.4	100	12	1
3437	1	2460	12	23.8	0	12	4
3437	1	2460	15	25.6	0	12	7
3438	2	2561	8	15.5	1000	2	0
3438	2	2561	9	21.2	700	2	1
3439	1	2817	8	12.2	400	2	0
3439	1	2817	9	17.9	0	2	1
3439	1	2817	10	20	100	2	2
3439	1	2817	11	21.4	700	2	3
3440	2	2609	8	14.4	400	2	0
3440	2	2609	9	22	200	2	1
3441	1	2462	8	11.2	800	1	0
3442	1	2462	8	10.1	100	3	0
3443	1	2807	8	12.4	200	1	0
3445	1	2377	8	13.1	800	1	0
3447	2	2832	9	18	700	1	1
3448	1	2575	8	15.2	0	10	0
3448	1	2575	9	16.4	700	10	1
3448	1	2575	12	20.6	200	10	4
3448	1	2575	13	20.6	0	10	5
3448	1	2575	14	22.4	200	10	6
3449	1	2772	8	10.6	100	0	0
3450	1	2363	8	15	400	15	0
3450	1	2363	9	18.2	100	15	1
3450	1	2363	10	22.2	300	15	2
3450	1	2363	11	23.9	0	15	3
3450	1	2363	12	26.9	0	15	4
3450	1	2363	14	27.1	0	15	6
3450	1	2363	15	28.2	400	15	7
3450	1	2363	16	27.65	100	15	8
3450	1	2363	17	25.6	0	15	9
3450	1	2363	18	26.8	200	15	10
3451	2	2906	8	9.9	500	2	0
3451	2	2906	9	17.1	100	2	1
3452	2	2906	8	8.7	800	0	0
3452	2	2906	9	15.4	200	0	1
3452	2	2906	10	25.3	600	0	2
3452	2	2906	11	26.7	500	0	3
3453	2	1864	8	8.4	800	1	0
3453	2	1864	9	17	400	1	1
3453	2	1864	10	22.2	400	1	2
3453	2	1864	11	27.4	600	1	3
3455	1	2553	8	13.1	500	11	0
3455	1	2553	9	17.1	400	11	1
3455	1	2553	10	18	500	11	2
3455	1	2553	11	20.3	0	11	3
3455	1	2553	12	22.9	0	11	4
3455	1	2553	14	21.7	0	11	6
3455	1	2553	16	24.4	100	11	8
3455	1	2553	17	24.95	0	11	9
3455	1	2553	18	27	100	11	10
3455	1	2553	19	28.4	0	11	11
3455	1	2553	20	24.4	400	11	11
3455	1	2553	21	18.9	400	11	11
3456	2	2736	8	17.2	400	2	0
3456	2	2736	9	24.8	100	2	1
3458	1	2569	8	12.7	400	0	0
3460	1	2275	8	13.3	100	8	0
3460	1	2275	9	16.6	300	8	1
3460	1	2275	10	19.8	700	8	2
3460	1	2275	11	20.1	300	8	3
3460	1	2275	13	25.2	0	8	5
3460	1	2275	14	23.8	200	8	6
3462	2	2844	8	8.8	600	2	0
3465	1	2565	8	9.8	300	10	0
3465	1	2565	10	20.3	0	10	2
3465	1	2565	12	20.9	0	10	4
3465	1	2565	14	21.5	0	10	6
3465	1	2565	15	21.3	0	10	7
3465	1	2565	17	20.6	0	10	9
3467	2	2831	8	12	700	1	0
3467	2	2831	9	20.7	700	1	1
3467	2	2831	10	24	500	1	2
3468	1	2621	8	12.2	300	19	0
3468	1	2621	9	17.3	100	19	1
3468	1	2621	10	22.4	0	19	2
3468	1	2621	11	23	200	19	3
3468	1	2621	12	24.9	0	19	4
3468	1	2621	13	27.2	0	19	5
3468	1	2621	14	25.2	0	19	6
3468	1	2621	15	26.1	0	19	7
3468	1	2621	16	27.05	100	19	8
3468	1	2621	17	24.75	0	19	9
3468	1	2621	18	25.7	100	19	10
3468	1	2621	19	25.25	100	19	11
3469	1	2621	8	9.2	300	0	0
3470	2	2076	8	14.6	500	1	0
3470	2	2076	9	18.5	100	1	1
3470	2	2076	10	25.6	100	1	2
3470	2	2076	11	26.2	400	1	3
3472	1	1849	8	12.1	200	1	0
3472	1	1849	9	17.5	200	1	1
3473	1	2492	9	18.7	200	6	1
3473	1	2492	10	20.4	200	6	2
3473	1	2492	11	21.6	100	6	3
3473	1	2492	12	22.7	0	6	4
3473	1	2492	14	23.9	0	6	6
3473	1	2492	15	24.2	0	6	7
3474	1	2091	9	15.5	300	1	1
3475	1	2271	8	12.4	200	2	0
3475	1	2271	11	20.7	0	2	3
3475	1	2271	14	23.7	0	2	6
3475	1	2271	15	25.2	0	2	7
3475	1	2271	16	24.5	100	2	8
3475	1	2271	17	22.75	0	2	9
3476	1	2273	8	8.5	900	2	0
3476	1	2273	9	16	400	2	1
3476	1	2273	10	18.9	900	2	2
3476	1	2273	11	19.8	200	2	3
3477	2	2273	8	9.2	800	0	0
3477	2	2273	9	18	700	0	1
3478	2	2907	8	10.9	1200	0	0
3478	2	2907	9	19.3	700	0	1
3478	2	2907	10	25.6	600	0	2
3479	1	2542	9	17.8	800	6	1
3479	1	2542	12	24.3	0	6	4
3479	1	2542	13	27.2	0	6	5
3479	1	2542	15	24.7	800	6	7
3479	1	2542	16	24.7	0	6	8
3479	1	2542	17	22.6	100	6	9
3480	1	2577	8	15.3	100	4	0
3480	1	2577	9	18.1	600	4	1
3480	1	2577	10	22.5	100	4	2
3480	1	2577	11	24.9	300	4	3
3480	1	2577	12	27	0	4	4
3480	1	2577	13	29.7	0	4	5
3480	1	2577	14	30.6	100	4	6
3480	1	2577	16	28.4	200	4	8
3480	1	2577	17	27.5	500	4	9
3480	1	2577	18	26.05	300	4	10
3480	1	2577	19	25.7	0	4	11
3480	1	2577	20	23.7	1300	4	11
3481	2	3142	12	30.1	100	5	4
3481	2	3142	14	34.4	200	5	6
3482	1	2899	8	13.6	100	9	0
3482	1	2899	9	18.7	300	9	1
3482	1	2899	10	22	600	9	2
3482	1	2899	11	20.8	400	9	3
3482	1	2899	14	22.4	0	9	6
3482	1	2899	15	22.4	0	9	7
3483	2	2841	8	14.7	500	1	0
3483	2	2841	9	22.3	300	1	1
3484	2	2617	8	11.2	200	0	0
3485	2	2370	9	18.9	600	5	1
3485	2	2370	10	28.6	400	5	2
3485	2	2370	11	31.7	200	5	3
3485	2	2370	12	34.7	500	5	4
3485	2	2370	13	37.4	400	5	5
3485	2	2370	14	36.7	100	5	6
3485	2	2370	15	34.35	0	5	6
3486	2	2858	8	17.4	500	59	0
3486	2	2858	9	25.8	200	59	1
3486	2	2858	10	31.5	300	59	2
3486	2	2858	11	34.9	200	59	3
3486	2	2858	12	38.1	200	59	4
3486	2	2858	13	40.8	200	59	5
3486	2	2858	14	41.6	400	59	6
3486	2	2858	15	39.05	100	59	6
3486	2	2858	16	41.35	100	59	6
3486	2	2858	17	37.2	100	59	6
3487	2	2898	8	12.7	100	0	0
3487	2	2898	9	19.3	400	0	1
3487	2	2898	10	25.8	600	0	2
3487	2	2898	11	29.6	400	0	3
3488	1	2895	8	10.9	300	0	0
3489	1	3030	8	11.1	500	10	0
3489	1	3030	9	16.9	300	10	1
3489	1	3030	11	18.7	600	10	3
3489	1	3030	15	21.2	300	10	7
3490	2	3127	9	19.8	500	3	1
3490	2	3127	12	32.5	200	3	4
3491	1	2837	8	14.8	0	13	0
3491	1	2837	9	17.7	200	13	1
3491	1	2837	11	23.9	300	13	3
3491	1	2837	12	26.7	0	13	4
3491	1	2837	13	26.2	0	13	5
3491	1	2837	14	24.8	200	13	6
3491	1	2837	15	26.8	0	13	7
3491	1	2837	16	25.95	100	13	8
3491	1	2837	17	24.35	100	13	9
3492	2	2576	8	13.5	300	16	0
3492	2	2576	9	23.8	100	16	1
3492	2	2576	13	35.2	200	16	5
3493	1	2647	8	13.9	700	2	0
3493	1	2647	9	17.3	500	2	1
3494	2	1957	8	15.7	800	0	0
3495	2	2080	9	22.8	600	4	1
3495	2	2080	10	26.8	400	4	2
3496	2	2264	8	16.4	300	7	0
3496	2	2264	9	21.9	800	7	1
3496	2	2264	13	36.2	200	7	5
3497	1	2886	8	11.2	200	0	0
3498	1	2745	8	12.6	1300	1	0
3499	1	2034	8	13.9	200	1	0
3499	1	2034	9	15.3	100	1	1
3500	1	3131	8	9.4	700	7	0
3500	1	3131	9	15.1	100	7	1
3500	1	3131	10	19.4	0	7	2
3500	1	3131	11	19.6	0	7	3
3500	1	3131	12	21.6	0	7	4
3500	1	3131	13	22	200	7	5
3501	1	2478	9	18.1	200	6	1
3501	1	2478	10	21.8	100	6	2
3501	1	2478	13	24.2	0	6	5
3503	1	2558	9	17.4	600	8	1
3503	1	2558	10	19.8	100	8	2
3503	1	2558	11	19.6	200	8	3
3503	1	2558	12	21.3	100	8	4
3503	1	2558	13	23.4	0	8	5
3503	1	2558	14	23.4	200	8	6
3503	1	2558	15	22.2	100	8	7
3503	1	2558	16	22.6	300	8	8
3503	1	2558	17	20.75	400	8	9
3504	2	1451	8	11.6	400	0	0
3505	1	2876	8	8.6	800	1	0
3505	1	2876	9	15.3	100	1	1
3506	2	2876	8	9.2	1700	38	0
3506	2	2876	9	19.5	1000	38	1
3506	2	2876	10	26	600	38	2
3506	2	2876	11	29.3	400	38	3
3506	2	2876	12	33.4	200	38	4
3506	2	2876	13	35.2	100	38	5
3506	2	2876	14	36.4	100	38	6
3506	2	2876	16	37.5	200	38	6
3506	2	2876	17	35.05	1000	38	6
3507	1	2873	8	9.7	1000	7	0
3507	1	2873	9	15	500	7	1
3507	1	2873	10	17.7	0	7	2
3507	1	2873	11	19.2	0	7	3
3507	1	2873	12	21.5	0	7	4
3507	1	2873	13	23.6	0	7	5
3508	2	2369	10	21.2	1200	0	2
3509	1	2414	8	9.9	200	1	0
3509	1	2414	9	14.8	700	1	1
3511	2	3166	8	14.3	300	27	0
3512	2	3041	8	13.4	500	1	0
3513	2	3073	8	11.4	600	1	0
3514	1	2475	8	14.8	100	8	0
3514	1	2475	12	23.5	0	8	4
3515	1	3121	8	9.7	300	0	0
3516	1	1455	8	11.5	200	5	0
3516	1	1455	12	23.7	100	5	4
3516	1	1455	13	23.4	100	5	5
3517	2	2888	8	16.9	500	11	0
3517	2	2888	9	25	300	11	1
3517	2	2888	10	29.5	200	11	2
3517	2	2888	13	40.2	400	11	5
3518	2	2868	8	13.8	400	18	0
3518	2	2868	9	23.9	1000	18	1
3518	2	2868	10	32	700	18	2
3518	2	2868	13	38.7	500	18	5
3519	1	2276	9	18.3	100	15	1
3519	1	2276	16	25.05	0	15	8
3520	2	2771	8	16	500	9	0
3520	2	2771	11	36.4	300	9	3
3522	2	2734	9	17.7	1200	1	1
3523	2	2723	9	15.6	2000	0	1
3524	1	2343	9	13.5	800	10	1
3526	1	1279	9	18.4	500	10	1
3526	1	1279	10	21.4	900	10	2
3526	1	1279	11	21.8	600	10	3
3526	1	1279	13	25	0	10	5
3526	1	1279	14	23.6	600	10	6
3526	1	1279	15	24.4	300	10	7
3526	1	1279	17	22.25	300	10	9
3526	1	1279	18	23.6	400	10	10
3526	1	1279	19	22.45	300	10	11
3530	1	2812	9	19.5	100	8	1
3530	1	2812	12	25.1	0	8	4
3530	1	2812	14	22.5	0	8	6
3598	2	2370	9	15.3	100	0	0
3599	1	2541	9	10.9	700	0	0
3600	2	2541	9	10.2	0	0	0
3601	2	2376	9	19.3	0	0	0
3601	2	2376	10	23.4	300	0	1
3603	2	3053	9	13.5	300	0	0
3611	2	2643	9	16.2	200	0	0
3614	1	3276	10	16.8	300	4	1
3614	1	3276	11	18.6	100	4	2
3614	1	3276	12	20.4	0	4	3
3614	1	3276	14	18.4	100	4	5
3619	2	2460	9	17.3	200	1	0
3620	1	2460	9	15.3	600	11	0
3620	1	2460	12	22.7	0	11	3
3620	1	2460	16	25.4	0	11	7
3620	1	2460	17	24.75	0	11	8
3620	1	2460	18	24.25	100	11	9
3623	2	2575	9	18.6	200	0	0
3623	2	2575	11	31.8	300	0	2
3624	2	2563	9	19.3	1200	0	0
3625	1	3007	9	16.3	200	0	0
3626	2	2445	9	15.5	400	0	0
3628	1	3000	9	13.7	0	7	0
3628	1	3000	10	17.8	500	7	1
3628	1	3000	15	23	200	7	6
3628	1	3000	16	24	100	7	7
3629	2	3061	9	16.7	0	0	0
3630	2	2897	9	15	0	0	0
3631	1	3019	10	18.2	100	7	1
3631	1	3019	15	26.4	500	7	6
3631	1	3019	17	22.2	0	7	8
3631	1	3019	20	27.5	100	7	11
3634	2	3103	9	12.9	500	0	0
3638	1	2576	9	13.4	100	1	0
3639	2	3311	9	15.1	400	0	0
3639	2	3311	10	19.2	2100	0	1
3640	1	2346	12	24.8	100	7	3
3640	1	2346	13	24.6	100	7	4
3641	2	3288	9	16.7	300	0	0
3642	2	3248	10	20.4	200	16	1
3642	2	3248	13	39.7	100	16	4
3643	1	2367	12	23.4	100	11	3
3643	1	2367	14	25.3	100	11	5
3645	1	3437	9	11.4	100	8	0
3645	1	3437	12	22.4	0	8	3
3645	1	3437	15	22.6	100	8	6
3645	1	3437	17	21.9	0	8	8
3646	2	3060	10	16.8	1000	0	1
3648	2	3459	9	12	300	0	0
3654	2	2275	9	15.8	900	0	0
3655	2	2609	9	15	400	1	0
3657	2	3029	10	15.3	1200	0	1
3657	2	3029	11	20.5	200	0	2
3659	2	2378	9	13	400	0	0
3660	2	2363	9	10.4	500	0	0
3661	2	2363	9	12.2	600	0	0
3664	1	2888	9	13.9	1300	0	0
3665	1	3441	9	5.5	3400	0	0
3666	1	3042	9	11.1	1700	0	0
3667	1	3042	9	11.2	400	0	0
3668	1	3163	10	19.7	300	2	1
3668	1	3163	12	22.7	100	2	3
3668	1	3163	13	24	100	2	4
3669	1	2568	9	15.9	800	6	0
3669	1	2568	10	14.9	900	6	1
3669	1	2568	11	19.4	100	6	2
3669	1	2568	12	22.9	200	6	3
3669	1	2568	13	24.8	0	6	4
3670	1	2812	9	13.1	300	0	0
3671	1	3034	9	12.9	700	8	0
3671	1	3034	10	15.6	1800	8	1
3671	1	3034	11	21.5	700	8	2
3671	1	3034	12	24.6	100	8	3
3671	1	3034	13	23.2	200	8	4
3671	1	3034	14	22.4	0	8	5
3672	1	2907	9	13.6	500	0	0
3673	1	3131	9	12.3	300	6	0
3673	1	3131	11	18.6	200	6	2
3673	1	3131	12	21.4	100	6	3
3673	1	3131	14	20.7	0	6	5
3674	1	3460	9	10.4	500	0	0
3675	2	2736	9	17.8	700	1	0
3677	2	2831	9	15.4	200	0	0
3677	2	2831	10	16.6	400	0	1
3678	1	3030	9	14.1	200	4	0
3678	1	3030	10	17.6	600	4	1
3680	1	2271	9	14.7	700	0	0
3684	1	3164	9	14	300	0	0
3686	2	2372	9	14.9	1600	0	0
3687	1	3401	9	9.7	100	0	0
3688	1	3073	10	16	100	9	1
3688	1	3073	11	17.2	0	9	2
3688	1	3073	13	21.6	0	9	4
3688	1	3073	14	20.3	100	9	5
3690	1	2091	9	14.7	300	10	0
3690	1	2091	10	18.5	300	10	1
3690	1	2091	11	22.2	300	10	2
3690	1	2091	12	23.7	100	10	3
3690	1	2091	13	25.8	0	10	4
3690	1	2091	14	27.8	0	10	5
3690	1	2091	15	26.3	200	10	6
3690	1	2091	16	27.35	400	10	7
3690	1	2091	17	25.5	200	10	8
3690	1	2091	18	25.05	0	10	9
3690	1	2091	19	25.05	100	10	10
3693	2	2858	9	12.6	1100	0	0
3694	2	3323	9	7.7	1600	0	0
3695	1	3323	9	7.7	900	0	0
3698	2	2999	9	15.8	600	0	0
3699	2	2273	9	11	2200	0	0
3700	1	2273	9	11.9	1000	0	0
3701	2	2269	9	17.1	900	0	0
3702	2	2621	9	10.7	400	0	0
3703	2	2621	9	9.2	800	0	0
3704	2	3043	9	17.2	200	0	0
3706	1	3499	9	6.6	800	0	0
3707	2	1455	9	11.3	1200	0	0
3709	2	2579	9	17.6	1800	2	0
3709	2	2579	10	23.3	1200	2	1
3709	2	2579	11	33.5	600	2	2
3710	2	3092	9	17.3	400	0	0
3710	2	3092	10	19.6	1500	0	1
3711	1	3426	9	6.4	2700	0	0
3714	2	2841	10	16	800	2	1
3717	2	2895	9	14	900	0	0
3719	1	3498	9	8.9	400	0	0
3721	1	2566	9	15	300	0	0
3722	1	2414	9	14.4	800	1	0
3723	1	3409	9	9.7	400	0	0
3724	1	3445	10	14.3	300	0	1
3725	2	2771	9	16.1	0	0	0
3727	2	2898	9	14.2	900	0	0
3729	1	3493	9	11	400	0	0
3731	2	2866	10	23.5	900	2	1
3732	2	2553	9	15	500	0	0
3733	1	2276	9	18.2	600	12	0
3733	1	2276	10	20.8	400	12	1
3733	1	2276	16	29.4	50	12	7
3733	1	2276	19	25.55	0	12	10
3734	1	2987	9	15.3	400	0	0
3735	1	2565	9	8	100	0	0
3736	2	3491	9	8.6	2400	0	0
3738	1	2647	10	20.2	500	8	1
3738	1	2647	11	24.1	300	8	2
3738	1	2647	12	27	0	8	3
3738	1	2647	17	23.6	0	8	8
3740	1	2817	9	9.9	700	0	0
[truncated: 2,935 more rows]
