# Supplementary material for: Natural Selection on Individual Variation in Tolerance of Gastrointestinal Nematode Infection
Source: PLoS Biol. 2014 Jul 29;12(7):e1001917. doi: 10.1371/journal.pbio.1001917 (PMC4114752; doi:10.1371/journal.pbio.1001917)
Supplement: Table S6 — Model estimates for univariate random regression models used to plot Figure 2B and 2C. Each row represents an individual sheep and gives the intercept of body weight (i.e., predicted body weight at FEC = 0); the individually estimated slope of body weight on FEC; estimated body weight at FEC = 2,000, based on the individual intercept and slope; the predicted change in body weight between FEC = 0 and FEC = 2,000; and the binned groups of intercept and weight change used for plotting the histograms of Figure 2B and 2C. (XLSX) [file pbio.1001917.s007.xlsx]

## Sheet: Table S6
ID	Individual intercept (FEC = 0)	Individual WT~FEC slope	Estimated weight at FEC = 2000	Change in weight from FEC = 0 to FEC = 2000	Intercept group	Change group
577	23.997	-0.711728	21.7254	-2.27165	24	-2.4
904	20.491	-0.6136	18.5326	-1.95845	21	-2
1077	24.309	-0.892	21.462	-2.84703	25	-3
1089	19.478	-0.77889	16.992	-2.48601	20	-2.6
1098	21.9976	-0.727999	19.674	-2.32358	22	-2.4
1223	18.818	-0.8619	16.067	-2.75096	19	-2.8
1242	22.641	-0.8481	19.9341	-2.70691	23	-2.8
1244	21.12	-0.73235	18.7825	-2.33747	22	-2.4
1246	23.936	-0.5579	22.1553	-1.78067	24	-1.8
1255	22.0418	-0.75358	19.6366	-2.40523	23	-2.6
1263	21.1049	-0.8421	18.4171	-2.68776	22	-2.8
1554	22.5576	-0.8473	19.8532	-2.70436	23	-2.8
1592	20.984	-0.72955	18.6555	-2.32853	21	-2.4
1597	20.7854	-0.66277	18.67	-2.11539	21	-2.2
1598	17.434	-0.4358	16.043	-1.39096	18	-1.4
1604	22.815	-0.714725	20.5338	-2.28121	23	-2.4
1605	18.699	-0.5214	17.0348	-1.66417	19	-1.8
1614	23.638	-0.68678	21.446	-2.19202	24	-2.2
1615	19.392	-0.62066	17.411	-1.98098	20	-2
1621	21.1256	-0.69741	18.8997	-2.22595	22	-2.4
1625	21.0108	-0.67803	18.8467	-2.16409	22	-2.2
1629	20.7824	-0.66256	18.6677	-2.11472	21	-2.2
1632	20.159	-0.70709	17.9022	-2.25684	21	-2.4
1639	19.659	-0.5865	17.787	-1.87195	20	-2
1642	19.341	-0.70027	17.1059	-2.23508	20	-2.4
1645	16.828	-0.3947	15.5682	-1.25978	18	-1.4
1648	17.869	-0.5977	15.9613	-1.9077	18	-2
1649	21.3371	-0.720652	19.037	-2.30013	22	-2.4
1660	23.831	-0.8409	21.1471	-2.68393	24	-2.8
1663	24.466	-0.8421	21.7782	-2.68776	25	-2.8
1664	22.2628	-0.384	21.0372	-1.22563	23	-1.4
1666	20.435	-0.3945	19.1759	-1.25914	21	-1.4
1735	19.218	-0.5229	17.549	-1.66896	20	-1.8
1738	22.1135	-0.71469	19.8324	-2.2811	23	-2.4
1739	24.106	-0.76231	21.6729	-2.43309	25	-2.6
1741	21.9831	-0.721691	19.6797	-2.30345	22	-2.4
1744	21.4028	-0.709864	19.1371	-2.2657	22	-2.4
1745	24.993	-0.64224	22.9431	-2.04986	25	-2.2
1746	19.836	-0.8287	17.191	-2.64499	20	-2.8
1747	20.353	-0.6156	18.3882	-1.96483	21	-2
1750	21.4371	-0.70434	19.189	-2.24807	22	-2.4
1751	23.095	-0.74482	20.7177	-2.37727	24	-2.4
1755	28.136	-0.74563	25.7561	-2.37985	28	-2.4
1756	20.666	-0.64128	18.6192	-2.0468	21	-2.2
1757	21.1233	-0.6675	18.9928	-2.13048	22	-2.2
1760	24.205	-0.8316	21.5508	-2.65425	25	-2.8
1761	20.6463	-0.74155	18.2795	-2.36683	21	-2.4
1768	23.487	-0.77613	21.0098	-2.4772	24	-2.6
1774	22.4702	-0.78884	19.9524	-2.51777	23	-2.6
1775	23.682	-0.8879	20.8481	-2.83394	24	-3
1776	24.276	-0.80013	21.7222	-2.5538	25	-2.6
1779	20.425	-0.63668	18.3929	-2.03211	21	-2.2
1782	20.7046	-0.64443	18.6478	-2.05685	21	-2.2
1784	21.4082	-0.77156	18.9456	-2.46262	22	-2.6
1791	19.999	-0.5867	18.1264	-1.87259	20	-2
1803	17.179	-1.0138	13.9432	-3.23578	18	-3.4
1816	23.131	-0.70519	20.8802	-2.25078	24	-2.4
1817	24.85	-0.81761	22.2404	-2.60959	25	-2.8
1819	23.704	-0.80985	21.1192	-2.58483	24	-2.6
1820	25.812	-0.868	23.0416	-2.77043	26	-2.8
1825	23.602	-0.928	20.6401	-2.96193	24	-3
1833	22.03	-0.75283	19.6272	-2.40283	23	-2.6
1834	20.8706	-0.6366	18.8387	-2.03186	21	-2.2
1835	21.6006	-0.81693	18.9932	-2.60742	22	-2.8
1846	25.598	-1.0446	22.2639	-3.33409	26	-3.4
1855	24.802	-0.9796	21.6754	-3.12662	25	-3.2
1876	22.3994	-1.0724	18.9766	-3.42282	23	-3.6
1877	22.448	-0.74402	20.0733	-2.37471	23	-2.4
1880	22.0662	-0.8455	19.3676	-2.69861	23	-2.8
1882	20.324	-0.66022	18.2168	-2.10725	21	-2.2
1883	16.324	-0.3605	15.1734	-1.15062	18	-1.2
1884	24.146	-0.70142	21.9073	-2.23875	25	-2.4
1885	23.576	-0.8425	20.887	-2.68904	24	-2.8
1887	21.3432	-0.5514	19.5833	-1.75992	22	-1.8
1890	18.659	-0.2063	18.0005	-0.658455	19	-0.8
1891	23.474	-0.8305	20.8233	-2.65074	24	-2.8
1908	23.608	-0.9153	20.6866	-2.9214	24	-3
1913	20.073	-0.65364	17.9868	-2.08625	21	-2.2
1915	23.564	-0.8295	20.9165	-2.64754	24	-2.8
1916	20.089	-0.5896	18.2072	-1.88185	21	-2
1919	23.197	-0.831	20.5447	-2.65233	24	-2.8
1928	19.671	-0.5541	17.9025	-1.76854	20	-1.8
1929	20.6945	-0.68002	18.5241	-2.17044	21	-2.2
1932	19.194	-0.8685	16.422	-2.77202	20	-2.8
1934	20.7256	-0.80213	18.1654	-2.56019	21	-2.6
1941	21.6679	-0.722688	19.3612	-2.30663	22	-2.4
1952	21.2717	-0.68496	19.0855	-2.18621	22	-2.2
1963	23.692	-0.866	20.928	-2.76404	24	-2.8
1966	20.7633	-0.63483	18.7371	-2.02621	21	-2.2
1968	21.4357	-0.70625	19.1815	-2.25416	22	-2.4
1969	21.2818	-0.73492	18.9361	-2.34567	22	-2.4
1972	24.655	-0.9766	21.538	-3.11705	25	-3.2
1973	21.8563	-0.725926	19.5393	-2.31696	22	-2.4
1974	22.742	-0.66746	20.6116	-2.13036	23	-2.2
1976	18.075	-0.5689	16.2592	-1.81578	19	-2
1981	20.093	-0.64971	18.0193	-2.0737	21	-2.2
1982	19.14	-0.64975	17.0662	-2.07383	20	-2.2
1984	20.7452	-0.720342	18.4461	-2.29914	21	-2.4
1989	22.691	-0.8249	20.0581	-2.63286	23	-2.8
1990	20.8425	-0.73177	18.5069	-2.33562	21	-2.4
1991	21.7024	-0.721612	19.3992	-2.30319	22	-2.4
1996	22.461	-0.75499	20.0513	-2.40973	23	-2.6
2001	23.746	-0.8995	20.875	-2.87097	24	-3
2002	23.442	-0.8226	20.8165	-2.62552	24	-2.8
2007	25.08	-0.81634	22.4745	-2.60554	26	-2.8
2016	23.723	-0.716795	21.4352	-2.28782	24	-2.4
2019	22.982	-0.73768	20.6275	-2.35448	23	-2.4
2020	20.9474	-0.66229	18.8335	-2.11385	21	-2.2
2028	22.753	-0.78351	20.2522	-2.50076	23	-2.6
2032	20.114	-0.69897	17.8831	-2.23093	21	-2.4
2040	23.275	-0.76572	20.831	-2.44398	24	-2.6
2041	18.228	-0.62417	16.2358	-1.99219	19	-2
2042	22.3915	-0.77392	19.9214	-2.47015	23	-2.6
2054	20.881	-0.75343	18.4763	-2.40475	21	-2.6
2056	20.03	-0.65181	17.9496	-2.0804	21	-2.2
2064	21.8475	-0.5811	19.9928	-1.85472	22	-2
2066	21.5228	-0.63309	19.5021	-2.02066	22	-2.2
2067	21.3837	-0.9199	18.4476	-2.93608	22	-3
2068	25.372	-0.7404	23.0088	-2.36316	26	-2.4
2069	23.415	-0.62592	21.4172	-1.99777	24	-2
2070	23.614	-0.78087	21.1217	-2.49233	24	-2.6
2071	21.7204	-0.8391	19.0422	-2.67818	22	-2.8
2072	21.6052	-0.66939	19.4686	-2.13652	22	-2.2
2073	21.9079	-0.9057	19.0171	-2.89075	22	-3
2074	23.725	-0.77833	21.2408	-2.48422	24	-2.6
2075	21.4789	-0.74931	19.0873	-2.3916	22	-2.4
2096	24.425	0.8237	27.054	2.62903	25	-0.8
2099	22.822	-1.3713	18.4452	-4.37683	23	-4.2
2105	19.594	-0.5792	17.7453	-1.84865	20	-2
2108	23.237	-0.8338	20.5757	-2.66127	24	-2.8
2110	18.913	-0.488	17.3554	-1.55757	19	-1.6
2115	21.5639	-0.5828	19.7037	-1.86014	22	-2
2120	21.8169	-0.73291	19.4776	-2.33925	22	-2.4
2121	21.9135	-0.74331	19.5411	-2.37245	22	-2.4
2123	26.226	-1.096	22.7279	-3.49814	27	-3.6
2126	22.1404	-0.6153	20.1765	-1.96387	23	-2
2133	18.542	-0.74805	16.1544	-2.38758	19	-2.4
2135	23.23	-0.78089	20.7376	-2.49239	24	-2.6
2141	19.566	-0.2725	18.6963	-0.869748	20	-1
2143	18.638	-0.5529	16.8733	-1.76471	19	-1.8
2146	22.4182	-0.75568	20.0063	-2.41193	23	-2.6
2149	25.959	-0.712468	23.685	-2.27401	26	-2.4
2154	21.1172	-0.711317	18.8469	-2.27034	22	-2.4
2159	23.474	-0.8516	20.7559	-2.71808	24	-2.8
2162	21.7621	-0.173	21.2099	-0.55217	22	-0.8
2163	20.9414	-0.76148	18.511	-2.43044	21	-2.6
2164	20.259	-0.723449	17.9499	-2.30906	21	-2.4
2165	20.258	-0.66152	18.1466	-2.1114	21	-2.2
2167	19.618	-0.4731	18.108	-1.51001	20	-1.6
2168	20.7839	-0.711331	18.5135	-2.27038	21	-2.4
2169	20.361	-0.62261	18.3738	-1.98721	21	-2
2170	22.5503	-0.81325	19.9546	-2.59568	23	-2.6
2171	23.966	-0.8668	21.1994	-2.7666	24	-2.8
2172	22.367	-0.62168	20.3828	-1.98424	23	-2
2173	24.402	-0.64495	22.3435	-2.05851	25	-2.2
2174	23.386	-1.3073	19.2134	-4.17256	24	-4.2
2175	20.6849	-0.79969	18.1325	-2.5524	21	-2.6
2176	22.742	-0.79747	20.1967	-2.54531	23	-2.6
2177	20.7708	-0.6122	18.8168	-1.95398	21	-2
2178	23.718	-0.8221	21.0941	-2.62393	24	-2.8
2179	22.878	-0.8222	20.2538	-2.62424	23	-2.8
2180	19.813	-0.81616	17.208	-2.60497	20	-2.8
2181	19.68	-0.619	17.7043	-1.97568	20	-2
2214	20.6365	-0.8329	17.9781	-2.6584	21	-2.8
2218	20.527	-0.6792	18.3592	-2.16783	21	-2.2
2219	23.672	-0.8382	20.9967	-2.67531	24	-2.8
2232	22.125	-0.70776	19.866	-2.25898	23	-2.4
2236	22.2028	-0.66222	20.0892	-2.11363	23	-2.2
2238	16.536	-0.3035	15.5673	-0.968692	18	-1
2239	27.291	-0.6793	25.1229	-2.16815	28	-2.2
2243	20.439	-0.65278	18.3555	-2.0835	21	-2.2
2245	21.3698	-0.4177	20.0366	-1.33319	22	-1.4
2248	24.365	-0.78682	21.8537	-2.51132	25	-2.6
2250	22.0332	-0.74855	19.644	-2.38917	23	-2.4
2252	20.731	-0.4821	19.1923	-1.53874	21	-1.6
2254	23.27	-0.78933	20.7507	-2.51933	24	-2.6
2255	23.708	-0.8962	20.8476	-2.86043	24	-3
2256	22.1031	-0.74652	19.7204	-2.38269	23	-2.4
2259	23.236	-0.78786	20.7214	-2.51464	24	-2.6
2260	21.8512	-0.715107	19.5688	-2.28243	22	-2.4
2262	21.3075	-0.6045	19.3781	-1.9294	22	-2
2263	21.9218	-0.727996	19.5982	-2.32357	22	-2.4
2265	22.865	-0.63563	20.8362	-2.02876	23	-2.2
2266	14.888	-0.34	13.8028	-1.08519	18	-1.2
2269	21.6561	-0.71143	19.3854	-2.2707	22	-2.4
2270	24.09	-0.8534	21.3662	-2.72383	25	-2.8
2271	22.817	-0.8239	20.1873	-2.62967	23	-2.8
2273	18.939	-0.5682	17.1255	-1.81354	19	-2
2274	22.76	-0.7049	20.5101	-2.24985	23	-2.4
2275	22	-0.724687	19.687	-2.31301	22	-2.4
2276	21.2216	-0.67273	19.0744	-2.14718	22	-2.2
2277	18.011	-0.70472	15.7617	-2.24928	19	-2.4
2278	20.543	-0.67084	18.4019	-2.14114	21	-2.2
2279	23.288	-0.67908	21.1206	-2.16744	24	-2.2
2280	22.3956	-0.2965	21.4493	-0.946349	23	-1
2281	23.329	-0.74238	20.9595	-2.36948	24	-2.4
2282	23.173	-0.81193	20.5815	-2.59147	24	-2.6
2285	19.273	-0.64331	17.2197	-2.05328	20	-2.2
2287	21.8164	-0.8722	19.0326	-2.78383	22	-2.8
2290	17.714	-0.6004	15.7977	-1.91632	18	-2
2291	21.1081	-0.68392	18.9252	-2.18289	22	-2.2
2292	21.1511	-0.74873	18.7614	-2.38975	22	-2.4
2293	20.264	-0.6043	18.3352	-1.92877	21	-2
2294	23.139	-0.5877	21.2632	-1.87578	24	-2
2295	21.4049	-0.70443	19.1565	-2.24835	22	-2.4
2296	19.806	-0.9315	16.8329	-2.9731	20	-3
2297	22.1472	-1.0985	18.6411	-3.50612	23	-3.6
2300	22.89	-0.75332	20.4856	-2.4044	23	-2.6
2301	22.746	-0.4037	21.4575	-1.2885	23	-1.4
2302	23.175	-0.80523	20.6049	-2.57008	24	-2.6
2303	27.951	-0.9246	24.9999	-2.95108	28	-3
2305	24.239	-0.9413	21.2346	-3.00438	25	-3.2
2306	22.939	-0.75944	20.5151	-2.42393	23	-2.6
2308	20.7634	-0.70774	18.5045	-2.25892	21	-2.4
2310	20.484	-0.65488	18.3938	-2.0902	21	-2.2
2311	22.2458	-0.68254	20.0673	-2.17849	23	-2.2
2314	22.2445	-0.74522	19.866	-2.37854	23	-2.4
2315	21.5229	-0.711071	19.2534	-2.26955	22	-2.4
2323	24.431	-0.9755	21.3175	-3.11354	25	-3.2
2327	21.2734	-0.65079	19.1963	-2.07715	22	-2.2
2339	21.9328	-0.8592	19.1905	-2.74234	22	-2.8
2340	23.332	-0.6077	21.3924	-1.93962	24	-2
2341	22.2651	-0.3506	21.1461	-1.11902	23	-1.2
2342	22.1266	-0.76482	19.6855	-2.4411	23	-2.6
2343	22.3141	-0.8514	19.5967	-2.71744	23	-2.8
2344	27.707	-0.73521	25.3604	-2.3466	28	-2.4
2349	23.11	-0.78186	20.6145	-2.49549	24	-2.6
2350	22.2202	-0.9114	19.3113	-2.90895	23	-3
2351	18.23	-0.63509	16.203	-2.02704	19	-2.2
2352	22.4851	-0.8532	19.7619	-2.72319	23	-2.8
2353	22.2203	-0.8807	19.4093	-2.81096	23	-3
2354	22.4519	-0.69469	20.2346	-2.21727	23	-2.4
2355	21.4799	-0.5804	19.6274	-1.85248	22	-2
2356	24.1	-0.76888	21.6459	-2.45406	25	-2.6
2358	21.0796	-0.8319	18.4244	-2.6552	22	-2.8
2359	24.865	-0.9948	21.6899	-3.17514	25	-3.2
2360	22.3553	-0.5754	20.5188	-1.83652	23	-2
2361	22.185	-0.8205	19.5662	-2.61882	23	-2.8
2362	23.08	-0.831	20.4277	-2.65233	24	-2.8
2363	21.6658	-0.722002	19.3613	-2.30444	22	-2.4
2364	24.076	-0.76294	21.6409	-2.4351	25	-2.6
2365	20.41	-0.5348	18.7031	-1.70694	21	-1.8
2366	21.9659	-0.69188	19.7576	-2.2083	22	-2.4
2368	21.7225	-0.4026	20.4375	-1.28499	22	-1.4
2369	21.6998	-0.78066	19.2081	-2.49166	22	-2.6
2370	18.662	-0.63431	16.6375	-2.02455	19	-2.2
2371	20.7972	-1.091	17.315	-3.48218	21	-3.6
2372	23.33	-0.8782	20.527	-2.80298	24	-3
2373	23.043	-0.9374	20.0511	-2.99193	24	-3
2374	22.1086	-0.5339	20.4045	-1.70407	23	-1.8
2375	21.0764	-0.8226	18.4509	-2.62552	22	-2.8
2376	21.7265	-0.5252	20.0502	-1.6763	22	-1.8
2378	23.646	-0.8235	21.0176	-2.62839	24	-2.8
2379	21.9117	-0.8483	19.2042	-2.70755	22	-2.8
2390	20.588	-0.9834	17.4492	-3.13875	21	-3.2
2393	21.9602	-0.66659	19.8326	-2.12758	22	-2.2
2397	21.8664	-0.74359	19.4931	-2.37334	22	-2.4
2401	21.608	-0.68067	19.4355	-2.17252	22	-2.2
2406	21.7687	-0.7008	19.5319	-2.23677	22	-2.4
2408	19.027	-0.4995	17.4327	-1.59427	20	-1.6
2409	21.7056	-0.9268	18.7475	-2.9581	22	-3
2414	20.489	-0.68062	18.3166	-2.17236	21	-2.2
2417	22.2567	-0.9113	19.3481	-2.90863	23	-3
2420	20.9156	-0.66943	18.779	-2.13664	21	-2.2
2421	20.085	-0.5483	18.335	-1.75003	21	-1.8
2422	21.6869	-0.722141	19.3821	-2.30488	22	-2.4
2424	20.487	-0.68752	18.2926	-2.19438	21	-2.2
2431	20.7801	-0.75702	18.3639	-2.41621	21	-2.6
2432	20.9923	-0.63489	18.9659	-2.0264	21	-2.2
2434	19.47	-0.69028	17.2668	-2.20319	20	-2.4
2435	23.148	-0.78414	20.6452	-2.50277	24	-2.6
2436	21.063	-0.71178	18.7912	-2.27181	22	-2.4
2437	19.959	-0.6017	18.0385	-1.92047	20	-2
2440	20.191	-0.5982	18.2817	-1.9093	21	-2
2441	21.0693	-0.67262	18.9225	-2.14682	22	-2.2
2442	20.9889	-0.67462	18.8357	-2.15321	21	-2.2
2444	22.2938	-0.722023	19.9893	-2.30451	23	-2.4
2447	23.175	-0.69903	20.9439	-2.23112	24	-2.4
2448	21.8421	-0.728726	19.5162	-2.3259	22	-2.4
2450	21.403	-0.69791	19.1755	-2.22754	22	-2.4
2451	21.2405	-0.68713	19.0474	-2.19314	22	-2.2
2452	20.983	-0.73907	18.6241	-2.35892	21	-2.4
2456	22.668	-0.62224	20.682	-1.98603	23	-2
2457	21.3978	-0.7067	19.1422	-2.2556	22	-2.4
2459	23.314	-0.80871	20.7328	-2.58119	24	-2.6
2460	21.4643	-0.720443	19.1648	-2.29946	22	-2.4
2461	20.9985	-0.70187	18.7583	-2.24018	21	-2.4
2462	21.9155	-0.73932	19.5558	-2.35971	22	-2.4
2465	22.1892	-0.717121	19.9003	-2.28886	23	-2.4
2466	20.8589	-0.65479	18.769	-2.08992	21	-2.2
2467	21.3188	-0.69798	19.091	-2.22777	22	-2.4
2468	21.6418	-0.72145	19.3391	-2.30268	22	-2.4
2469	21.609	-0.719476	19.3126	-2.29638	22	-2.4
2471	20.8469	-0.65377	18.7602	-2.08666	21	-2.2
2472	22.0369	-0.73099	19.7038	-2.33313	23	-2.4
2473	21.6991	-0.721519	19.3962	-2.3029	22	-2.4
2475	24.396	-0.8228	21.7698	-2.62616	25	-2.8
2476	20.9906	-0.69956	18.7578	-2.23281	21	-2.4
2479	22.1431	-0.71571	19.8587	-2.28436	23	-2.4
2480	21.9945	-0.74581	19.6141	-2.38043	22	-2.4
2481	20.291	-0.62523	18.2954	-1.99557	21	-2
2483	20.568	-0.67464	18.4147	-2.15327	21	-2.2
2484	21.6582	-0.721464	19.3554	-2.30272	22	-2.4
2487	21.2766	-0.80338	18.7124	-2.56418	22	-2.6
2488	19.032	-0.64239	16.9817	-2.05034	20	-2.2
2489	20.6387	-0.62255	18.6517	-1.98701	21	-2
2490	20.596	-0.73573	18.2477	-2.34826	21	-2.4
2494	23.282	-0.9396	20.283	-2.99895	24	-3
2495	19.334	-0.4939	17.7576	-1.5764	20	-1.6
2496	21.4273	-0.716699	19.1398	-2.28751	22	-2.4
2497	21.1353	-0.81141	18.5455	-2.58981	22	-2.6
2498	23.554	-0.8289	20.9084	-2.64563	24	-2.8
2502	19.373	-0.68896	17.174	-2.19898	20	-2.2
2504	22.643	-0.79175	20.1159	-2.52706	23	-2.6
2505	20.7512	-0.6412	18.7047	-2.04654	21	-2.2
2508	21.964	-0.74846	19.5751	-2.38889	22	-2.4
2509	21.9481	-0.74569	19.5681	-2.38004	22	-2.4
2510	20.8278	-0.68568	18.6393	-2.18851	21	-2.2
2516	22.2659	-0.77405	19.7953	-2.47056	23	-2.6
2517	21.3936	-0.69901	19.1625	-2.23105	22	-2.4
2519	23.983	-0.78557	21.4757	-2.50733	24	-2.6
2520	22.3539	-0.65482	20.2639	-2.09001	23	-2.2
2521	21.312	-0.70623	19.0579	-2.2541	22	-2.4
2523	20.203	-0.80015	17.6491	-2.55387	21	-2.6
2525	21.2414	-0.69784	19.0141	-2.22732	22	-2.4
2526	20.358	-0.64775	18.2906	-2.06745	21	-2.2
2527	19.425	-0.5639	17.6252	-1.79982	20	-1.8
2528	22.4204	-0.78715	19.908	-2.51237	23	-2.6
2530	17.07	-0.3972	15.8022	-1.26776	18	-1.4
2532	20.603	-0.720902	18.3021	-2.30093	21	-2.4
2534	21.6632	-1.0712	18.2442	-3.41899	22	-3.6
2536	21.9491	-0.76925	19.4939	-2.45524	22	-2.6
2537	23.113	-0.825	20.4798	-2.63318	24	-2.8
2539	22.2128	-0.64556	20.1523	-2.06046	23	-2.2
2540	22.822	-0.62606	20.8238	-1.99822	23	-2
2541	21.7152	-0.721968	19.4108	-2.30433	22	-2.4
2542	19.779	-0.6149	17.8164	-1.9626	20	-2
2543	20.7973	-0.67266	18.6503	-2.14695	21	-2.2
2544	22.5529	-0.79838	20.0047	-2.54822	23	-2.6
2545	21.173	-0.75279	18.7703	-2.40271	22	-2.6
2547	21.1261	-0.69834	18.8972	-2.22892	22	-2.4
2548	20.401	-0.66756	18.2703	-2.13067	21	-2.2
2549	21.6082	-0.67739	19.4462	-2.16205	22	-2.2
2550	20.146	-0.721027	17.8447	-2.30133	21	-2.4
2556	21.1121	-0.68334	18.9311	-2.18104	22	-2.2
2569	24.166	-0.9082	21.2673	-2.89873	25	-3
2571	22.1243	-0.8427	19.4346	-2.68968	23	-2.8
2572	22.5618	-0.9007	19.687	-2.8748	23	-3
2596	20.515	-0.64104	18.469	-2.04603	21	-2.2
2600	22.082	-0.567	20.2723	-1.80971	23	-2
2601	16.552	-0.516	14.9051	-1.64694	18	-1.8
2602	21.9005	-0.74695	19.5164	-2.38407	22	-2.4
2605	20.7962	-0.66567	18.6716	-2.12464	21	-2.2
2606	21.9696	-0.71011	19.7031	-2.26648	22	-2.4
2607	20.7215	-0.65776	18.6221	-2.0994	21	-2.2
2608	18.981	-0.5357	17.2712	-1.70981	19	-1.8
2610	18.54	-0.6063	16.6049	-1.93515	19	-2
2611	23.571	-0.8235	20.9426	-2.62839	24	-2.8
2612	20.9227	-0.70609	18.669	-2.25365	21	-2.4
2613	20.549	-0.720576	18.2491	-2.29989	21	-2.4
2614	22.4204	-0.78004	19.9307	-2.48968	23	-2.6
2616	22.4806	-0.79225	19.9519	-2.52865	23	-2.6
2617	21.5134	-0.5795	19.6638	-1.84961	22	-2
2618	23.124	-0.1668	22.5916	-0.532381	24	-0.8
2619	21.7542	-0.721621	19.451	-2.30322	22	-2.4
2620	22.1388	-0.74862	19.7494	-2.3894	23	-2.4
2621	18.644	-0.5754	16.8075	-1.83652	19	-2
2623	19.998	-0.5485	18.2473	-1.75067	20	-1.8
2624	19.48	-0.6741	17.3285	-2.15155	20	-2.2
2627	24.107	-0.829	21.4611	-2.64595	25	-2.8
2629	19.724	-0.5586	17.9411	-1.7829	20	-1.8
2631	19.464	-0.66635	17.3372	-2.12681	20	-2.2
2632	22.0959	-0.73252	19.7579	-2.33801	23	-2.4
2633	21.9117	-0.67354	19.7619	-2.14976	22	-2.2
2634	22.691	-0.79514	20.1531	-2.53788	23	-2.6
2635	20.513	-0.721302	18.2108	-2.3022	21	-2.4
2637	20.143	-0.65327	18.0579	-2.08506	21	-2.2
2638	21.6296	-0.720114	19.3312	-2.29841	22	-2.4
2640	21.6908	-0.64263	19.6397	-2.0511	22	-2.2
2641	20.7938	-0.6633	18.6767	-2.11708	21	-2.2
2642	22.4842	-0.71827	20.1917	-2.29253	23	-2.4
2643	23.147	-0.8699	20.3705	-2.77649	24	-2.8
2644	22.2914	-0.79807	19.7442	-2.54723	23	-2.6
2645	19.836	-0.74558	17.4563	-2.37969	20	-2.4
2648	19.158	-0.6119	17.205	-1.95302	20	-2
2649	20.8058	-0.74387	18.4316	-2.37424	21	-2.4
2650	23.881	-0.76674	21.4338	-2.44723	24	-2.6
2651	20.9536	-0.69485	18.7358	-2.21778	21	-2.4
2653	22.703	-0.76865	20.2497	-2.45333	23	-2.6
2654	22.1423	-0.75628	19.7285	-2.41385	23	-2.6
2655	22.0813	-0.711904	19.8091	-2.27221	23	-2.4
2658	22.5384	-1.0182	19.2886	-3.24982	23	-3.4
2659	22.074	-0.69665	19.8505	-2.22352	23	-2.4
2660	22.2177	-0.76996	19.7602	-2.45751	23	-2.6
2661	19.921	-0.8481	17.2141	-2.70691	20	-2.8
2662	24.256	-0.66672	22.128	-2.12799	25	-2.2
2663	20.199	-0.499	18.6063	-1.59268	21	-1.6
2664	18.913	-0.5659	17.1068	-1.8062	19	-2
2666	24.36	-0.8567	21.6256	-2.73436	25	-2.8
2667	21.9846	-0.718866	19.6902	-2.29443	22	-2.4
2668	21.0091	-0.65165	18.9292	-2.07989	22	-2.2
2669	19.055	-0.5707	17.2335	-1.82152	20	-2
2670	21.1179	-0.78175	18.6228	-2.49514	22	-2.6
2671	21.3474	-0.5852	19.4796	-1.8678	22	-2
2672	21.8417	-0.61945	19.8646	-1.97712	22	-2
2673	22.1074	-0.5802	20.2556	-1.85184	23	-2
2674	20.135	-0.6018	18.2142	-1.92079	21	-2
2675	19.233	-1.3522	14.9171	-4.31586	20	-4.2
2676	22.3777	-0.8016	19.8192	-2.55849	23	-2.6
2677	20.083	-0.75869	17.6615	-2.42154	21	-2.6
2678	20.462	-0.67017	18.323	-2.13901	21	-2.2
2679	19.954	-0.6013	18.0348	-1.91919	20	-2
2680	20.389	-0.727509	18.067	-2.32202	21	-2.4
2682	18.272	-0.113	17.9113	-0.360666	19	-0.8
2683	23.549	-0.68125	21.3746	-2.17437	24	-2.2
2685	23.087	-0.8437	20.3941	-2.69287	24	-2.8
2686	20.8894	-0.65162	18.8096	-2.0798	21	-2.2
2688	21.6239	-0.78823	19.1081	-2.51582	22	-2.6
2695	19.468	-0.68368	17.2859	-2.18213	20	-2.2
2696	16.92	-0.62394	14.9285	-1.99145	18	-2
2697	20.566	-0.62806	18.5614	-2.0046	21	-2.2
2698	21.422	-0.76064	18.9942	-2.42776	22	-2.6
2699	20.203	-0.72683	17.8832	-2.31985	21	-2.4
2700	18.989	-0.712652	16.7144	-2.2746	19	-2.4
2703	21.4902	-0.78233	18.9932	-2.49699	22	-2.6
2704	24.006	-0.8818	21.1915	-2.81447	25	-3
2706	22.2864	-0.9064	19.3934	-2.89299	23	-3
2707	21.9619	-0.6157	19.9967	-1.96515	22	-2
2782	22.0223	-0.75896	19.5999	-2.4224	23	-2.6
2784	23.181	-0.8286	20.5363	-2.64467	24	-2.8
2785	20.9776	-0.67382	18.8269	-2.15065	21	-2.2
2786	20.9294	-0.81636	18.3238	-2.6056	21	-2.8
2787	23.307	-0.9119	20.3965	-2.91054	24	-3
2792	21.6241	-0.719447	19.3279	-2.29628	22	-2.4
2794	22.1229	-0.74781	19.7361	-2.38681	23	-2.4
2795	24.426	-0.9325	21.4497	-2.97629	25	-3
2796	23.665	-0.8926	20.8161	-2.84894	24	-3
2799	21.4755	-0.5709	19.6533	-1.82216	22	-2
2800	22.6187	-0.8502	19.9051	-2.71361	23	-2.8
2801	22.697	-0.78036	20.2063	-2.4907	23	-2.6
2802	19.867	-0.64489	17.8087	-2.05832	20	-2.2
2803	21.4032	-0.73599	19.0541	-2.34909	22	-2.4
2804	21.7905	-0.7741	19.3198	-2.47072	22	-2.6
2806	21.9605	-0.68777	19.7653	-2.19518	22	-2.2
2807	24.843	-0.69641	22.6202	-2.22276	25	-2.4
2808	21.0463	-0.77243	18.5809	-2.46539	22	-2.6
2809	20.9107	-0.74131	18.5446	-2.36607	21	-2.4
2811	22.781	-0.8015	20.2228	-2.55818	23	-2.6
2812	21.7406	-0.76881	19.2868	-2.45384	22	-2.6
2817	25.667	-0.64803	23.5987	-2.06834	26	-2.2
2818	24.65	-0.5794	22.8007	-1.84929	25	-2
2819	21.1994	-0.72998	18.8695	-2.3299	22	-2.4
2822	23.609	-0.8601	20.8638	-2.74521	24	-2.8
2823	19.347	-0.65556	17.2546	-2.09237	20	-2.2
2824	20.366	-0.8753	17.5723	-2.79373	21	-2.8
2829	21.7453	-0.80507	19.1757	-2.56957	22	-2.6
2830	22.0556	-0.81066	19.4682	-2.58741	23	-2.6
2833	22.675	-0.70238	20.4332	-2.24181	23	-2.4
2834	23.378	-0.8353	20.7119	-2.66606	24	-2.8
2841	22.4857	-0.77358	20.0166	-2.46906	23	-2.6
2842	23.907	-1.0028	20.7063	-3.20067	24	-3.4
2843	23.027	-0.79786	20.4804	-2.54656	24	-2.6
2845	21.7284	-0.725409	19.4131	-2.31531	22	-2.4
2846	21.4117	-0.70749	19.1536	-2.25812	22	-2.4
2847	22.4934	-0.8901	19.6524	-2.84096	23	-3
2848	20.7295	-0.720361	18.4303	-2.2992	21	-2.4
2850	22.798	-0.80386	20.2323	-2.56571	23	-2.6
2851	22.904	-0.8203	20.2858	-2.61818	23	-2.8
2852	17.183	-0.587	15.3095	-1.87355	18	-2
2853	20.6202	-0.67906	18.4528	-2.16738	21	-2.2
2854	21.5589	-0.725923	19.242	-2.31695	22	-2.4
2856	23.317	-0.71925	21.0213	-2.29565	24	-2.4
2857	21.3843	-0.70261	19.1418	-2.24254	22	-2.4
2858	22.77	-0.4556	21.3158	-1.45415	23	-1.6
2860	21.4619	-0.8358	18.7942	-2.66765	22	-2.8
2861	22.802	-0.73309	20.4622	-2.33983	23	-2.4
2863	23.591	-0.8588	20.8499	-2.74106	24	-2.8
2864	22.766	-0.66639	20.6391	-2.12694	23	-2.2
2866	21.3732	-0.79188	18.8457	-2.52747	22	-2.6
2867	20.7159	-0.66805	18.5837	-2.13224	21	-2.2
2868	24.72	-0.5439	22.984	-1.73598	25	-1.8
2869	21.2779	-0.79007	18.7562	-2.52169	22	-2.6
2870	20.457	-0.7036	18.2113	-2.2457	21	-2.4
2871	22.0852	-0.77335	19.6169	-2.46833	23	-2.6
2873	19.545	-0.73118	17.2113	-2.33373	20	-2.4
2875	18.986	-0.5328	17.2854	-1.70056	19	-1.8
2880	20.267	-0.725981	17.9499	-2.31714	21	-2.4
2881	21.3068	-0.77359	18.8377	-2.46909	22	-2.6
2882	21.1733	-0.70677	18.9175	-2.25582	22	-2.4
2884	21.5612	-0.70885	19.2987	-2.26246	22	-2.4
2885	23.491	-0.9037	20.6066	-2.88437	24	-3
2887	20.395	-0.73894	18.0365	-2.3585	21	-2.4
2888	20.7263	-0.65603	18.6324	-2.09387	21	-2.2
2892	21.1338	-0.76654	18.6872	-2.44659	22	-2.6
2893	21.1265	-0.719888	18.8288	-2.29769	22	-2.4
2894	19.196	-1.0758	15.7623	-3.43367	20	-3.6
2898	21.1062	-0.68659	18.9148	-2.19141	22	-2.2
2899	21.3513	-0.5956	19.4503	-1.901	22	-2
2903	22.0751	-0.73549	19.7276	-2.34749	23	-2.4
2906	21.3066	-0.7825	18.8091	-2.49753	22	-2.6
2908	21.661	-0.80197	19.1014	-2.55968	22	-2.6
2909	21.9592	-0.70363	19.7134	-2.2458	22	-2.4
2910	22.3285	-0.77936	19.841	-2.48751	23	-2.6
2911	22.2412	-0.727687	19.9186	-2.32258	23	-2.4
2912	19.749	-0.5868	17.8761	-1.87291	20	-2
2913	20.376	-0.66649	18.2487	-2.12726	21	-2.2
2914	22.1488	-0.73413	19.8057	-2.34315	23	-2.4
2915	23.115	-0.8667	20.3487	-2.76628	24	-2.8
2916	19.995	-0.5862	18.124	-1.871	20	-2
2917	20.01	-0.69757	17.7835	-2.22646	21	-2.4
2919	18.831	-0.4829	17.2897	-1.54129	19	-1.6
2920	21.3798	-0.70911	19.1165	-2.26329	22	-2.4
2921	22.662	-0.79737	20.117	-2.54499	23	-2.6
2922	20.218	-0.62003	18.239	-1.97897	21	-2
2926	20.357	-0.70225	18.1156	-2.2414	21	-2.4
2927	20.045	-0.5143	18.4035	-1.64151	21	-1.8
2928	23.09	-0.8642	20.3317	-2.7583	24	-2.8
2931	21.4489	-0.76286	19.0141	-2.43485	22	-2.6
2932	22.2221	-0.727429	19.9003	-2.32176	23	-2.4
2933	26.473	-0.9394	23.4747	-2.99832	27	-3
2935	21.5957	-0.718972	19.3009	-2.29477	22	-2.4
2939	16.613	-0.3648	15.4487	-1.16434	18	-1.2
2940	18.937	-0.722496	16.631	-2.30602	19	-2.4
2941	22.5001	-0.73552	20.1525	-2.34758	23	-2.4
2942	23.058	-0.7937	20.5247	-2.53328	24	-2.6
2944	19.402	-1.1038	15.879	-3.52304	20	-3.6
2945	23.031	-0.79928	20.4799	-2.55109	24	-2.6
2946	21.971	-0.73419	19.6277	-2.34334	22	-2.4
2947	21.68	-0.723548	19.3706	-2.30937	22	-2.4
2949	20.6387	-0.62255	18.6517	-1.98701	21	-2
2951	21.4193	-0.719539	19.1227	-2.29658	22	-2.4
2952	22.887	-0.6608	20.7779	-2.1091	23	-2.2
2956	21.9608	-0.74343	19.588	-2.37283	22	-2.4
2962	22.3378	-0.74976	19.9448	-2.39304	23	-2.4
2963	24.099	-0.70893	21.8363	-2.26272	25	-2.4
2964	21.9553	-0.5902	20.0715	-1.88376	22	-2
3002	19.937	-0.81212	17.3449	-2.59207	20	-2.6
3005	22.4742	-0.75555	20.0627	-2.41152	23	-2.6
3008	21.818	-0.724853	19.5045	-2.31354	22	-2.4
3009	21.0756	-0.68325	18.8948	-2.18075	22	-2.2
3011	21.3344	-0.728162	19.0103	-2.3241	22	-2.4
3012	22.5538	-0.78541	20.047	-2.50682	23	-2.6
3013	23.185	-0.3417	22.0944	-1.09062	24	-1.2
3014	22.2551	-0.73711	19.9024	-2.35266	23	-2.4
3018	23.106	-0.4369	21.7115	-1.39447	24	-1.4
3021	22.4373	-0.75398	20.0308	-2.4065	23	-2.6
3022	22.6026	-0.73257	20.2644	-2.33817	23	-2.4
3027	23.336	-0.8871	20.5046	-2.83139	24	-3
3028	23.025	-0.717626	20.7345	-2.29047	24	-2.4
3029	21.1036	-0.712329	18.83	-2.27357	22	-2.4
3030	22.3018	-0.65616	20.2075	-2.09429	23	-2.2
3033	20.582	-0.4892	19.0206	-1.5614	21	-1.6
3034	22.15	-0.6006	20.233	-1.91696	23	-2
3035	22.5478	-0.6039	20.6203	-1.92749	23	-2
3036	22.1156	-0.68115	19.9415	-2.17405	23	-2.2
3038	22.1325	-0.74105	19.7673	-2.36524	23	-2.4
3039	21.1048	-0.68282	18.9254	-2.17938	22	-2.2
3041	22.3703	-0.68465	20.1851	-2.18522	23	-2.2
3042	23.262	-0.8811	20.4498	-2.81224	24	-3
3044	22.4151	-0.70655	20.16	-2.25512	23	-2.4
3045	20.611	-0.8611	17.8626	-2.7484	21	-2.8
3047	21.1467	-0.77061	18.6871	-2.45958	22	-2.6
3048	22.1523	-0.73883	19.7942	-2.35815	23	-2.4
3053	21.8297	-0.73415	19.4865	-2.34321	22	-2.4
3054	22.019	-0.712902	19.7436	-2.27539	23	-2.4
3056	20.558	-0.64413	18.5021	-2.05589	21	-2.2
3058	21.8418	-0.74116	19.4762	-2.36559	22	-2.4
3059	22.46	-0.718299	20.1674	-2.29262	23	-2.4
3060	23.156	-0.5528	21.3916	-1.76439	24	-1.8
3061	22.995	-0.70489	20.7452	-2.24982	23	-2.4
3062	22.5199	-0.62174	20.5355	-1.98443	23	-2
3065	22.1473	-0.5829	20.2868	-1.86046	23	-2
3071	22.0281	-0.73074	19.6958	-2.33233	23	-2.4
3072	21.9796	-0.69162	19.7721	-2.20747	22	-2.4
3074	23.207	-0.74072	20.8428	-2.36418	24	-2.4
3075	19.985	-0.8452	17.2873	-2.69765	20	-2.8
3076	20.6837	-0.9146	17.7645	-2.91916	21	-3
3077	21.191	-0.68893	18.9921	-2.19888	22	-2.2
3078	22.069	-0.6264	20.0697	-1.9993	23	-2
3083	21.8413	-0.74111	19.4759	-2.36543	22	-2.4
3084	21.2944	-0.70548	19.0427	-2.25171	22	-2.4
3085	21.935	-0.73267	19.5965	-2.33849	22	-2.4
3087	20.245	-1.0991	16.737	-3.50804	21	-3.6
3090	22.1126	-0.64204	20.0634	-2.04922	23	-2.2
3094	22.3314	-0.4843	20.7856	-1.54576	23	-1.6
3096	21.0142	-0.8243	18.3833	-2.63095	22	-2.8
3097	22.3979	-0.74111	20.0325	-2.36543	23	-2.4
3100	20.362	-0.67854	18.1963	-2.16572	21	-2.2
3101	22.3179	-0.718469	20.0247	-2.29316	23	-2.4
3102	18.163	-0.4746	16.6482	-1.5148	19	-1.6
3105	22.666	-0.6059	20.7321	-1.93387	23	-2
3106	20.141	-0.9033	17.2579	-2.88309	21	-3
3107	20.551	-0.78503	18.0454	-2.50561	21	-2.6
3108	22.1353	-0.64688	20.0706	-2.06467	23	-2.2
3111	22.2627	-0.69296	20.051	-2.21174	23	-2.4
3113	22.5691	-0.67547	20.4132	-2.15592	23	-2.2
3116	22.0741	-0.70089	19.837	-2.23706	23	-2.4
3117	20.7441	-0.81427	18.1452	-2.59893	21	-2.6
3121	23.379	-0.80372	20.8137	-2.56526	24	-2.6
3122	21.9764	-0.713585	19.6988	-2.27757	22	-2.4
3123	22.1049	-0.5808	20.2511	-1.85376	23	-2
3124	21.0886	-0.69675	18.8648	-2.22384	22	-2.4
3126	20.619	-1.0137	17.3835	-3.23546	21	-3.4
3127	21.8593	-0.722531	19.5532	-2.30613	22	-2.4
3129	22.3798	-0.78003	19.8902	-2.48965	23	-2.6
3131	22.3848	-0.66043	20.2769	-2.10792	23	-2.2
3132	22.1971	-0.7762	19.7197	-2.47742	23	-2.6
3133	20.887	-0.73105	18.5537	-2.33332	21	-2.4
3134	20.151	-0.65697	18.0541	-2.09687	21	-2.2
3135	22.3788	-0.78362	19.8777	-2.50111	23	-2.6
3198	18.841	-0.63217	16.8233	-2.01772	19	-2.2
3199	20.193	-0.65047	18.1169	-2.07613	21	-2.2
3201	21.5494	-0.9807	18.4193	-3.13013	22	-3.2
3202	23.28	-0.63386	21.2569	-2.02311	24	-2.2
3203	21.0001	-0.73186	18.6642	-2.3359	22	-2.4
3204	19.045	-0.5087	17.4214	-1.62364	20	-1.8
3208	21.4599	-0.70797	19.2002	-2.25965	22	-2.4
3209	21.9909	-0.6109	20.0411	-1.94983	22	-2
3214	21.0103	-0.65492	18.92	-2.09033	22	-2.2
3215	20.8331	-0.69723	18.6077	-2.22537	21	-2.4
3220	20.9816	-0.67411	18.83	-2.15158	21	-2.2
3221	23.377	-0.81777	20.7669	-2.61011	24	-2.8
3222	22.964	-0.76184	20.5324	-2.43159	23	-2.6
3224	21.0157	-0.70384	18.7692	-2.24647	22	-2.4
3225	21.2901	-0.68697	19.0975	-2.19263	22	-2.2
3226	20.839	-0.8229	18.2125	-2.62648	21	-2.8
3227	21.0097	-0.8301	18.3602	-2.64946	22	-2.8
3229	21.3397	-0.70357	19.0941	-2.24561	22	-2.4
3230	24.049	-0.80689	21.4736	-2.57538	25	-2.6
3231	21.912	-0.73169	19.5766	-2.33536	22	-2.4
3232	20.6549	-0.685	18.4686	-2.18634	21	-2.2
3236	19.658	-0.69117	17.452	-2.20603	20	-2.4
3237	22.1813	-0.68223	20.0038	-2.1775	23	-2.2
3238	21.7789	-0.68427	19.5949	-2.18401	22	-2.2
3239	22.6192	-0.66493	20.4969	-2.12228	23	-2.2
3240	21.6771	-0.72489	19.3635	-2.31366	22	-2.4
3241	21.3937	-0.722929	19.0863	-2.3074	22	-2.4
3242	20.179	-0.5971	18.2732	-1.90579	21	-2
3243	20.8617	-0.66561	18.7372	-2.12445	21	-2.2
3245	21.9426	-0.714127	19.6633	-2.2793	22	-2.4
3247	19.957	-0.73483	17.6116	-2.34538	20	-2.4
3248	20.596	-0.8605	17.8495	-2.74649	21	-2.8
3249	19.807	-0.5656	18.0018	-1.80525	20	-2
3250	24.283	-0.68607	22.0932	-2.18975	25	-2.2
3251	18.744	-0.5634	16.9458	-1.79822	19	-1.8
3252	18.279	-0.5163	16.6311	-1.64789	19	-1.8
3253	17.417	-0.68009	15.2463	-2.17067	18	-2.2
3255	22.923	-0.63344	20.9012	-2.02177	23	-2.2
3256	22.98	-0.79986	20.4271	-2.55294	23	-2.6
3258	21.7833	-0.726231	19.4654	-2.31794	22	-2.4
3260	22.3368	-0.73695	19.9847	-2.35215	23	-2.4
3262	18.733	-0.68032	16.5616	-2.1714	19	-2.2
3265	21.2076	-0.7333	18.8671	-2.3405	22	-2.4
3267	20.283	-0.6818	18.1069	-2.17612	21	-2.2
3268	24.445	-0.77294	21.978	-2.46702	25	-2.6
3269	20.355	-0.64759	18.2881	-2.06694	21	-2.2
3270	18.838	-0.6178	16.8661	-1.97185	19	-2
3272	21.6766	-0.70824	19.4161	-2.26051	22	-2.4
3273	22.636	-0.76666	20.189	-2.44698	23	-2.6
3274	20.656	-0.67742	18.4939	-2.16215	21	-2.2
3275	21.7933	-0.6162	19.8266	-1.96675	22	-2
3276	21.403	-0.7967	18.8601	-2.54286	22	-2.6
3277	19.443	-0.75411	17.0361	-2.40692	20	-2.6
3278	20.392	-0.79954	17.8401	-2.55192	21	-2.6
3279	22.3213	-0.74751	19.9354	-2.38585	23	-2.4
3280	23.995	-0.9797	20.8681	-3.12694	24	-3.2
3281	19.038	-0.5421	17.3078	-1.73024	20	-1.8
3282	21.2039	-0.65585	19.1106	-2.0933	22	-2.2
3283	22.528	-0.75438	20.1202	-2.40778	23	-2.6
3284	19.607	-0.5768	17.766	-1.84099	20	-2
3285	21.5695	-0.6318	19.553	-2.01654	22	-2.2
3286	25.228	-0.76121	22.7984	-2.42958	26	-2.6
3287	20.556	-0.6655	18.4319	-2.1241	21	-2.2
3288	20.6586	-0.6648	18.5367	-2.12187	21	-2.2
3289	21.0466	-0.74492	18.669	-2.37759	22	-2.4
3290	20.04	-0.68355	17.8583	-2.18171	21	-2.2
3291	23.866	-0.8819	21.0512	-2.81479	24	-3
3292	21.5764	-0.8259	18.9403	-2.63605	22	-2.8
3293	21.7702	-0.711055	19.5007	-2.2695	22	-2.4
3294	22.3286	-0.70794	20.069	-2.25956	23	-2.4
3295	20.9063	-0.68155	18.731	-2.17533	21	-2.2
3296	21.9908	-0.76074	19.5627	-2.42808	22	-2.6
3297	20.647	-0.65042	18.571	-2.07597	21	-2.2
3298	21.9784	-0.68611	19.7885	-2.18988	22	-2.2
3299	20.8345	-0.66869	18.7002	-2.13428	21	-2.2
3300	20.151	-0.719467	17.8547	-2.29635	21	-2.4
3301	22.0213	-0.76579	19.5771	-2.4442	23	-2.6
3303	21.2375	-0.63555	19.209	-2.02851	22	-2.2
3304	19.581	-0.63279	17.5613	-2.0197	20	-2.2
3305	19.548	-0.75066	17.1521	-2.39591	20	-2.4
3306	21.334	-0.9576	18.2776	-3.05641	22	-3.2
3307	20.038	-0.68871	17.8398	-2.19818	21	-2.2
3308	18.763	-0.9454	15.7455	-3.01747	19	-3.2
3309	20.107	-0.5881	18.2299	-1.87706	21	-2
3311	21.1671	-0.69363	18.9532	-2.21388	22	-2.4
3312	21.2235	-0.70818	18.9632	-2.26032	22	-2.4
3313	20.275	-0.70114	18.0371	-2.23785	21	-2.4
3314	21.759	-0.76503	19.3172	-2.44177	22	-2.6
3315	20.047	-0.63016	18.0357	-2.0113	21	-2.2
3316	21.4253	-0.63991	19.3829	-2.04242	22	-2.2
3317	23.51	-0.67202	21.3651	-2.14491	24	-2.2
3318	23.247	-0.4956	21.6652	-1.58182	24	-1.6
3319	21.4161	-0.69429	19.2001	-2.21599	22	-2.4
3320	23.748	-0.76507	21.3061	-2.4419	24	-2.6
3322	20.343	-0.8191	17.7286	-2.61435	21	-2.8
3323	20.218	-0.9933	17.0476	-3.17035	21	-3.2
3324	20.7182	-0.7399	18.3566	-2.36156	21	-2.4
3326	22.5614	-0.67205	20.4164	-2.14501	23	-2.2
3330	22.2286	-0.8661	19.4642	-2.76436	23	-2.8
3398	22.0011	-0.75161	19.6022	-2.39894	23	-2.4
3399	20.9367	-0.720114	18.6383	-2.29841	21	-2.4
3400	18.799	-0.4412	17.3908	-1.40819	19	-1.6
3401	23.613	-0.9616	20.5438	-3.06917	24	-3.2
3403	20.8831	-0.67752	18.7206	-2.16246	21	-2.2
3411	22.6196	-0.79007	20.0979	-2.52169	23	-2.6
3414	20.06	-0.75861	17.6387	-2.42128	21	-2.6
3419	22.902	-0.81005	20.3165	-2.58546	23	-2.6
3420	22.3146	-0.63236	20.2963	-2.01833	23	-2.2
3423	24.748	-0.8848	21.924	-2.82405	25	-3
3424	24.198	-0.5209	22.5354	-1.66257	25	-1.8
3425	23.689	-0.8658	20.9256	-2.7634	24	-2.8
3426	22.75	-0.76727	20.3011	-2.44892	23	-2.6
3428	22.1398	-0.7692	19.6847	-2.45508	23	-2.6
3429	22.833	-0.8389	20.1555	-2.67755	23	-2.8
3430	21.7842	-0.73549	19.4367	-2.34749	22	-2.4
3431	23.052	-0.4792	21.5225	-1.52948	24	-1.6
3434	20.9159	-0.69956	18.6831	-2.23281	21	-2.4
3438	21.7244	-0.728153	19.4003	-2.32407	22	-2.4
3439	21.3946	-0.73751	19.0407	-2.35394	22	-2.4
3440	23.05	-0.79594	20.5096	-2.54043	24	-2.6
3441	22.673	-0.77897	20.1867	-2.48627	23	-2.6
3442	22.931	-0.67571	20.7743	-2.15669	23	-2.2
3443	23.198	-0.75761	20.7799	-2.41809	24	-2.6
3445	20.6304	-0.5906	18.7454	-1.88504	21	-2
3446	19.534	-0.8241	16.9037	-2.63031	20	-2.8
3448	20.163	-0.63672	18.1308	-2.03224	21	-2.2
3454	22.858	-0.68087	20.6848	-2.17316	23	-2.2
3455	21.9149	-0.73182	19.5791	-2.33578	22	-2.4
3457	17.93	-0.5598	16.1433	-1.78673	18	-1.8
3459	20.546	-0.67374	18.3956	-2.1504	21	-2.2
3460	19.433	-0.65796	17.333	-2.10003	20	-2.2
3461	20.515	-0.70438	18.2668	-2.24819	21	-2.4
3464	22.2994	-0.65638	20.2044	-2.09499	23	-2.2
3465	20.6876	-1.152	17.0107	-3.67688	21	-3.8
3466	21.3742	-0.75786	18.9553	-2.41889	22	-2.6
3467	20.6792	-0.67937	18.5108	-2.16837	21	-2.2
3468	21.6139	-0.728278	19.2894	-2.32447	22	-2.4
3469	22.944	-0.70347	20.6987	-2.24529	23	-2.4
3470	21.5122	-0.713188	19.2359	-2.27631	22	-2.4
3471	22.824	-0.63879	20.7852	-2.03885	23	-2.2
3472	22.5315	-0.74486	20.1541	-2.3774	23	-2.4
3473	20.6607	-0.69826	18.432	-2.22866	21	-2.4
3474	20.6248	-0.69139	18.4181	-2.20673	21	-2.4
3475	23.056	-0.717589	20.7656	-2.29035	24	-2.4
3477	20.9391	-0.8268	18.3002	-2.63893	21	-2.8
3478	23.051	-0.77015	20.5929	-2.45811	24	-2.6
3480	22.71	-0.718001	20.4183	-2.29167	23	-2.4
3484	22.4644	-0.76717	20.0158	-2.4486	23	-2.6
3486	21.8568	-0.68602	19.6672	-2.18959	22	-2.2
3487	19.86	-0.5701	18.0404	-1.81961	20	-2
3488	20.404	-0.67224	18.2584	-2.14561	21	-2.2
3490	23.854	-0.81395	21.2561	-2.59791	24	-2.6
3493	21.2451	-0.74235	18.8757	-2.36938	22	-2.4
3494	19.48	-1.02	16.2244	-3.25557	20	-3.4
3495	19.653	-0.78034	17.1624	-2.49064	20	-2.6
3498	22.3717	-0.72945	20.0435	-2.32821	23	-2.4
3499	21.361	-0.78178	18.8658	-2.49523	22	-2.6
3500	22.0177	-0.70093	19.7805	-2.23718	23	-2.4
3501	23.435	-0.66299	21.3189	-2.11609	24	-2.2
3502	20.351	-0.66543	18.2271	-2.12388	21	-2.2
3503	19.714	-0.74986	17.3206	-2.39335	20	-2.4
3504	22.992	-0.81645	20.3861	-2.60589	23	-2.8
3506	18.788	-0.76471	16.3472	-2.44075	19	-2.6
3507	20.302	-0.8207	17.6825	-2.61946	21	-2.8
3509	24.552	-0.66441	22.4314	-2.12062	25	-2.2
3510	23.058	-0.8855	20.2317	-2.82628	24	-3
3511	20.429	-1.1128	16.8772	-3.55176	21	-3.6
3514	19.458	-0.7687	17.0045	-2.45349	20	-2.6
3517	21.836	-0.712596	19.5616	-2.27442	22	-2.4
3519	19.708	-0.63815	17.6712	-2.03681	20	-2.2
3521	23.16	-0.80659	20.5856	-2.57442	24	-2.6
3522	23.137	-0.69497	20.9188	-2.21816	24	-2.4
3523	19.546	-0.63126	17.5312	-2.01481	20	-2.2
3524	20.449	-0.6684	18.3156	-2.13336	21	-2.2
3525	22.1207	-0.76867	19.6673	-2.45339	23	-2.6
3527	22.2223	-0.70061	19.9861	-2.23616	23	-2.4
3529	20.7309	-0.68157	18.5555	-2.17539	21	-2.2
3531	23.183	-0.66227	21.0692	-2.11379	24	-2.2
3532	22.633	-0.7477	20.2465	-2.38646	23	-2.4
3533	23.921	-0.8228	21.2948	-2.62616	24	-2.8
3534	22.734	-0.76656	20.2873	-2.44666	23	-2.6
3535	18.92	-0.4905	17.3545	-1.56555	19	-1.6
3536	20.094	-1.1407	16.4532	-3.64081	21	-3.8
3538	23.754	-0.9816	20.621	-3.13301	24	-3.2
3540	20.618	-0.720494	18.3184	-2.29963	21	-2.4
3541	21.4102	-0.7322	19.0732	-2.33699	22	-2.4
3543	20.9084	-0.709693	18.6432	-2.26515	21	-2.4
3544	19.709	-0.584	17.845	-1.86397	20	-2
3545	21.7074	-0.726711	19.388	-2.31947	22	-2.4
3546	22.0556	-0.73779	19.7008	-2.35483	23	-2.4
3548	23.39	-0.75475	20.981	-2.40896	24	-2.6
3549	23.231	-0.78768	20.7169	-2.51407	24	-2.6
3550	21.6919	-0.722351	19.3863	-2.30555	22	-2.4
3551	22.5113	-0.76983	20.0542	-2.45709	23	-2.6
3552	20.9704	-0.719549	18.6738	-2.29661	21	-2.4
3553	21.6254	-0.719373	19.3294	-2.29605	22	-2.4
3554	22.0224	-0.73058	19.6906	-2.33182	23	-2.4
3556	22.823	-0.70001	20.5888	-2.23425	23	-2.4
3557	23.808	-0.8742	21.0178	-2.79021	24	-2.8
3558	23.888	-0.8799	21.0796	-2.80841	24	-3
3559	20.8079	-0.6004	18.8916	-1.91632	21	-2
3561	17.769	-0.3397	16.6848	-1.08423	18	-1.2
3562	21.0641	-0.711796	18.7922	-2.27186	22	-2.4
3563	20.336	-0.5546	18.5659	-1.77014	21	-1.8
3564	21.4764	-0.6386	19.4382	-2.03824	22	-2.2
3565	21.8899	-0.710925	19.6208	-2.26908	22	-2.4
3567	20.9106	-0.76533	18.4679	-2.44273	21	-2.6
3568	19.289	-0.4895	17.7266	-1.56235	20	-1.6
3569	20.8803	-0.67737	18.7183	-2.16199	21	-2.2
3570	21.654	-0.721227	19.352	-2.30197	22	-2.4
3572	20.18	-0.721016	17.8787	-2.30129	21	-2.4
3573	20.8905	-0.9505	17.8568	-3.03374	21	-3.2
3575	20.544	-0.70478	18.2945	-2.24947	21	-2.4
3576	19.83	-0.6178	17.8581	-1.97185	20	-2
3577	21.7083	-0.724267	19.3966	-2.31167	22	-2.4
3578	20.228	-0.720958	17.9269	-2.30111	21	-2.4
3580	19.518	-0.721804	17.2142	-2.30381	20	-2.4
3581	22.865	-0.2245	22.1485	-0.716545	23	-0.8
3582	24.415	-0.67449	22.2622	-2.15279	25	-2.2
3583	21.9025	-0.74715	19.5178	-2.3847	22	-2.4
3584	21.4587	-0.73679	19.1071	-2.35164	22	-2.4
3586	20.55	-0.73646	18.1994	-2.35059	21	-2.4
3587	22.2162	-0.76151	19.7857	-2.43054	23	-2.6
3588	22.886	-0.75479	20.4769	-2.40909	23	-2.6
3589	21.3439	-0.66481	19.222	-2.1219	22	-2.2
3590	20.9135	-1.0194	17.6598	-3.25365	21	-3.4
3592	21.6987	-0.3906	20.452	-1.24669	22	-1.4
3593	23.542	-0.651	21.4642	-2.07782	24	-2.2
3604	22.2024	-0.724164	19.8911	-2.31134	23	-2.4
3607	20.135	-0.5873	18.2605	-1.87451	21	-2
3608	20.609	-0.67536	18.4534	-2.15557	21	-2.2
3611	22.827	-0.75841	20.4064	-2.42064	23	-2.6
3635	23.004	-0.731	20.6708	-2.33316	24	-2.4
3636	20.594	-0.77168	18.131	-2.463	21	-2.6
3637	21.2869	-0.8294	18.6397	-2.64723	22	-2.8
3640	21.5493	-0.716226	19.2632	-2.286	22	-2.4
3641	24.015	-0.81362	21.4181	-2.59686	25	-2.6
3642	22.4498	-0.718312	20.1571	-2.29266	23	-2.4
3645	19.185	-0.4478	17.7557	-1.42926	20	-1.6
3647	21.2663	-0.69925	19.0345	-2.23182	22	-2.4
3648	20.11	-0.65521	18.0187	-2.09126	21	-2.2
3651	23.378	-0.8538	20.6529	-2.7251	24	-2.8
3654	22.754	-0.70111	20.5162	-2.23776	23	-2.4
3658	22.69	-0.9795	19.5637	-3.1263	23	-3.2
3659	22.884	-0.853	20.1614	-2.72255	23	-2.8
3661	22.446	-0.78072	19.9541	-2.49185	23	-2.6
3662	19.627	-0.62057	17.6463	-1.9807	20	-2
3664	23.093	-0.6736	20.943	-2.14995	24	-2.2
3666	19.382	-1.4177	14.8571	-4.52492	20	-4.2
3669	21.9447	-0.67367	19.7945	-2.15018	22	-2.2
3670	22.4996	-0.4606	21.0295	-1.47011	23	-1.6
3671	20.7584	-0.70767	18.4997	-2.2587	21	-2.4
3674	21.2396	-0.76662	18.7928	-2.44685	22	-2.6
3675	21.6821	-0.70213	19.4411	-2.24101	22	-2.4
3677	20.8698	-0.67703	18.7089	-2.1609	21	-2.2
3681	24.184	-0.80927	21.601	-2.58298	25	-2.6
3683	22.626	-0.64183	20.5774	-2.04855	23	-2.2
3684	22.741	-0.63305	20.7205	-2.02053	23	-2.2
3686	20.372	-0.9151	17.4512	-2.92076	21	-3
3687	20.147	-0.8327	17.4892	-2.65776	21	-2.8
3690	21.4429	-0.7357	19.0947	-2.34816	22	-2.4
3692	21.1676	-0.77992	18.6783	-2.4893	22	-2.6
3693	21.391	-0.759	18.9685	-2.42253	22	-2.6
3695	23.074	-0.73894	20.7155	-2.3585	24	-2.4
3699	21.1132	-0.66933	18.9769	-2.13632	22	-2.2
3700	22.697	-0.81059	20.1098	-2.58719	23	-2.6
3701	22.5626	-0.78603	20.0538	-2.5088	23	-2.6
3704	20.9091	-0.81009	18.3235	-2.58559	21	-2.6
3705	21.0172	-0.67763	18.8544	-2.16282	22	-2.2
3710	20.9568	-0.8018	18.3977	-2.55913	21	-2.6
3711	20.066	-0.711737	17.7943	-2.27168	21	-2.4
3712	20.809	-0.9433	17.7982	-3.01076	21	-3.2
3713	18.856	-0.64178	16.8076	-2.04839	19	-2.2
3714	21.3144	-0.8551	18.5851	-2.72925	22	-2.8
3717	20.9772	-0.70127	18.7389	-2.23827	21	-2.4
3718	22.893	-0.79149	20.3668	-2.52623	23	-2.6
3720	17.95	-0.65301	15.8658	-2.08423	18	-2.2
3721	21.4365	-0.7089	19.1739	-2.26262	22	-2.4
3724	21.4468	-0.7273	19.1255	-2.32135	22	-2.4
3725	22.78	-0.8076	20.2024	-2.57765	23	-2.6
3726	21.2197	-0.725718	18.9034	-2.3163	22	-2.4
3727	20.442	-0.65914	18.3382	-2.1038	21	-2.2
3728	22.897	-0.8276	20.2555	-2.64148	23	-2.8
3729	23.823	-0.81278	21.2288	-2.59418	24	-2.6
3730	20.448	-0.65327	18.3629	-2.08506	21	-2.2
3731	23.081	-0.80213	20.5208	-2.56019	24	-2.6
3733	22.5161	-0.67791	20.3524	-2.16371	23	-2.2
3734	22.4808	-0.719254	20.1851	-2.29567	23	-2.4
3736	22.4916	-0.66227	20.3778	-2.11379	23	-2.2
3737	21.9199	-0.543	20.1868	-1.73311	22	-1.8
3738	20.8333	-0.80748	18.256	-2.57726	21	-2.6
3739	21.707	-0.717905	19.4156	-2.29136	22	-2.4
3740	20.9461	-0.713177	18.6698	-2.27627	21	-2.4
3741	19.667	-0.6086	17.7245	-1.94249	20	-2
3742	19.986	-0.74549	17.6066	-2.37941	20	-2.4
3743	21.8003	-0.724355	19.4884	-2.31195	22	-2.4
3744	20.163	-0.7645	17.7229	-2.44008	21	-2.6
3745	20.493	-0.80605	17.9203	-2.5727	21	-2.6
3746	22.0546	-0.73774	19.6999	-2.35467	23	-2.4
3747	23.15	-0.64861	21.0798	-2.07019	24	-2.2
3748	20.7893	-0.6953	18.5701	-2.21921	21	-2.4
3750	22.3424	-0.76025	19.9159	-2.42652	23	-2.6
3754	20.7162	-0.69396	18.5013	-2.21494	21	-2.4
3756	21.9857	-0.6183	20.0123	-1.97345	22	-2
3757	23.109	-0.8661	20.3446	-2.76436	24	-2.8
3758	21.33	-0.74197	18.9618	-2.36817	22	-2.4
3759	20.366	-0.65801	18.2658	-2.10019	21	-2.2
3760	21.7681	-0.714704	19.487	-2.28115	22	-2.4
3762	20.9702	-0.65657	18.8746	-2.0956	21	-2.2
3765	20.7384	-0.9628	17.6654	-3.073	21	-3.2
3768	22.0166	-0.69491	19.7986	-2.21797	23	-2.4
3769	22.433	-0.68175	20.257	-2.17597	23	-2.2
3770	22.3891	-0.5602	20.6011	-1.78801	23	-1.8
3773	20.531	-0.7046	18.2821	-2.2489	21	-2.4
3774	22.624	-0.67294	20.4762	-2.14785	23	-2.2
3778	20.9733	-0.9691	17.8802	-3.09311	21	-3.2
3779	19.557	-0.721758	17.2533	-2.30366	20	-2.4
3780	21.1954	-0.8674	18.4269	-2.76851	22	-2.8
3782	21.3556	-0.69501	19.1373	-2.21829	22	-2.4
3784	21.0275	-0.68571	18.8389	-2.1886	22	-2.2
3786	22.6141	-0.77565	20.1384	-2.47567	23	-2.6
3787	22.4761	-0.73086	20.1434	-2.33271	23	-2.4
3788	22.62	-0.6423	20.5699	-2.05005	23	-2.2
3789	22.5426	-0.64829	20.4734	-2.06917	23	-2.2
3793	21.9539	-0.5301	20.262	-1.69194	22	-1.8
3794	22.017	-0.718827	19.7227	-2.29431	23	-2.4
3796	22.734	-0.726948	20.4138	-2.32023	23	-2.4
3800	20.579	-0.8322	17.9228	-2.65616	21	-2.8
3801	21.6526	-0.70481	19.4031	-2.24957	22	-2.4
3803	22.2216	-0.65408	20.1339	-2.08765	23	-2.2
3804	22.3771	-0.6129	20.4209	-1.95621	23	-2
3806	20.568	-0.65967	18.4625	-2.10549	21	-2.2
3807	22.3166	-0.5752	20.4807	-1.83589	23	-2
3808	21.183	-0.77366	18.7137	-2.46932	22	-2.6
3809	21.6945	-0.719211	19.3989	-2.29553	22	-2.4
3810	21.8777	-0.73024	19.547	-2.33073	22	-2.4
3811	21.0011	-0.74788	18.6141	-2.38703	22	-2.4
3812	20.428	-0.9659	17.3451	-3.0829	21	-3.2
3813	20.7806	-0.8373	18.1082	-2.67244	21	-2.8
3814	23.542	-0.77319	21.0742	-2.46782	24	-2.6
3815	20.8647	-0.69631	18.6423	-2.22244	21	-2.4
3816	22.1432	-0.74151	19.7765	-2.3667	23	-2.4
3817	20.8632	-0.70908	18.6	-2.2632	21	-2.4
3818	22.827	-0.75314	20.4232	-2.40382	23	-2.6
3820	20.095	-0.63337	18.0735	-2.02155	21	-2.2
3821	19.116	-0.6855	16.9281	-2.18793	20	-2.2
3878	20.8675	-0.77722	18.3868	-2.48068	21	-2.6
3879	20.52	-1.1031	16.9992	-3.5208	21	-3.6
3880	22.5018	-0.6096	20.5561	-1.94568	23	-2
3881	21.3923	-0.78826	18.8764	-2.51592	22	-2.6
3885	20.9438	-0.727292	18.6225	-2.32132	21	-2.4
3889	22.677	-0.76414	20.2381	-2.43893	23	-2.6
3891	22.885	-0.4999	21.2895	-1.59555	23	-1.6
3893	21.517	-0.71201	19.2445	-2.27255	22	-2.4
3894	20.9719	-0.6918	18.7639	-2.20804	21	-2.4
3895	20.234	-0.64071	18.189	-2.04498	21	-2.2
3896	22.5929	-0.6138	20.6338	-1.95909	23	-2
3898	21.6252	-0.719062	19.3301	-2.29505	22	-2.4
3901	23.036	-0.5203	21.3753	-1.66066	24	-1.8
3902	20.835	-0.77972	18.3463	-2.48866	21	-2.6
3903	22.805	-0.76961	20.3486	-2.45639	23	-2.6
3907	23.869	-0.5462	22.1257	-1.74333	24	-1.8
3908	22.939	-0.65838	20.8376	-2.10137	23	-2.2
3909	23.214	-0.78694	20.7023	-2.5117	24	-2.6
3910	22.4777	-0.74335	20.1051	-2.37258	23	-2.4
3911	21.3355	-0.723861	19.0251	-2.31037	22	-2.4
3913	22.243	-0.709311	19.9791	-2.26393	23	-2.4
3914	22.3416	-0.729042	20.0147	-2.32691	23	-2.4
3917	20.7932	-0.80894	18.2113	-2.58192	21	-2.6
3918	20.6471	-0.65042	18.5711	-2.07597	21	-2.2
3920	21.5423	-0.713798	19.264	-2.27825	22	-2.4
3921	23.11	-0.3078	22.1276	-0.982416	24	-1
3924	22.5908	-0.7605	20.1635	-2.42731	23	-2.6
3926	21.1876	-0.70717	18.9305	-2.2571	22	-2.4
3927	21.4151	-0.716534	19.1281	-2.28699	22	-2.4
3928	22.4601	-0.77878	19.9744	-2.48566	23	-2.6
3931	20.526	-0.76984	18.0689	-2.45713	21	-2.6
3932	21.2913	-0.7446	18.9147	-2.37657	22	-2.4
3933	20.9498	-0.70051	18.714	-2.23584	21	-2.4
3936	21.8967	-0.73104	19.5634	-2.33329	22	-2.4
3937	22.0881	-0.711793	19.8162	-2.27185	23	-2.4
3938	20.8395	-0.75535	18.4286	-2.41088	21	-2.6
3939	22.0553	-0.67211	19.9101	-2.1452	23	-2.2
3940	20.421	-0.68567	18.2325	-2.18848	21	-2.2
3941	22.6073	-0.7892	20.0884	-2.51892	23	-2.6
3942	22.3889	-0.77373	19.9194	-2.46954	23	-2.6
3943	21.9577	-0.73363	19.6161	-2.34155	22	-2.4
3944	22.5818	-0.70388	20.3352	-2.2466	23	-2.4
3945	21.4924	-0.70337	19.2474	-2.24497	22	-2.4
3946	23.149	-0.73994	20.7873	-2.36169	24	-2.4
3949	23.79	-0.7486	21.4007	-2.38933	24	-2.4
3950	21.4584	-0.726764	19.1388	-2.31964	22	-2.4
3951	22.956	-0.717709	20.6653	-2.29074	23	-2.4
3952	20.033	-0.8913	17.1882	-2.84479	21	-3
3953	19.294	-0.8267	16.6554	-2.63861	20	-2.8
3954	21.4109	-0.65246	19.3284	-2.08248	22	-2.2
3962	21.7317	-0.720808	19.4311	-2.30063	22	-2.4
3965	21.8501	-0.69068	19.6456	-2.20447	22	-2.4
3968	21.1451	-0.599	19.2333	-1.91185	22	-2
3969	22.936	-0.81244	20.3429	-2.59309	23	-2.6
3971	23.559	-0.4468	22.1329	-1.42607	24	-1.6
3972	22.0957	-0.5708	20.2739	-1.82184	23	-2
3973	22.1762	-0.62288	20.1881	-1.98807	23	-2
3974	22.2849	-0.728276	19.9604	-2.32446	23	-2.4
3976	22.0378	-0.7126	19.7634	-2.27443	23	-2.4
3977	21.1022	-0.68995	18.9001	-2.20214	22	-2.4
3979	23.919	-0.6131	21.9621	-1.95685	24	-2
3980	22.678	-0.5706	20.8568	-1.8212	23	-2
3987	23.143	-0.78392	20.6409	-2.50206	24	-2.6
3988	22.026	-0.724781	19.7127	-2.31331	23	-2.4
3989	21.1085	-0.68309	18.9283	-2.18024	22	-2.2
3990	22.4718	-0.718285	20.1792	-2.29258	23	-2.4
3994	23.444	-0.79669	20.9012	-2.54282	24	-2.6
3999	22.721	-0.66846	20.5875	-2.13355	23	-2.2
4000	22.1684	-0.62423	20.176	-1.99238	23	-2
4001	20.7094	-0.66768	18.5783	-2.13106	21	-2.2
4002	20.6359	-0.8899	17.7956	-2.84033	21	-3
4003	21.6861	-0.720192	19.3874	-2.29866	22	-2.4
4004	21.7014	-0.75251	19.2996	-2.40181	22	-2.6
4008	20.277	-0.68456	18.0921	-2.18493	21	-2.2
4010	22.4152	-0.73004	20.0851	-2.33009	23	-2.4
4013	22.4617	-0.718297	20.1691	-2.29261	23	-2.4
4015	22.765	-0.73475	20.4199	-2.34513	23	-2.4
4017	22.2669	-0.77221	19.8022	-2.46469	23	-2.6
4020	19.962	-0.74589	17.5813	-2.38068	20	-2.4
4021	22.735	-0.6335	20.713	-2.02196	23	-2.2
4024	23.641	-0.74658	21.2581	-2.38289	24	-2.4
4031	22.778	-0.73494	20.4323	-2.34573	23	-2.4
4032	21.8541	-0.6864	19.6633	-2.19081	22	-2.2
4035	21.8234	-0.7337	19.4816	-2.34178	22	-2.4
4040	24.323	-0.67596	22.1655	-2.15749	25	-2.2
4041	23.33	-0.8404	20.6477	-2.68233	24	-2.8
4042	21.9869	-0.73487	19.6414	-2.34551	22	-2.4
4044	22.2476	-0.75488	19.8382	-2.40938	23	-2.6
4045	21.567	-0.714805	19.2855	-2.28147	22	-2.4
4050	21.8322	-0.73432	19.4884	-2.34375	22	-2.4
4051	19.925	-0.76109	17.4958	-2.4292	20	-2.6
4053	22.2139	-0.7445	19.8377	-2.37625	23	-2.4
4054	20.8288	-0.67445	18.6761	-2.15267	21	-2.2
4057	22.2607	-0.76466	19.8201	-2.44059	23	-2.6
4061	19.142	-0.5788	17.2946	-1.84738	20	-2
4062	23.402	-0.8455	20.7034	-2.69861	24	-2.8
4064	22.624	-0.7032	20.3796	-2.24443	23	-2.4
4068	23.196	-0.76373	20.7584	-2.43762	24	-2.6
4071	21.034	-1.0269	17.7564	-3.27759	22	-3.4
4074	22.0145	-0.74723	19.6295	-2.38496	23	-2.4
4103	22.836	-0.77591	20.3595	-2.4765	23	-2.6
4104	22.3138	-0.74476	19.9367	-2.37708	23	-2.4
4108	21.4302	-0.73988	19.0687	-2.3615	22	-2.4
4110	20.84	-0.66408	18.7204	-2.11957	21	-2.2
4112	21.6713	-0.721476	19.3685	-2.30276	22	-2.4
4113	21.6287	-0.719418	19.3325	-2.29619	22	-2.4
4114	20.6816	-0.73435	18.3377	-2.34385	21	-2.4
4115	21.9779	-0.72934	19.65	-2.32786	22	-2.4
4116	21.8293	-0.69661	19.6059	-2.22339	22	-2.4
4117	23.208	-0.76383	20.7701	-2.43794	24	-2.6
4118	23.64	-0.8623	20.8878	-2.75223	24	-2.8
4119	22.0891	-0.711778	19.8173	-2.27181	23	-2.4
4120	22.2853	-0.67234	20.1394	-2.14593	23	-2.2
4121	23.959	-0.8495	21.2476	-2.71138	24	-2.8
4122	21.6471	-0.720837	19.3464	-2.30072	22	-2.4
4123	20.128	-0.67747	17.9657	-2.1623	21	-2.2
4124	21.5786	-0.716368	19.2921	-2.28646	22	-2.4
4125	20.376	-0.70251	18.1338	-2.24223	21	-2.4
4126	21.9433	-0.70437	19.6951	-2.24816	22	-2.4
4131	18.526	-0.637	16.4929	-2.03314	19	-2.2
4150	21.6785	-0.720941	19.3775	-2.30105	22	-2.4
4151	23.141	-0.6996	20.9081	-2.23294	24	-2.4
4153	21.3078	-0.67855	19.142	-2.16575	22	-2.2
4155	22.4712	-0.66881	20.3365	-2.13466	23	-2.2
4156	21.0108	-0.70525	18.7598	-2.25097	22	-2.4
4157	21.6506	-0.64543	19.5905	-2.06004	22	-2.2
4158	21.4806	-0.6396	19.4392	-2.04143	22	-2.2
4159	23.973	-0.66377	21.8544	-2.11858	24	-2.2
4161	20.068	-0.63452	18.0428	-2.02522	21	-2.2
4162	20.527	-0.68954	18.3262	-2.20083	21	-2.4
4163	23.379	-0.8632	20.6239	-2.75511	24	-2.8
4164	23	-0.77785	20.5173	-2.48269	23	-2.6
4166	21.5345	-0.716026	19.2492	-2.28537	22	-2.4
4167	23.51	-0.8265	20.872	-2.63797	24	-2.8
4168	20.7659	-0.5777	18.922	-1.84387	21	-2
4169	21.7511	-0.723222	19.4428	-2.30833	22	-2.4
4170	22.1096	-0.78202	19.6136	-2.496	23	-2.6
4172	21.0022	-0.76685	18.5546	-2.44758	22	-2.6
4173	22.2827	-0.3496	21.1669	-1.11583	23	-1.2
4174	22.722	-0.717987	20.4304	-2.29162	23	-2.4
4175	19.058	-0.76058	16.6304	-2.42757	20	-2.6
4176	22.2436	-0.74836	19.855	-2.38857	23	-2.4
4177	22.881	-0.77528	20.4065	-2.47449	23	-2.6
4179	24.256	-0.78095	21.7634	-2.49259	25	-2.6
4183	21.2463	-0.70186	19.0061	-2.24015	22	-2.4
4184	21.035	-0.73405	18.6921	-2.34289	22	-2.4
4185	24.569	-0.8464	21.8675	-2.70148	25	-2.8
4186	18.173	-0.5261	16.4938	-1.67917	19	-1.8
4187	21.2805	-0.6963	19.0581	-2.22241	22	-2.4
4188	21.6603	-0.722155	19.3554	-2.30493	22	-2.4
4189	21.397	-0.70351	19.1516	-2.24542	22	-2.4
4190	22.5152	-0.9268	19.5571	-2.9581	23	-3
4191	22.993	-0.73783	20.638	-2.35496	23	-2.4
4193	24.003	-0.73262	21.6647	-2.33833	25	-2.4
4194	22.634	-0.74775	20.2474	-2.38662	23	-2.4
4195	21.3457	-0.69834	19.1168	-2.22892	22	-2.4
4196	21.1322	-0.6977	18.9053	-2.22687	22	-2.4
4197	22.1694	-0.72152	19.8665	-2.3029	23	-2.4
4198	21.825	-0.73381	19.4829	-2.34213	22	-2.4
4201	23.649	-0.8629	20.8949	-2.75415	24	-2.8
4202	21.4152	-0.73506	19.0691	-2.34612	22	-2.4
4205	21.2418	-0.9259	18.2866	-2.95523	22	-3
4206	21.0666	-0.69967	18.8334	-2.23316	22	-2.4
4207	20.543	-0.67361	18.393	-2.14998	21	-2.2
4208	20.7425	-0.68206	18.5655	-2.17695	21	-2.2
4209	20.875	-0.72635	18.5567	-2.31832	21	-2.4
4210	24.115	-0.8551	21.3857	-2.72925	25	-2.8
4211	22.3554	-0.77137	19.8934	-2.46201	23	-2.6
4212	21.4741	-0.69432	19.258	-2.21609	22	-2.4
4213	23.526	-0.8809	20.7144	-2.8116	24	-3
4215	21.2331	-0.714077	18.954	-2.27914	22	-2.4
4216	22.959	-0.77603	20.4821	-2.47688	23	-2.6
4217	24.281	-0.6	22.366	-1.91504	25	-2
4218	23.357	-0.8602	20.6115	-2.74553	24	-2.8
4220	20.9999	-0.6692	18.864	-2.13591	21	-2.2
4222	23.095	-0.78188	20.5994	-2.49555	24	-2.6
4223	22.659	-0.66514	20.536	-2.12295	23	-2.2
4224	21.5001	-0.719443	19.2038	-2.29627	22	-2.4
4225	20.6467	-0.69201	18.438	-2.20871	21	-2.4
4226	23.797	-0.78287	21.2983	-2.49871	24	-2.6
4227	21.2389	-0.8645	18.4796	-2.75925	22	-2.8
4229	23.274	-0.3318	22.215	-1.05902	24	-1.2
4230	22.3203	-0.67728	20.1586	-2.1617	23	-2.2
4231	21.7292	-0.720774	19.4287	-2.30052	22	-2.4
4232	20.126	-0.65025	18.0506	-2.07543	21	-2.2
4233	19.017	-0.6001	17.1016	-1.91536	20	-2
4234	19.61	-0.63727	17.576	-2.034	20	-2.2
4235	21.3343	-0.70718	19.0772	-2.25713	22	-2.4
4236	21.6678	-0.722009	19.3633	-2.30446	22	-2.4
4237	21.4713	-0.75146	19.0728	-2.39846	22	-2.4
4238	21.1223	-0.66679	18.9941	-2.12822	22	-2.2
4239	22.0644	-0.723755	19.7544	-2.31003	23	-2.4
4240	21.2527	-0.68153	19.0774	-2.17526	22	-2.2
4241	22.802	-0.73205	20.4655	-2.33651	23	-2.4
4242	22.621	-0.77117	20.1596	-2.46137	23	-2.6
4243	22.769	-0.824	20.139	-2.62999	23	-2.8
4244	22.757	-0.86	20.0121	-2.74489	23	-2.8
4250	21.5891	-0.66051	19.4809	-2.10817	22	-2.2
4251	20.43	-0.63614	18.3996	-2.03039	21	-2.2
4253	22.657	-0.74837	20.2684	-2.3886	23	-2.4
4254	22.0915	-0.725665	19.7754	-2.31613	23	-2.4
4255	21.6938	-0.79418	19.1589	-2.53481	22	-2.6
4256	21.6564	-0.6912	19.4503	-2.20613	22	-2.4
4257	23.496	-0.77084	21.0357	-2.46032	24	-2.6
4258	21.8908	-0.63544	19.8626	-2.02816	22	-2.2
4259	19.746	-0.6309	17.7323	-2.01367	20	-2.2
4260	18.471	-0.3822	17.2511	-1.21988	19	-1.4
4261	18.418	-0.4505	16.9801	-1.43788	19	-1.6
4262	23.173	-0.8886	20.3368	-2.83618	24	-3
4263	21.3536	-0.7042	19.106	-2.24762	22	-2.4
4264	21.7543	-0.713099	19.4783	-2.27602	22	-2.4
4266	23.777	-0.8287	21.132	-2.64499	24	-2.8
4309	21.3518	-0.73237	19.0143	-2.33753	22	-2.4
4310	20.255	-0.62584	18.2575	-1.99752	21	-2
4311	23.288	-0.81383	20.6905	-2.59753	24	-2.6
4312	21.0432	-0.6866	18.8518	-2.19145	22	-2.2
4313	21.2324	-0.9196	18.2973	-2.93512	22	-3
4314	18.618	-0.5686	16.8032	-1.81482	19	-2
4315	21.6246	-0.719627	19.3278	-2.29686	22	-2.4
4316	20.8695	-0.9029	17.9877	-2.88182	21	-3
4317	23.276	-0.76133	20.846	-2.42996	24	-2.6
4318	20.615	-0.74023	18.2524	-2.36262	21	-2.4
4319	22.3773	-0.6958	20.1565	-2.22081	23	-2.4
4322	22.1931	-0.75924	19.7698	-2.42329	23	-2.6
4333	19.271	-1.0036	16.0678	-3.20323	20	-3.4
4334	19.431	-0.5952	17.5313	-1.89972	20	-2
4335	21.3005	-0.78472	18.7959	-2.50462	22	-2.6
4337	21.5811	-0.76379	19.1433	-2.43782	22	-2.6
4338	23.174	-0.78525	20.6677	-2.50631	24	-2.6
4341	21.5762	-0.716831	19.2882	-2.28793	22	-2.4
4343	23.195	-0.76428	20.7556	-2.43938	24	-2.6
4344	21.9202	-0.720513	19.6205	-2.29969	22	-2.4
4345	18.731	-0.5833	16.8693	-1.86174	19	-2
4346	19.463	-0.6116	17.5109	-1.95207	20	-2
4347	20.526	-0.74429	18.1504	-2.37558	21	-2.4
4353	22.0672	-0.73828	19.7108	-2.35639	23	-2.4
4355	19.899	-0.5786	18.0523	-1.84674	20	-2
4356	19.465	-0.68203	17.2881	-2.17686	20	-2.2
4359	22.2499	-0.9232	19.3033	-2.94661	23	-3
4361	22.898	-0.66868	20.7638	-2.13425	23	-2.2
4366	22.4839	-0.73341	20.143	-2.34085	23	-2.4
4373	21.927	-0.7366	19.576	-2.35103	22	-2.4
4374	21.0702	-0.69541	18.8506	-2.21956	22	-2.4
4375	22.767	-0.76412	20.3281	-2.43887	23	-2.6
4376	20.095	-0.6139	18.1356	-1.95941	21	-2
4378	22.4122	-0.75722	19.9954	-2.41685	23	-2.6
4379	22.2805	-0.78442	19.7768	-2.50366	23	-2.6
4380	21.2099	-0.75135	18.8118	-2.39811	22	-2.4
4382	20.394	-0.68491	18.2079	-2.18605	21	-2.2
4385	20.8804	-0.722875	18.5732	-2.30723	21	-2.4
4386	20.9704	-0.67424	18.8184	-2.152	21	-2.2
4387	21.7389	-0.727719	19.4162	-2.32269	22	-2.4
4388	20.429	-0.73839	18.0723	-2.35675	21	-2.4
4389	20.601	-0.75092	18.2043	-2.39674	21	-2.4
4393	22.5458	-0.75635	20.1317	-2.41407	23	-2.6
4395	22.3963	-0.9122	19.4848	-2.9115	23	-3
4396	22.133	-0.74516	19.7546	-2.37835	23	-2.4
4397	22.965	-0.724735	20.6518	-2.31316	23	-2.4
4398	24.74	-0.9114	21.8311	-2.90895	25	-3
4399	21.9997	-0.725328	19.6846	-2.31505	22	-2.4
4402	21.3875	-0.7062	19.1335	-2.254	22	-2.4
4403	20.004	-0.64908	17.9323	-2.07169	21	-2.2
4404	21.4307	-0.719938	19.1328	-2.29785	22	-2.4
4405	21.7842	-0.73092	19.4513	-2.3329	22	-2.4
4406	21.4439	-0.709315	19.18	-2.26395	22	-2.4
4407	22.2233	-0.8633	19.4679	-2.75542	23	-2.8
4410	21.5086	-0.68897	19.3096	-2.19901	22	-2.2
4412	22.891	-0.79135	20.3652	-2.52578	23	-2.6
4416	22.5459	-0.76095	20.1171	-2.42875	23	-2.6
4417	20.155	-0.714498	17.8745	-2.28049	21	-2.4
4418	22.837	-0.5121	21.2025	-1.63449	23	-1.8
4419	23.271	-0.848	20.5644	-2.70659	24	-2.8
4420	20.618	-0.75274	18.2155	-2.40255	21	-2.6
4424	22.183	-0.65826	20.082	-2.10099	23	-2.2
4425	23.249	-0.69318	21.0366	-2.21245	24	-2.4
4428	21.6059	-0.718688	19.312	-2.29386	22	-2.4
4429	22.4304	-0.78558	19.923	-2.50736	23	-2.6
4431	22.902	-0.80791	20.3234	-2.57863	23	-2.6
4432	21.8017	-0.74163	19.4346	-2.36709	22	-2.4
4433	22.803	-0.80303	20.2399	-2.56306	23	-2.6
4434	22.7	-0.76513	20.2579	-2.44209	23	-2.6
4435	22.956	-0.75678	20.5406	-2.41544	23	-2.6
4436	19.753	-0.66247	17.6386	-2.11443	20	-2.2
4438	20.7021	-0.727874	18.3789	-2.32318	21	-2.4
4440	20.577	-0.68253	18.3985	-2.17845	21	-2.2
4441	21.8611	-0.73289	19.5219	-2.33919	22	-2.4
4443	23.012	-0.724922	20.6982	-2.31376	24	-2.4
4444	22.2675	-0.76514	19.8254	-2.44212	23	-2.6
4445	23.74	-0.77874	21.2545	-2.48553	24	-2.6
4446	22.0961	-0.69995	19.862	-2.23405	23	-2.4
4447	20.7221	-0.74237	18.3527	-2.36945	21	-2.4
4448	21.9279	-0.723456	19.6188	-2.30908	22	-2.4
4452	22.796	-0.77041	20.3371	-2.45894	23	-2.6
4453	23.669	-0.77088	21.2086	-2.46044	24	-2.6
4454	23.627	-0.6058	21.6934	-1.93355	24	-2
4456	20.534	-0.66658	18.4065	-2.12755	21	-2.2
4459	21.8048	-0.78941	19.2852	-2.51959	22	-2.6
4460	22.2612	-0.75549	19.8499	-2.41132	23	-2.6
4461	24.804	-0.6879	22.6084	-2.19559	25	-2.2
4462	23.16	-0.7625	20.7263	-2.4337	24	-2.6
4463	22.879	-0.79134	20.3533	-2.52575	23	-2.6
4464	21.3988	-0.73042	19.0675	-2.33131	22	-2.4
4465	26.513	-1.1136	22.9587	-3.55432	27	-3.6
4466	22.4758	-0.3209	21.4516	-1.02423	23	-1.2
4467	19.729	-0.6191	17.753	-1.976	20	-2
4468	19.352	-0.4921	17.7813	-1.57065	20	-1.6
4469	20.8406	-0.65637	18.7456	-2.09496	21	-2.2
4470	18.719	-0.70439	16.4708	-2.24823	19	-2.4
4471	21.293	-0.8505	18.5784	-2.71457	22	-2.8
4472	19.135	-0.64898	17.0636	-2.07137	20	-2.2
4473	22.321	-0.65407	20.2334	-2.08762	23	-2.2
4474	21.2886	-0.70524	19.0377	-2.25094	22	-2.4
4504	19.566	-0.9464	16.5453	-3.02066	20	-3.2
4505	17.218	-0.6127	15.2624	-1.95558	18	-2
4506	19.818	-0.64283	17.7663	-2.05174	20	-2.2
4507	20.9619	-0.70654	18.7068	-2.25509	21	-2.4
4508	19.031	-0.4999	17.4355	-1.59555	20	-1.6
4509	22.249	-0.74599	19.868	-2.381	23	-2.4
4510	20.8741	-0.73693	18.522	-2.35209	21	-2.4
4511	21.519	-0.715012	19.2369	-2.28213	22	-2.4
4512	23.376	-0.81886	20.7624	-2.61358	24	-2.8
4513	21.1988	-0.68948	18.9982	-2.20064	22	-2.4
4514	20.8285	-0.75586	18.416	-2.4125	21	-2.6
4515	22.5123	-0.5835	20.6499	-1.86238	23	-2
4516	21.767	-0.72971	19.438	-2.32904	22	-2.4
4517	22.4706	-0.74519	20.0922	-2.37845	23	-2.4
4518	18.902	-0.6026	16.9787	-1.92334	19	-2
4519	21.1784	-0.81821	18.5669	-2.61151	22	-2.8
4520	21.582	-0.717685	19.2913	-2.29066	22	-2.4
4529	23.126	-0.75507	20.716	-2.40998	24	-2.6
4562	21.7122	-0.3798	20.5	-1.21222	22	-1.4
4563	21.1902	-0.9019	18.3116	-2.87863	22	-3
4568	22.2827	-0.70867	20.0208	-2.26189	23	-2.4
4569	21.2338	-0.7927	18.7037	-2.53009	22	-2.6
4570	21.232	-0.69183	19.0239	-2.20814	22	-2.4
4571	20.7832	-0.64837	18.7138	-2.06943	21	-2.2
4572	23.982	-0.5375	22.2664	-1.71556	24	-1.8
4573	19.62	-0.66322	17.5032	-2.11682	20	-2.2
4574	21.366	-0.81743	18.757	-2.60902	22	-2.8
4575	20.492	-0.5921	18.6022	-1.88983	21	-2
4576	21.8414	-0.5985	19.9311	-1.91025	22	-2
4578	22.303	-0.728521	19.9778	-2.32525	23	-2.4
4579	21.4517	-0.709757	19.1863	-2.26536	22	-2.4
4580	19.716	-0.80725	17.1395	-2.57653	20	-2.6
4581	22.934	-0.5346	21.2277	-1.7063	23	-1.8
4582	19.669	-1.1229	16.085	-3.584	20	-3.6
4583	21.2609	-0.714451	18.9806	-2.28034	22	-2.4
4584	21.9978	-0.75133	19.5998	-2.39805	22	-2.4
4588	21.6153	-0.719237	19.3197	-2.29561	22	-2.4
4589	19.226	-0.941	16.2226	-3.00342	20	-3.2
4590	22.3328	-0.73929	19.9732	-2.35962	23	-2.4
4591	22.2959	-0.2472	21.5069	-0.788997	23	-0.8
4592	22.2276	-0.75374	19.8219	-2.40574	23	-2.6
4593	22.768	-0.7348	20.4227	-2.34529	23	-2.4
4594	20.559	-0.80096	18.0025	-2.55645	21	-2.6
4595	21.546	-0.716161	19.2602	-2.2858	22	-2.4
4596	22.4728	-0.73081	20.1402	-2.33255	23	-2.4
4597	22.771	-0.5198	21.1119	-1.65906	23	-1.8
4598	22.219	-0.75657	19.8042	-2.41477	23	-2.6
4599	21.9039	-0.74336	19.5313	-2.37261	22	-2.4
4600	22.2567	-0.3982	20.9858	-1.27095	23	-1.4
4602	18.876	-0.5251	17.2	-1.67598	19	-1.8
4604	21.3531	-0.75681	18.9376	-2.41554	22	-2.6
4605	21.1338	-0.68488	18.9478	-2.18596	22	-2.2
4606	22.997	-0.7379	20.6418	-2.35518	23	-2.4
4607	22.4261	-0.75351	20.0211	-2.405	23	-2.6
4608	20.7873	-0.66035	18.6796	-2.10766	21	-2.2
4609	21.0617	-0.771	18.6009	-2.46083	22	-2.6
4610	21.1982	-0.719803	18.9008	-2.29742	22	-2.4
4612	20.534	-0.720594	18.2341	-2.29995	21	-2.4
4613	19.982	-0.77014	17.5239	-2.45808	20	-2.6
4615	18.997	-0.4607	17.5266	-1.47043	19	-1.6
4616	18.185	-0.67293	16.0372	-2.14781	19	-2.2
4617	21.0597	-0.70359	18.814	-2.24567	22	-2.4
4619	20.383	-0.8732	17.596	-2.78702	21	-2.8
4620	22.836	-0.6067	20.8996	-1.93643	23	-2
4621	20.596	-0.8632	17.8409	-2.75511	21	-2.8
4622	20.174	-0.65794	18.074	-2.09997	21	-2.2
4623	21.0848	-0.66654	18.9574	-2.12742	22	-2.2
4625	22.827	-0.80475	20.2585	-2.56855	23	-2.6
4626	21.9776	-0.70279	19.7345	-2.24312	22	-2.4
4627	21.849	-0.74188	19.4811	-2.36788	22	-2.4
4628	21.6231	-0.70258	19.3806	-2.24245	22	-2.4
4629	20.174	-0.8082	17.5944	-2.57956	21	-2.6
4630	21.0875	-0.67416	18.9358	-2.15174	22	-2.2
4631	19.458	-0.4454	18.0364	-1.4216	20	-1.6
4632	19.363	-0.4967	17.7777	-1.58533	20	-1.6
4635	23.127	-0.79273	20.5968	-2.53018	24	-2.6
4636	27.178	-1.0042	23.9729	-3.20514	28	-3.4
4637	21.8835	-0.74528	19.5048	-2.37874	22	-2.4
4638	22.635	-0.80537	20.0645	-2.57053	23	-2.6
4640	23.133	-0.8685	20.361	-2.77202	24	-2.8
4641	21.2329	-0.68649	19.0418	-2.19109	22	-2.2
4642	20.9189	-0.74106	18.5536	-2.36527	21	-2.4
4643	21.126	-0.8916	18.2802	-2.84575	22	-3
4644	22.0312	-0.64802	19.9629	-2.06831	23	-2.2
4645	22.4774	-0.69269	20.2665	-2.21088	23	-2.4
4646	18.857	-0.4851	17.3087	-1.54831	19	-1.6
4647	21.6332	-0.717662	19.3426	-2.29059	22	-2.4
4648	21.1577	-0.9067	18.2638	-2.89395	22	-3
4649	21.9582	-0.64933	19.8857	-2.07249	22	-2.2
4650	19.894	-0.9901	16.7339	-3.16014	20	-3.2
4651	22.763	-0.4828	21.222	-1.54097	23	-1.6
4652	22.5619	-0.3192	21.5431	-1.0188	23	-1.2
4653	22.5814	-0.68946	20.3808	-2.20057	23	-2.4
4654	22.3757	-0.6131	20.4188	-1.95685	23	-2
4655	21.1832	-0.68837	18.9861	-2.19709	22	-2.2
4656	23.495	-0.8521	20.7753	-2.71968	24	-2.8
4659	20.49	-1.1345	16.869	-3.62102	21	-3.8
4661	21.9777	-0.69176	19.7698	-2.20791	22	-2.4
4663	21.7699	-0.6247	19.776	-1.99388	22	-2
4664	22.699	-0.74956	20.3066	-2.3924	23	-2.4
4665	21.6629	-0.718612	19.3693	-2.29362	22	-2.4
4667	21.7919	-0.711363	19.5214	-2.27048	22	-2.4
4668	22.816	-0.78709	20.3038	-2.51218	23	-2.6
4669	21.8884	-0.6902	19.6855	-2.20294	22	-2.4
4670	21.2142	-0.69057	19.0101	-2.20412	22	-2.4
4671	19.018	-0.4987	17.4263	-1.59172	20	-1.6
4672	22.812	-0.73539	20.4648	-2.34717	23	-2.4
4673	23.673	-0.6245	21.6798	-1.99324	24	-2
4674	23.075	-0.8223	20.4504	-2.62456	24	-2.8
4675	23.198	-0.76356	20.7609	-2.43708	24	-2.6
4676	21.8152	-0.73585	19.4666	-2.34864	22	-2.4
4678	22.0555	-0.5755	20.2187	-1.83684	23	-2
4679	21.6855	-0.72576	19.3691	-2.31643	22	-2.4
4682	21.7133	-0.70466	19.4642	-2.24909	22	-2.4
4687	21.1371	-0.710946	18.8679	-2.26915	22	-2.4
4688	22.0711	-0.8616	19.3211	-2.75	23	-2.8
4689	21.4367	-0.723489	19.1275	-2.30919	22	-2.4
4690	22.3283	-0.76826	19.8762	-2.45208	23	-2.6
4734	21.9593	-0.739	19.6006	-2.35869	22	-2.4
5056	23.636	-0.8587	20.8953	-2.74074	24	-2.8
5058	21.2137	-0.9361	18.2259	-2.98778	22	-3
5059	22.994	-0.6105	21.0454	-1.94855	23	-2
5060	22.3026	-0.7574	19.8852	-2.41742	23	-2.6
5061	19.766	-0.6075	17.827	-1.93898	20	-2
5063	20.6465	-0.65514	18.5555	-2.09103	21	-2.2
5066	23.115	-0.5732	21.2855	-1.8295	24	-2
5067	23.807	-0.8215	21.185	-2.62201	24	-2.8
5069	23.318	-0.5516	21.5574	-1.76056	24	-1.8
5072	18.743	-0.8243	16.1121	-2.63095	19	-2.8
5073	22.3834	-0.78174	19.8883	-2.49511	23	-2.6
5075	22.842	-0.77172	20.3789	-2.46313	23	-2.6
5076	21.3287	-0.70269	19.0859	-2.2428	22	-2.4
5077	20.7929	-0.8962	17.9325	-2.86043	21	-3
5078	22.1381	-0.73507	19.792	-2.34615	23	-2.4
5080	21.5824	-0.65606	19.4884	-2.09397	22	-2.2
5084	21.1431	-0.66922	19.0071	-2.13597	22	-2.2
5085	20.347	-0.68711	18.1539	-2.19307	21	-2.2
5086	23.473	-1.0624	20.0821	-3.3909	24	-3.4
5087	24.902	-0.64556	22.8415	-2.06046	25	-2.2
5089	23.207	-0.80043	20.6522	-2.55476	24	-2.6
5092	21.2917	-0.76383	18.8538	-2.43794	22	-2.6
5094	21.3486	-0.5526	19.5848	-1.76375	22	-1.8
5095	21.8652	-0.7332	19.525	-2.34018	22	-2.4
5096	24.611	-0.70785	22.3517	-2.25927	25	-2.4
5097	20.282	-0.78103	17.7892	-2.49284	21	-2.6
5100	22.647	-0.69751	20.4207	-2.22627	23	-2.4
5101	19.753	-0.66694	17.6243	-2.1287	20	-2.2
5102	21.7127	-0.718945	19.4181	-2.29468	22	-2.4
5103	20.365	-0.716229	18.079	-2.28601	21	-2.4
5105	21.0865	-0.5475	19.339	-1.74747	22	-1.8
5106	19.921	-0.80465	17.3528	-2.56823	20	-2.6
5107	19.656	-0.4117	18.342	-1.31404	20	-1.4
5108	23.063	-0.711588	20.7918	-2.2712	24	-2.4
5109	21.958	-0.725146	19.6435	-2.31447	22	-2.4
5111	20.8428	-1.0642	17.4462	-3.39664	21	-3.4
5112	21.2078	-0.73834	18.8512	-2.35659	22	-2.4
5113	19.562	-0.619	17.5863	-1.97568	20	-2
5114	23.533	-0.8423	20.8446	-2.6884	24	-2.8
5118	22.1864	-0.75845	19.7656	-2.42077	23	-2.6
5119	20.371	-0.6925	18.1607	-2.21028	21	-2.4
5120	21.0789	-0.754	18.6723	-2.40657	22	-2.6
5121	19.992	-0.3006	19.0326	-0.959436	20	-1
5122	20.6792	-0.75213	18.2786	-2.4006	21	-2.6
5124	22.0951	-0.73877	19.7371	-2.35796	23	-2.4
5125	20.444	-0.727921	18.1207	-2.32333	21	-2.4
5127	18.646	-0.4985	17.0549	-1.59108	19	-1.6
5128	21.5505	-0.713619	19.2729	-2.27768	22	-2.4
5129	20.6662	-0.8348	18.0017	-2.66446	21	-2.8
5130	23.015	-0.717103	20.7262	-2.2888	24	-2.4
5132	23.258	-0.67982	21.0882	-2.16981	24	-2.2
5133	21.7864	-0.5485	20.0357	-1.75067	22	-1.8
5135	20.079	-0.62426	18.0865	-1.99247	21	-2
5137	22.735	-0.69772	20.5081	-2.22694	23	-2.4
5141	21.5601	-0.70325	19.3156	-2.24459	22	-2.4
5142	21.3159	-0.713087	19.0399	-2.27598	22	-2.4
5144	20.9349	-0.63683	18.9023	-2.03259	21	-2.2
5145	22.869	-0.69077	20.6642	-2.20475	23	-2.4
5146	23.83	-0.8631	21.0752	-2.75479	24	-2.8
5147	21.5781	-0.723158	19.27	-2.30813	22	-2.4
5149	22.5623	-0.67196	20.4176	-2.14472	23	-2.2
5150	21.745	-0.6184	19.7712	-1.97377	22	-2
5151	21.9166	-0.73219	19.5796	-2.33696	22	-2.4
5152	21.5552	-0.723828	19.2449	-2.31027	22	-2.4
5153	23.049	-0.7656	20.6054	-2.44359	24	-2.6
5156	20.9453	-0.68942	18.7449	-2.20045	21	-2.4
5157	20.6334	-0.6101	18.6861	-1.94728	21	-2
5158	24.486	-0.65969	22.3804	-2.10556	25	-2.2
5226	22.1614	-0.8206	19.5423	-2.61914	23	-2.8
5227	21.3329	-0.69897	19.102	-2.23093	22	-2.4
5232	20.8636	-0.8214	18.2419	-2.62169	21	-2.8
5234	19.474	-0.68701	17.2812	-2.19275	20	-2.2
5235	19.782	-0.68653	17.5908	-2.19122	20	-2.2
5236	19.253	-1.1458	15.5959	-3.65709	20	-3.8
5242	19.331	-0.67562	17.1746	-2.1564	20	-2.2
5243	23.123	-0.8232	20.4956	-2.62744	24	-2.8
5247	20.001	-0.8016	17.4425	-2.55849	21	-2.6
5248	19.849	-0.76521	17.4067	-2.44235	20	-2.6
5250	21.8318	-0.717517	19.5417	-2.29012	22	-2.4
5265	19.074	-0.5035	17.467	-1.60704	20	-1.8
5273	21.2943	-0.710165	19.0276	-2.26666	22	-2.4
5276	21.5073	-0.709408	19.2431	-2.26424	22	-2.4
5312	21.5617	-0.717956	19.2702	-2.29153	22	-2.4
5326	22.3297	-0.74556	19.9501	-2.37963	23	-2.4
5331	22.5581	-0.70426	20.3103	-2.24781	23	-2.4
5332	22.5035	-0.62352	20.5134	-1.99011	23	-2
5345	21.3718	-0.8806	18.5612	-2.81064	22	-3
5403	21.8755	-0.724519	19.563	-2.31247	22	-2.4
5407	25.674	-0.8988	22.8053	-2.86873	26	-3
5420	25.905	-0.5949	24.0062	-1.89876	26	-2
5421	20.754	-0.8833	17.9347	-2.81926	21	-3
5422	23.195	-0.8579	20.4568	-2.73819	24	-2.8
5423	24.422	-0.8382	21.7467	-2.67531	25	-2.8
5425	22.77	-0.78447	20.2662	-2.50382	23	-2.6
5426	23.21	-0.79176	20.6829	-2.52709	24	-2.6
5427	20.158	-0.73335	17.8173	-2.34066	21	-2.4
5428	21.2272	-0.70735	18.9695	-2.25767	22	-2.4
5430	21.5938	-0.8445	18.8983	-2.69542	22	-2.8
5431	22.561	-0.75686	20.1453	-2.4157	23	-2.6
5433	20.769	-0.7032	18.5246	-2.24443	21	-2.4
5435	20.1	-0.63316	18.0791	-2.02088	21	-2.2
5436	21.4877	-0.70808	19.2277	-2.26	22	-2.4
5437	23.461	-0.8236	20.8323	-2.62871	24	-2.8
5438	22.99	-0.7788	20.5043	-2.48572	23	-2.6
5439	21.7694	-0.761	19.3405	-2.42891	22	-2.6
5441	19.323	-0.68828	17.1262	-2.19681	20	-2.2
5442	25.283	-0.80314	22.7196	-2.56341	26	-2.6
5443	21.8286	-0.79078	19.3046	-2.52396	22	-2.6
5444	21.25	-0.5802	19.3982	-1.85184	22	-2
5446	20.267	-0.6046	18.3373	-1.92972	21	-2
5447	23.009	-0.81772	20.3991	-2.60995	24	-2.8
5451	23.392	-0.894	20.5386	-2.85341	24	-3
5452	22.904	-0.62046	20.9237	-1.98034	23	-2
5455	21.9195	-0.75783	19.5007	-2.41879	22	-2.6
5456	22.5041	-0.76677	20.0568	-2.44733	23	-2.6
5457	24.405	-0.8375	21.7319	-2.67308	25	-2.8
5458	19.4	-0.8428	16.71	-2.68999	20	-2.8
5459	22.4751	-0.79679	19.932	-2.54314	23	-2.6
5460	20.109	-0.5957	18.2077	-1.90132	21	-2
5462	24.673	-0.6079	22.7327	-1.94026	25	-2
5463	22.4341	-0.75385	20.028	-2.40609	23	-2.6
5464	22.4222	-0.7873	19.9093	-2.51285	23	-2.6
5465	22.132	-0.74103	19.7668	-2.36517	23	-2.4
5466	20.018	-0.64917	17.946	-2.07198	21	-2.2
5467	23.156	-0.9397	20.1567	-2.99927	24	-3
5468	20.589	-0.73444	18.2449	-2.34414	21	-2.4
5469	21.5174	-0.725	19.2034	-2.31401	22	-2.4
5471	22.0817	-0.74119	19.716	-2.36568	23	-2.4
5472	22.2489	-0.74599	19.8679	-2.381	23	-2.4
5473	22.2761	-0.718518	19.9828	-2.29332	23	-2.4
5474	23.507	-0.8529	20.7848	-2.72223	24	-2.8
5475	18.365	-0.70615	16.1112	-2.25384	19	-2.4
5476	20.9683	-0.5849	19.1015	-1.86685	21	-2
5477	18.274	-0.488	16.7164	-1.55757	19	-1.6
5479	22.1298	-0.7482	19.7417	-2.38806	23	-2.4
5480	25.381	-0.68423	23.1971	-2.18388	26	-2.2
5482	20.002	-0.6047	18.072	-1.93004	21	-2
5483	20.415	-0.64965	18.3415	-2.07351	21	-2.2
5484	17.329	-0.5734	15.4989	-1.83014	18	-2
5485	20.535	-0.67365	18.3849	-2.15011	21	-2.2
5486	22.737	-0.722794	20.43	-2.30697	23	-2.4
5489	21.4474	-0.711974	19.175	-2.27243	22	-2.4
5490	23.387	-0.77019	20.9288	-2.45824	24	-2.6
5491	21.534	-0.6847	19.3486	-2.18538	22	-2.2
5493	20.346	-0.64709	18.2807	-2.06534	21	-2.2
5494	21.3031	-0.5063	19.6871	-1.61598	22	-1.8
5495	24.078	-0.5548	22.3072	-1.77077	25	-1.8
5496	27.146	-0.66876	25.0115	-2.1345	28	-2.2
5499	22.61	-0.78939	20.0905	-2.51952	23	-2.6
5500	22.531	-0.78355	20.0301	-2.50088	23	-2.6
5501	20.7356	-0.4517	19.2939	-1.44171	21	-1.6
5502	21.6116	-0.67953	19.4427	-2.16888	22	-2.2
5505	21.4145	-0.77718	18.9339	-2.48055	22	-2.6
5506	20.482	-0.67454	18.329	-2.15295	21	-2.2
5509	23.171	-0.8291	20.5247	-2.64627	24	-2.8
5510	22.891	-0.62575	20.8938	-1.99723	23	-2
5512	19.823	-0.80959	17.239	-2.584	20	-2.6
5513	22.5874	-0.75225	20.1864	-2.40098	23	-2.6
5514	21.2283	-0.68518	19.0414	-2.18691	22	-2.2
5515	20.105	-0.67721	17.9435	-2.16147	21	-2.2
5516	17.615	-0.4632	16.1366	-1.47841	18	-1.6
5520	22.4034	-0.5894	20.5222	-1.88121	23	-2
5521	19.788	-0.9146	16.8688	-2.91916	20	-3
5523	23.283	-0.80402	20.7168	-2.56622	24	-2.6
5525	21.7762	-0.5884	19.8982	-1.87802	22	-2
5526	24.057	-0.8921	21.2097	-2.84735	25	-3
5527	20.742	-0.257	19.9217	-0.820276	21	-1
5528	23.381	-0.80697	20.8054	-2.57563	24	-2.6
5530	21.0596	-0.721875	18.7556	-2.30403	22	-2.4
5531	20.6735	-0.5805	18.8207	-1.8528	21	-2
5532	21.4537	-0.723099	19.1458	-2.30794	22	-2.4
5535	20.617	-0.716742	18.3293	-2.28765	21	-2.4
5536	20.029	-0.69809	17.8009	-2.22812	21	-2.4
5537	19.263	-0.5525	17.4996	-1.76343	20	-1.8
5538	20.052	-0.63093	18.0382	-2.01376	21	-2.2
5540	20.422	-0.6177	18.4505	-1.97153	21	-2
5541	22.384	-0.79462	19.8478	-2.53622	23	-2.6
5542	20.57	-0.718627	18.2763	-2.29367	21	-2.4
5543	20.347	-0.67802	18.1829	-2.16406	21	-2.2
5544	17.868	-0.5817	16.0114	-1.85663	18	-2
5546	19.829	-0.74803	17.4415	-2.38751	20	-2.4
5547	21.4368	-0.5082	19.8148	-1.62204	22	-1.8
5549	22.8	-0.77055	20.3406	-2.45939	23	-2.6
5551	22.663	-0.77824	20.1791	-2.48394	23	-2.6
5552	21.5635	-0.7354	19.2163	-2.3472	22	-2.4
5553	19.373	-0.65628	17.2783	-2.09467	20	-2.2
5554	19.629	-0.5126	17.9929	-1.63608	20	-1.8
5555	22.6042	-0.5994	20.6911	-1.91313	23	-2
5556	21.8201	-0.7264	19.5016	-2.31848	22	-2.4
5557	24.01	-0.854	21.2843	-2.72574	25	-2.8
5558	18.076	-0.723522	15.7667	-2.30929	19	-2.4
5561	21.7676	-0.717754	19.4767	-2.29088	22	-2.4
5562	20.074	-0.64665	18.0101	-2.06394	21	-2.2
5563	21.0665	-0.68011	18.8958	-2.17073	22	-2.2
5588	22.6196	-0.81785	20.0092	-2.61036	23	-2.8
5589	20.8472	-0.722855	18.54	-2.30716	21	-2.4
5593	22.6079	-0.76433	20.1684	-2.43954	23	-2.6
5595	24.083	-0.79472	21.5465	-2.53654	25	-2.6
5596	22.958	-0.77856	20.473	-2.48496	23	-2.6
5597	20.778	-0.5951	18.8786	-1.8994	21	-2
5604	21.4471	-0.73477	19.1019	-2.34519	22	-2.4
5605	22.2376	-0.77165	19.7747	-2.4629	23	-2.6
5606	22.1721	-0.8248	19.5396	-2.63254	23	-2.8
5607	20.484	-0.68474	18.2985	-2.18551	21	-2.2
5609	22.2284	-0.727513	19.9064	-2.32203	23	-2.4
5615	22.404	-0.78575	19.8961	-2.50791	23	-2.6
5616	18.954	-0.66528	16.8306	-2.1234	19	-2.2
5617	20.544	-0.720582	18.2441	-2.29991	21	-2.4
5618	20.8695	-0.80066	18.314	-2.55549	21	-2.6
5619	22.4079	-0.79699	19.8641	-2.54378	23	-2.6
5622	21.7132	-0.6906	19.509	-2.20421	22	-2.4
5623	23.486	-0.8251	20.8525	-2.6335	24	-2.8
5624	22.1424	-0.74147	19.7758	-2.36658	23	-2.4
5625	22.5759	-0.74839	20.1872	-2.38866	23	-2.4
5626	18.599	-0.5739	16.7673	-1.83174	19	-2
5627	22.735	-0.75397	20.3285	-2.40647	23	-2.6
5630	23.426	-0.79593	20.8856	-2.5404	24	-2.6
5631	22.5654	-0.77726	20.0846	-2.48081	23	-2.6
5632	22.679	-0.5824	20.8201	-1.85887	23	-2
5634	21.7634	-0.81374	19.1662	-2.59724	22	-2.6
5636	21.696	-0.76142	19.2658	-2.43025	22	-2.6
5658	19.914	-0.8506	17.1991	-2.71489	20	-2.8
5659	20.389	-0.615	18.4261	-1.96292	21	-2
5662	21.4308	-0.62896	19.4233	-2.00747	22	-2.2
5671	20.377	-0.77671	17.8979	-2.47905	21	-2.6
5678	22.5061	-0.78203	20.0101	-2.49603	23	-2.6
5723	20.099	-1.312	15.9114	-4.18756	21	-4.2
5728	23.373	-0.69119	21.1669	-2.2061	24	-2.4
5731	18.911	-0.68272	16.7319	-2.17906	19	-2.2
5732	19.295	-0.8267	16.6564	-2.63861	20	-2.8
5734	19.42	-1.1007	15.9069	-3.51314	20	-3.6
5741	21.1363	-0.69741	18.9104	-2.22595	22	-2.4
5747	22.1031	-0.67834	19.938	-2.16508	23	-2.2
5749	22.311	-0.74863	19.9216	-2.38943	23	-2.4
5750	21.4885	-0.709989	19.2224	-2.2661	22	-2.4
5751	21.7781	-0.65105	19.7001	-2.07798	22	-2.2
5752	22.3152	-0.70815	20.055	-2.26023	23	-2.4
5758	21.3473	-0.73922	18.9879	-2.35939	22	-2.4
5759	22.5217	-0.73009	20.1914	-2.33025	23	-2.4
5762	23.253	-0.75694	20.837	-2.41595	24	-2.6
5763	22.754	-0.78356	20.2531	-2.50092	23	-2.6
5768	24.586	-0.5343	22.8807	-1.70534	25	-1.8
5772	22.806	-0.73532	20.4591	-2.34695	23	-2.4
5775	21.3812	-0.716077	19.0957	-2.28553	22	-2.4
5776	22.5	-0.6239	20.5087	-1.99132	23	-2
5778	20.42	-0.73854	18.0628	-2.35722	21	-2.4
5780	20.9158	-0.65961	18.8105	-2.1053	21	-2.2
5783	21.1644	-0.8615	18.4147	-2.74968	22	-2.8
5795	21.765	-0.70814	19.5048	-2.2602	22	-2.4
5796	22.1176	-0.711322	19.8472	-2.27035	23	-2.4
5797	22.335	-0.64178	20.2866	-2.04839	23	-2.2
5801	21.303	-0.70585	19.0501	-2.25289	22	-2.4
5804	23.306	-0.8387	20.6291	-2.67691	24	-2.8
5811	23.754	-0.588	21.8773	-1.87674	24	-2
5813	21.6984	-0.716867	19.4103	-2.28805	22	-2.4
5814	21.5997	-0.718732	19.3057	-2.294	22	-2.4
5815	21.1758	-0.73981	18.8145	-2.36128	22	-2.4
5816	19.584	-0.69181	17.3759	-2.20807	20	-2.4
5817	22.731	-0.76646	20.2847	-2.44634	23	-2.6
5819	21.7419	-0.70801	19.4821	-2.25978	22	-2.4
5820	22.1265	-0.4429	20.7129	-1.41362	23	-1.6
5822	19.546	-0.6018	17.6252	-1.92079	20	-2
5826	22.716	-0.78142	20.2219	-2.49409	23	-2.6
5827	20.375	-0.70249	18.1328	-2.24216	21	-2.4
5830	21.4888	-0.713732	19.2108	-2.27804	22	-2.4
5833	19.863	-0.69558	17.6429	-2.22011	20	-2.4
5834	20.29	-0.720885	17.9891	-2.30087	21	-2.4
5840	21.9094	-0.69477	19.6919	-2.21752	22	-2.4
5841	22.0697	-0.68468	19.8844	-2.18532	23	-2.2
5842	21.3362	-0.723851	19.0259	-2.31034	22	-2.4
5843	22.0213	-0.5793	20.1723	-1.84897	23	-2
5844	21.3906	-0.709566	19.1259	-2.26475	22	-2.4
5845	20.9041	-0.77999	18.4146	-2.48952	21	-2.6
5848	22.64	-0.77714	20.1596	-2.48042	23	-2.6
5849	21.9815	-0.6685	19.8478	-2.13367	22	-2.2
5853	22.1273	-0.70356	19.8817	-2.24558	23	-2.4
5874	21.5714	-0.717238	19.2822	-2.28923	22	-2.4
5877	21.2707	-0.8884	18.4352	-2.83554	22	-3
5878	20.8968	-0.8689	18.1235	-2.7733	21	-2.8
5879	22.0577	-0.67185	19.9133	-2.14437	23	-2.2
5880	22.0548	-0.712328	19.7812	-2.27356	23	-2.4
5886	22.4488	-0.75447	20.0407	-2.40807	23	-2.6
5890	20.7152	-0.70709	18.4584	-2.25684	21	-2.4
5891	20.603	-0.69012	18.4003	-2.20268	21	-2.4
5894	22.3849	-0.72963	20.0561	-2.32879	23	-2.4
5895	22.0406	-0.74016	19.6782	-2.36239	23	-2.4
5898	21.9584	-0.6137	19.9996	-1.95877	22	-2
5899	22.652	-0.5058	21.0376	-1.61438	23	-1.8
5900	19.613	-0.78158	17.1184	-2.4946	20	-2.6
5901	22.0601	-0.728449	19.7351	-2.32502	23	-2.4
5903	22.93	-0.4923	21.3587	-1.57129	23	-1.6
5904	22.669	-0.80823	20.0893	-2.57966	23	-2.6
5905	22.1052	-0.66283	19.9896	-2.11558	23	-2.2
5906	20.617	-0.79652	18.0747	-2.54228	21	-2.6
5907	20.9444	-0.73013	18.614	-2.33038	21	-2.4
5908	20.339	-0.70201	18.0984	-2.24063	21	-2.4
5909	22.5405	-0.79732	19.9957	-2.54483	23	-2.6
5914	20.305	-0.76011	17.8789	-2.42607	21	-2.6
5917	22.0353	-0.7313	19.7012	-2.33412	23	-2.4
5919	21.05	-0.67894	18.883	-2.167	22	-2.2
5920	22.11	-0.74009	19.7478	-2.36217	23	-2.4
5921	22.162	-0.75003	19.7681	-2.3939	23	-2.4
5922	21.7488	-0.713351	19.472	-2.27683	22	-2.4
5925	20.583	-0.76721	18.1343	-2.44873	21	-2.6
5927	21.2469	-0.725282	18.932	-2.31491	22	-2.4
5930	22.154	-0.70273	19.9111	-2.24293	23	-2.4
5931	18.454	-0.63051	16.4416	-2.01242	19	-2.2
5932	19.015	-0.68413	16.8314	-2.18356	20	-2.2
5935	19.573	-0.69167	17.3654	-2.20763	20	-2.4
5973	20.543	-0.8532	17.8198	-2.72319	21	-2.8
5974	19.77	-0.7767	17.291	-2.47902	20	-2.6
5976	20.448	-0.80951	17.8643	-2.58374	21	-2.6
5977	20.236	-0.720948	17.9349	-2.30108	21	-2.4
5978	21.5671	-0.715553	19.2832	-2.28386	22	-2.4
5980	22.947	-0.6172	20.9771	-1.96994	23	-2
5981	21.8777	-0.5214	20.2135	-1.66417	22	-1.8
5983	20.782	-0.68374	18.5997	-2.18232	21	-2.2
5988	21.9449	-0.66834	19.8117	-2.13316	22	-2.2
5990	21.7316	-0.70541	19.4801	-2.25148	22	-2.4
5992	22.2689	-0.74684	19.8852	-2.38372	23	-2.4
5993	23.05	-0.77998	20.5605	-2.48949	24	-2.6
5998	21.2196	-0.73779	18.8648	-2.35483	22	-2.4
6002	22.2091	-0.67396	20.058	-2.1511	23	-2.2
6015	22.3879	-0.72967	20.059	-2.32891	23	-2.4
6016	22.285	-0.68859	20.0872	-2.1978	23	-2.2
6020	21.8483	-0.72899	19.5216	-2.32674	22	-2.4
6022	21.3692	-0.70508	19.1188	-2.25043	22	-2.4
6028	21.3967	-0.722881	19.0895	-2.30724	22	-2.4
6029	20.027	-0.9955	16.8496	-3.17737	21	-3.2
6030	20.7517	-1.1751	17.0011	-3.75061	21	-3.8
6032	20.172	-0.78619	17.6627	-2.50931	21	-2.6
6035	20.388	-0.8924	17.5397	-2.8483	21	-3
6036	21.8447	-0.725602	19.5288	-2.31593	22	-2.4
6037	18.552	-0.4593	17.086	-1.46596	19	-1.6
6038	19.899	-0.9059	17.0076	-2.89139	20	-3
6039	22.0499	-0.74367	19.6763	-2.3736	23	-2.4
6047	25.391	-0.8831	22.5724	-2.81862	26	-3
6082	24.139	-0.8899	21.2987	-2.84033	25	-3
6084	20.9279	-0.63881	18.889	-2.03891	21	-2.2
6085	22.634	-0.81924	20.0192	-2.6148	23	-2.8
6086	22.518	-0.7691	20.0632	-2.45476	23	-2.6
6088	20.42	-0.73854	18.0628	-2.35722	21	-2.4
6089	23.326	-0.80309	20.7627	-2.56325	24	-2.6
6090	20.513	-0.64092	18.4674	-2.04565	21	-2.2
6095	21.9691	-0.67587	19.8119	-2.1572	22	-2.2
6099	21.4824	-0.718951	19.1877	-2.2947	22	-2.4
6100	23.224	-0.74066	20.86	-2.36399	24	-2.4
6102	22.1716	-0.69382	19.9571	-2.21449	23	-2.4
6103	21.2395	-0.74858	18.8502	-2.38927	22	-2.4
6113	21.3581	-0.74356	18.9849	-2.37325	22	-2.4
6114	21.5847	-0.73228	19.2475	-2.33724	22	-2.4
6116	21.5409	-0.4047	20.2492	-1.2917	22	-1.4
6117	21.3916	-0.722963	19.0841	-2.30751	22	-2.4
6118	21.4852	-0.711815	19.2133	-2.27192	22	-2.4
6120	22.869	-0.7901	20.3472	-2.52179	23	-2.6
6121	21.652	-0.721115	19.3504	-2.30161	22	-2.4
6122	21.9141	-0.70572	19.6616	-2.25247	22	-2.4
6123	20.064	-0.65326	17.979	-2.08503	21	-2.2
6124	19.337	-0.5954	17.4366	-1.90036	20	-2
6125	21.9037	-0.69687	19.6795	-2.22422	22	-2.4
6127	22.2915	-0.7568	19.876	-2.41551	23	-2.6
6131	21.2406	-0.7032	18.9962	-2.24443	22	-2.4
6132	22.4608	-0.74489	20.0833	-2.37749	23	-2.4
6133	21.6751	-0.715063	19.3928	-2.28229	22	-2.4
6136	21.4301	-0.67341	19.2808	-2.14935	22	-2.2
6145	23.734	-0.80189	21.1746	-2.55942	24	-2.6
6146	20.9199	-0.75447	18.5118	-2.40807	21	-2.6
6147	21.4549	-0.710587	19.1869	-2.26801	22	-2.4
6150	21.181	-0.64265	19.1298	-2.05117	22	-2.2
6151	22.1615	-0.68453	19.9767	-2.18484	23	-2.2
6152	22.4394	-0.70616	20.1855	-2.25388	23	-2.4
6154	21.0248	-0.67716	18.8635	-2.16132	22	-2.2
6155	21.6177	-0.69142	19.4109	-2.20683	22	-2.4
6159	21.0345	-0.69902	18.8034	-2.23109	22	-2.4
6162	22.1557	-0.728567	19.8303	-2.32539	23	-2.4
6163	21.9274	-0.68597	19.738	-2.18943	22	-2.2
6164	21.2972	-0.7011	19.0595	-2.23773	22	-2.4
6165	22.2243	-0.77888	19.7383	-2.48598	23	-2.6
6166	21.6849	-0.70477	19.4354	-2.24944	22	-2.4
6167	22.812	-0.73539	20.4648	-2.34717	23	-2.4
6168	21.6111	-0.65991	19.5049	-2.10626	22	-2.2
6169	21.0866	-0.69612	18.8648	-2.22183	22	-2.4
6170	22.804	-0.591	20.9177	-1.88632	23	-2
6171	23.487	-0.73416	21.1438	-2.34324	24	-2.4
6172	21.509	-0.64794	19.4409	-2.06805	22	-2.2
6173	19.013	-0.5652	17.209	-1.80397	20	-2
6174	21.6562	-0.721252	19.3541	-2.30205	22	-2.4
6175	21.0127	-0.81457	18.4128	-2.59989	22	-2.6
6176	22.1275	-0.63333	20.1061	-2.02142	23	-2.2
6181	18.542	-0.76865	16.0887	-2.45333	19	-2.6
6184	21.4493	-0.64057	19.4048	-2.04453	22	-2.2
6186	19.177	-0.5203	17.5163	-1.66066	20	-1.8
6189	22.1377	-0.827	19.4981	-2.63956	23	-2.8
6191	22.0033	-0.73557	19.6556	-2.34774	23	-2.4
6193	21.7488	-0.70914	19.4854	-2.26339	22	-2.4
6195	22.0774	-0.73412	19.7343	-2.34312	23	-2.4
6196	20.949	-0.69846	18.7197	-2.2293	21	-2.4
6197	21.474	-0.713103	19.198	-2.27604	22	-2.4
6200	21.9955	-0.68156	19.8201	-2.17536	22	-2.2
6201	20.8459	-0.8926	17.997	-2.84894	21	-3
6202	21.6823	-0.9092	18.7804	-2.90193	22	-3
6277	22.4463	-0.718316	20.1536	-2.29267	23	-2.4
6303	19.99	-0.8703	17.2122	-2.77777	20	-2.8
6304	21.515	-0.73484	19.1696	-2.34541	22	-2.4
6305	21.6348	-0.717455	19.3449	-2.28993	22	-2.4
6306	20.109	-1.032	16.8151	-3.29387	21	-3.4
6308	18.847	-0.523	17.1777	-1.66928	19	-1.8
6309	20.344	-0.73976	17.9829	-2.36112	21	-2.4
6331	21.4569	-0.714336	19.1769	-2.27997	22	-2.4
6332	21.8583	-0.65618	19.7639	-2.09435	22	-2.2
6333	19.543	-0.5836	17.6803	-1.8627	20	-2
6338	22.0305	-0.78446	19.5267	-2.50379	23	-2.6
6340	21.9662	-0.74381	19.5922	-2.37404	22	-2.4
6342	18.677	-0.511	17.046	-1.63098	19	-1.8
6345	21.8526	-0.75836	19.4321	-2.42048	22	-2.6
6346	20.6958	-0.65387	18.6088	-2.08698	21	-2.2
6347	23.752	-0.74808	21.3643	-2.38767	24	-2.4
6348	20.6428	-0.73489	18.2972	-2.34557	21	-2.4
6349	21.9635	-0.723937	19.6529	-2.31062	22	-2.4
6354	22.771	-0.76116	20.3416	-2.42942	23	-2.6
6362	22.2083	-0.73444	19.8642	-2.34414	23	-2.4
6365	22.1745	-0.75763	19.7563	-2.41815	23	-2.6
6368	23.078	-0.69592	20.8568	-2.22119	24	-2.4
6369	23.372	-0.79813	20.8246	-2.54742	24	-2.6
6380	22.1779	-0.7588	19.756	-2.42189	23	-2.6
6386	22.2622	-0.75549	19.8509	-2.41132	23	-2.6
6391	20.7311	-0.9032	17.8483	-2.88278	21	-3
6392	20.184	-1.1159	16.6223	-3.56166	21	-3.6
6396	20.411	-0.65074	18.334	-2.07699	21	-2.2
6398	22.63	-0.6098	20.6837	-1.94632	23	-2
6399	21.2108	-0.7382	18.8547	-2.35614	22	-2.4
6400	22.951	-0.77579	20.4749	-2.47612	23	-2.6
6402	21.3912	-0.709591	19.1264	-2.26483	22	-2.4
6403	20.8011	-0.68455	18.6162	-2.1849	21	-2.2
6404	21.7431	-0.720962	19.442	-2.30112	22	-2.4
6405	20.021	-0.69772	17.7941	-2.22694	21	-2.4
6406	21.8652	-0.5755	20.0284	-1.83684	22	-2
6408	22.223	-0.7256	19.9071	-2.31592	23	-2.4
6409	20.7011	-0.7671	18.2527	-2.44838	21	-2.6
6410	23.36	-0.79492	20.8228	-2.53717	24	-2.6
6411	22.1524	-0.7355	19.8049	-2.34752	23	-2.4
6412	23.45	-0.74401	21.0753	-2.37468	24	-2.4
6414	20.378	-0.63279	18.3583	-2.0197	21	-2.2
6418	21.7839	-0.726256	19.4659	-2.31802	22	-2.4
6421	23.425	-0.79396	20.8909	-2.53411	24	-2.6
6422	20.476	-0.70385	18.2295	-2.2465	21	-2.4
6423	19.816	-0.721449	17.5133	-2.30267	20	-2.4
6425	21.9422	-0.75288	19.5392	-2.40299	22	-2.6
6435	21.6948	-0.66562	19.5703	-2.12448	22	-2.2
6439	20.8725	-0.70921	18.6089	-2.26361	21	-2.4
6441	20.35	-0.77692	17.8703	-2.47972	21	-2.6
6443	19.06	-0.68474	16.8745	-2.18551	20	-2.2
6445	21.8555	-0.73597	19.5065	-2.34902	22	-2.4
6446	21.2385	-0.7086	18.9768	-2.26166	22	-2.4
6447	20.148	-0.6151	18.1848	-1.96324	21	-2
6451	20.7667	-0.4717	19.2612	-1.50554	21	-1.6
6452	22.5904	-0.7694	20.1347	-2.45572	23	-2.6
6453	23.758	-0.74817	21.37	-2.38796	24	-2.4
6454	21.581	-0.716536	19.294	-2.28699	22	-2.4
6455	23.469	-0.8373	20.7966	-2.67244	24	-2.8
6458	21.7437	-0.68512	19.557	-2.18672	22	-2.2
6459	21.6873	-0.728865	19.3609	-2.32634	22	-2.4
6460	22.3792	-0.72955	20.0507	-2.32853	23	-2.4
6462	22.2675	-0.728041	19.9438	-2.32371	23	-2.4
6463	20.7343	-0.568	18.9214	-1.81291	21	-2
6464	21.2166	-0.713854	18.9382	-2.27843	22	-2.4
6465	21.6534	-0.721664	19.35	-2.30336	22	-2.4
6473	22.367	-0.77218	19.9024	-2.46459	23	-2.6
6474	22.646	-0.79193	20.1184	-2.52763	23	-2.6
6475	21.8224	-0.73363	19.4808	-2.34155	22	-2.4
6476	22.6197	-0.7328	20.2808	-2.3389	23	-2.4
6478	22.2606	-0.75561	19.8489	-2.41171	23	-2.6
6479	21.3142	-0.2605	20.4828	-0.831447	22	-1
6482	21.9386	-0.714191	19.6591	-2.27951	22	-2.4
6483	21.7829	-0.726214	19.465	-2.31788	22	-2.4
6486	26.687	-0.5909	24.801	-1.886	27	-2
6487	20.09	-0.65437	18.0014	-2.08858	21	-2.2
6488	22.5136	-0.76395	20.0753	-2.43833	23	-2.6
6489	20.5	-0.70418	18.2524	-2.24756	21	-2.4
6503	21.9238	-0.70527	19.6728	-2.25103	22	-2.4
6504	21.971	-0.724039	19.6601	-2.31094	22	-2.4
6506	20.7058	-0.9398	17.7062	-2.99959	21	-3
6518	21.1928	-0.69508	18.9743	-2.21851	22	-2.4
6519	22.3493	-0.70761	20.0908	-2.2585	23	-2.4
6520	22.5279	-0.62087	20.5462	-1.98165	23	-2
6521	20.6964	-0.70683	18.4404	-2.25601	21	-2.4
6522	20.261	-0.8239	17.6313	-2.62967	21	-2.8
6523	22.5907	-0.76049	20.1634	-2.42728	23	-2.6
6526	22.0376	-0.74887	19.6474	-2.39019	23	-2.4
6527	22.824	-0.75307	20.4204	-2.4036	23	-2.6
6536	19.232	-0.584	17.368	-1.86397	20	-2
6537	19.773	-0.63904	17.7334	-2.03965	20	-2.2
6563	23.257	-0.78878	20.7394	-2.51758	24	-2.6
6564	22.998	-0.5256	21.3204	-1.67758	23	-1.8
6565	24.122	-0.725037	21.8079	-2.31413	25	-2.4
6567	20.468	-0.68418	18.2843	-2.18372	21	-2.2
6574	21.0062	-0.69325	18.7935	-2.21267	22	-2.4
6577	25.075	-0.74843	22.6862	-2.38879	26	-2.4
6583	22.845	-0.78533	20.3384	-2.50657	23	-2.6
6584	21.0551	-0.67142	18.9121	-2.14299	22	-2.2
6585	22.267	-0.712546	19.9927	-2.27426	23	-2.4
6586	21.1603	-0.75468	18.7516	-2.40874	22	-2.6
6587	20.8999	-0.65826	18.7989	-2.10099	21	-2.2
6588	22.3059	-0.80495	19.7367	-2.56919	23	-2.6
6590	18.044	-0.5166	16.3951	-1.64885	19	-1.8
6591	20.073	-0.67457	17.92	-2.15305	21	-2.2
6592	22.3798	-0.70712	20.1229	-2.25694	23	-2.4
6593	19.701	-0.64	17.6583	-2.04271	20	-2.2
6596	20.214	-0.65962	18.1087	-2.10533	21	-2.2
6598	21.0478	-0.67975	18.8782	-2.16958	22	-2.2
6599	22.2311	-0.76981	19.7741	-2.45703	23	-2.6
6600	21.138	-0.69214	18.9289	-2.20913	22	-2.4
6605	19.953	-0.4888	18.3929	-1.56012	20	-1.6
6608	24.977	-0.9216	22.0355	-2.9415	25	-3
6609	18.786	-0.5442	17.0491	-1.73694	19	-1.8
6611	20.6402	-0.69182	18.4321	-2.20811	21	-2.4
6613	19.027	-0.5358	17.3169	-1.71013	20	-1.8
6615	21.7089	-0.727455	19.3871	-2.32184	22	-2.4
6616	23.061	-0.6522	20.9794	-2.08165	24	-2.2
6617	22.0905	-0.70195	19.8501	-2.24044	23	-2.4
6620	22.2557	-0.713544	19.9783	-2.27744	23	-2.4
6622	22.925	-0.5778	21.0808	-1.84418	23	-2
6623	21.4714	-0.710876	19.2025	-2.26893	22	-2.4
6624	22.903	-0.79201	20.3751	-2.52789	23	-2.6
6625	21.3217	-0.723595	19.0122	-2.30952	22	-2.4
6628	22.1749	-0.726792	19.8552	-2.31973	23	-2.4
6630	21.5643	-0.714577	19.2835	-2.28074	22	-2.4
6632	22.824	-0.77039	20.3651	-2.45888	23	-2.6
6633	24.374	-0.8787	21.5694	-2.80458	25	-3
6634	21.4949	-0.710447	19.2273	-2.26756	22	-2.4
6635	20.9422	-0.70029	18.7071	-2.23514	21	-2.4
6636	21.4245	-0.71666	19.1371	-2.28739	22	-2.4
6644	22.717	-0.76689	20.2693	-2.44771	23	-2.6
6645	20.309	-0.6082	18.3678	-1.94121	21	-2
6646	22.3006	-0.74001	19.9387	-2.36192	23	-2.4
6649	22.5848	-0.70383	20.3384	-2.24644	23	-2.4
6650	21.56	-0.714216	19.2804	-2.27959	22	-2.4
6651	19.982	-0.5805	18.1292	-1.8528	20	-2
6652	20.7534	-0.65795	18.6534	-2.1	21	-2.2
6653	20.383	-0.66555	18.2587	-2.12426	21	-2.2
6654	19.399	-0.62278	17.4113	-1.98775	20	-2
6655	20.7244	-0.65589	18.631	-2.09343	21	-2.2
6656	21.2854	-0.69085	19.0804	-2.20501	22	-2.4
6659	20.9364	-0.6519	18.8557	-2.08069	21	-2.2
6662	22.3212	-0.74906	19.9304	-2.3908	23	-2.4
6663	23.234	-0.78383	20.7322	-2.50178	24	-2.6
6665	19.394	-0.5654	17.5894	-1.80461	20	-2
6666	20.309	-0.75953	17.8848	-2.42422	21	-2.6
6667	22.5404	-0.59	20.6573	-1.88312	23	-2
6671	23.262	-0.64345	21.2083	-2.05372	24	-2.2
6672	21.1352	-0.67821	18.9705	-2.16467	22	-2.2
6673	21.523	-0.73611	19.1735	-2.34947	22	-2.4
6674	19.805	-0.68687	17.6127	-2.19231	20	-2.2
6675	19.673	-0.70858	17.4114	-2.2616	20	-2.4
6678	22.1603	-0.8607	19.4132	-2.74713	23	-2.8
6679	21.4657	-0.69907	19.2345	-2.23125	22	-2.4
6680	21.6122	-0.76639	19.1661	-2.44611	22	-2.6
6682	20.7329	-0.70182	18.4929	-2.24002	21	-2.4
6683	19.933	-0.8231	17.3059	-2.62712	20	-2.8
6687	22.3237	-0.66513	20.2008	-2.12292	23	-2.2
6689	20.525	-0.69104	18.3194	-2.20562	21	-2.4
6690	21.7857	-0.70706	19.529	-2.25675	22	-2.4
6691	21.823	-0.6026	19.8997	-1.92334	22	-2
6692	20.236	-0.65622	18.1415	-2.09448	21	-2.2
6693	19.531	-0.8374	16.8582	-2.67276	20	-2.8
6694	18.113	-0.62741	16.1105	-2.00253	19	-2.2
6695	19.333	-0.577	17.4914	-1.84163	20	-2
6696	21.6463	-0.721165	19.3446	-2.30177	22	-2.4
6697	23.547	-0.8386	20.8704	-2.67659	24	-2.8
6701	21.831	-0.73359	19.4896	-2.34142	22	-2.4
6703	23.041	-0.65367	20.9547	-2.08634	24	-2.2
6704	20.6699	-0.69266	18.4591	-2.21079	21	-2.4
6705	19.34	-0.8595	16.5967	-2.7433	20	-2.8
6706	22.991	-0.77697	20.5111	-2.47988	23	-2.6
6708	21.383	-0.719582	19.0863	-2.29672	22	-2.4
6711	19.87	-0.67022	17.7308	-2.13916	20	-2.2
6713	21.9803	-0.74984	19.587	-2.39329	22	-2.4
6714	21.4936	-0.713935	19.2149	-2.27869	22	-2.4
6715	20.477	-0.71614	18.1913	-2.28573	21	-2.4
6716	22.661	-0.8503	19.9471	-2.71393	23	-2.8
6717	22.0796	-0.74025	19.7169	-2.36268	23	-2.4
6718	20.7039	-0.712407	18.4301	-2.27381	21	-2.4
6719	20.9724	-0.8758	18.1771	-2.79532	21	-2.8
6721	25.12	-0.64383	23.0651	-2.05493	26	-2.2
6722	23.907	-0.63451	21.8818	-2.02519	24	-2.2
6723	21.6308	-0.5566	19.8543	-1.77652	22	-1.8
6724	21.826	-0.64513	19.7669	-2.05908	22	-2.2
6725	22.0026	-0.65128	19.9239	-2.07871	23	-2.2
6726	21.8092	-0.8315	19.1553	-2.65393	22	-2.8
6727	22.3355	-1.2542	18.3324	-4.00307	23	-4.2
6729	21.6533	-0.719698	19.3562	-2.29709	22	-2.4
6730	22.5889	-0.75016	20.1946	-2.39431	23	-2.4
6731	19.798	-0.6682	17.6653	-2.13272	20	-2.2
6732	20.443	-0.66934	18.3066	-2.13636	21	-2.2
6762	21.1071	-0.69022	18.9041	-2.203	22	-2.4
6767	19.56	-0.5508	17.802	-1.75801	20	-1.8
6769	20.6233	-0.70584	18.3704	-2.25285	21	-2.4
6770	21.1715	-0.77509	18.6976	-2.47388	22	-2.6
6773	21.395	-0.712992	19.1193	-2.27568	22	-2.4
6776	21.0034	-0.68549	18.8155	-2.1879	22	-2.2
6777	22.944	-0.8272	20.3038	-2.6402	23	-2.8
6779	21.7422	-0.65786	19.6425	-2.09971	22	-2.2
6784	21.186	-0.729215	18.8585	-2.32746	22	-2.4
6825	21.4149	-0.728771	19.0889	-2.32604	22	-2.4
6826	21.9991	-0.75143	19.6007	-2.39837	22	-2.4
6827	22.4434	-0.80831	19.8635	-2.57991	23	-2.6
6828	22.902	-0.73661	20.5509	-2.35106	23	-2.4
6830	22.5798	-0.68952	20.379	-2.20077	23	-2.4
6831	20.201	-0.74403	17.8263	-2.37475	21	-2.4
6833	21.0163	-0.69873	18.7861	-2.23016	22	-2.4
6834	21.2083	-0.729019	18.8815	-2.32684	22	-2.4
6838	22.2616	-0.5134	20.623	-1.63864	23	-1.8
[truncated: 439 more rows]
