# Supplementary material for: Natural Selection on Individual Variation in Tolerance of Gastrointestinal Nematode Infection
Source: PLoS Biol. 2014 Jul 29;12(7):e1001917. doi: 10.1371/journal.pbio.1001917 (PMC4114752; doi:10.1371/journal.pbio.1001917)
Supplement: Table S9 — Data used to plot Figure S1. The mean and standard error of body weight were calculated from the data file (Table S2) at each level of strongyle FEC for lambs (aged 0) and adults (aged >0). Bins are delineated as for Table S4. (XLSX) [file pbio.1001917.s010.xlsx]

## Sheet: Table S9
Faecal Egg Count	Age group	Mean body weight	SE body weight
0	Lamb	14.2482	0.202921
100	Lamb	13.8711	0.194365
200	Lamb	13.5154	0.143996
300	Lamb	13.2846	0.203738
400	Lamb	13.5216	0.170813
500	Lamb	13.5024	0.286414
600	Lamb	13.007	0.189744
700	Lamb	12.6979	0.290286
800	Lamb	12.7192	0.279702
900	Lamb	12.1908	0.394266
1000	Lamb	12.6237	0.184385
1500	Lamb	12.0281	0.280896
2000	Lamb	10.5153	0.287151
0	Adult	23.2401	0.123898
100	Adult	22.4826	0.185827
200	Adult	23.027	0.278546
300	Adult	23.3463	0.408533
400	Adult	24.0066	0.476348
500	Adult	23.1385	0.671441
600	Adult	24.4427	0.608253
700	Adult	23.6039	0.980629
800	Adult	22.7912	0.898019
900	Adult	25.23	1.77595
1000	Adult	22.8589	0.884376
1500	Adult	18.1367	1.40144
2000	Adult	17.9833	2.4468
